# Supplementary material for: Genetic Diversity and Signatures of Selection in 15 Chinese Indigenous Dog Breeds Revealed by Genome-Wide SNPs
Source: Front Genet. 2019 Nov 15;10:1174. doi: 10.3389/fgene.2019.01174 (PMC6872681; doi:10.3389/fgene.2019.01174)
Supplement: Table S2 — Details about gene flow between Chinese and Western dog populations from ABBA-BABA analyses. [file Table_2.xlsx]

## Sheet: Dstat
Table S2. Detailed results of introgression from ABBA-BABA analyses in Chinese and Western dog populations.
(a) Greenland sledge dog (W_GSl) shows evidence of gene flow from Chinese dogs.
P1	P2	P3	P4	D.stat	sd	Zscore	No.BBAA	No.BABA	No.ABBA
W_Dac	W_GSl	C_CDH	C_AGW	0.6075	0.000744	8.162	9294	10071	127933
W_Dac	W_GSl	C_CRD	C_AGW	0.288	0.000655	4.398	9562	9930	127936
W_Dac	W_GSl	C_GXH	C_AGW	0.5871	0.000697	8.425	9293	10044	127938
W_Dac	W_GSl	C_LSH	C_AGW	0.1228	0.000745	1.649	9743	9900	127931
W_Dac	W_GSl	C_QCH	C_AGW	0.0944	0.000666	1.417	9760	9881	127918
W_Dac	W_GSl	C_SrP	C_AGW	0.0521	0.000717	0.727	9879	9945	127939
W_Dac	W_GSl	C_XSH	C_AGW	0.6661	0.000708	9.414	9204	10056	127938
(b) Papillon (W_Pap) shows evidence of gene flow from Chinese dogs.
P1	P2	P3	P4	D.stat	sd	Zscore	No.BBAA	No.BABA	No.ABBA
W_Dac	W_Pap	C_CDH	C_AGW	0.5096	0.000617	8.264	8978	9630	127890
W_Dac	W_Pap	C_CRD	C_AGW	0.3799	0.000556	6.831	9135	9621	127894
W_Dac	W_Pap	C_GXH	C_AGW	0.5459	0.000573	9.522	8945	9643	127895
W_Dac	W_Pap	C_LSH	C_AGW	0.178	0.000543	3.28	9327	9555	127888
W_Dac	W_Pap	C_Pkg	C_AGW	0.1849	0.00077	2.401	10054	10290	127895
W_Dac	W_Pap	C_QCH	C_AGW	0.187	0.000526	3.553	9329	9569	127875
W_Dac	W_Pap	C_SrP	C_AGW	0.2222	0.00061	3.644	9414	9698	127896
W_Dac	W_Pap	C_XSH	C_AGW	0.5799	0.000593	9.783	8883	9625	127895
(c) Eurasier (W_Eur) shows evidence of gene flow from Chinese dogs.
P1	P2	P3	P4	D.stat	sd	Zscore	No.BBAA	No.BABA	No.ABBA
W_Dac	W_Eur	C_CDH	C_AGW	0.6606	0.000545	12.132	8958	9803	127939
W_Dac	W_Eur	C_CRD	C_AGW	0.5712	0.000506	11.283	9096	9827	127942
W_Dac	W_Eur	C_GXH	C_AGW	0.7087	0.000521	13.612	8923	9830	127944
W_Dac	W_Eur	C_LSH	C_AGW	0.1985	0.000556	3.57	9396	9650	127937
W_Dac	W_Eur	C_QCH	C_AGW	0.217	0.000493	4.402	9383	9661	127924
W_Dac	W_Eur	C_SrP	C_AGW	0.407	0.000552	7.377	9367	9888	127945
W_Dac	W_Eur	C_XSH	C_AGW	0.7554	0.000512	14.745	8851	9818	127944
(d) Kazakhstan shepherd (C_KzS) shows evidence of gene flow from Western dogs.
P1	P2	P3	P4	D.stat	sd	Zscore	No.BBAA	No.BABA	No.ABBA
C_TMf	C_KzS	W_Dac	C_AGW	1.2081	0.000489	24.707	9675	11221	127903
C_TMf	C_KzS	W_Dob	C_AGW	1.2586	0.000552	22.817	9628	11237	127888
C_TMf	C_KzS	W_EBD	C_AGW	1.1807	0.000538	21.931	9835	11345	127903
C_TMf	C_KzS	W_ESt	C_AGW	1.2689	0.000533	23.825	9633	11256	127903
C_TMf	C_KzS	W_Elk	C_AGW	1.0587	0.000492	21.518	9666	11020	127903
C_TMf	C_KzS	W_Eur	C_AGW	0.3793	0.000454	8.351	9635	10120	127902
C_TMf	C_KzS	W_FSp	C_AGW	0.84	0.000508	16.533	9695	10770	127903
C_TMf	C_KzS	W_GRe	C_AGW	1.1559	0.000483	23.932	9712	11191	127903
C_TMf	C_KzS	W_GSh	C_AGW	1.6897	0.000644	26.248	9420	11581	127901
C_TMf	C_KzS	W_GoS	C_AGW	1.2816	0.000503	25.457	9630	11269	127888
C_TMf	C_KzS	W_Gry	C_AGW	1.3448	0.00056	24.004	9603	11323	127903
C_TMf	C_KzS	W_IrW	C_AGW	1.2795	0.000543	23.583	9609	11245	127892
C_TMf	C_KzS	W_JRT	C_AGW	1.2184	0.000498	24.467	9710	11269	127903
C_TMf	C_KzS	W_LRe	C_AGW	1.2257	0.000476	25.732	9678	11246	127903
C_TMf	C_KzS	W_NFd	C_AGW	1.1866	0.000493	24.062	9693	11210	127893
C_TMf	C_KzS	W_NSD	C_AGW	1.2022	0.000485	24.774	9716	11253	127903
C_TMf	C_KzS	W_Pap	C_AGW	0.5088	0.000543	9.374	9694	10344	127857
C_TMf	C_KzS	W_Rtw	C_AGW	1.1774	0.000508	23.159	9699	11204	127903
C_TMf	C_KzS	W_Sci	C_AGW	1.155	0.000504	22.911	9668	11145	127903
C_TMf	C_KzS	W_StP	C_AGW	1.1446	0.000519	22.036	9860	11324	127903
C_TMf	C_KzS	W_TYo	C_AGW	1.139	0.000485	23.497	9737	11194	127903
C_TMf	C_KzS	W_Wei	C_AGW	1.218	0.00055	22.135	9643	11201	127903
(e) Mongolia Xi dog (W_GSl) shows evidence of gene flow from Western dogs.
P1	P2	P3	P4	D.stat	sd	Zscore	No.BBAA	No.BABA	No.ABBA
C_TMf	C_MGX	W_BMD	C_AGW	0.5081	0.00046	11.04	9936	10586	127940
C_TMf	C_MGX	W_BeT	C_AGW	0.4502	0.000452	9.961	9920	10496	127942
C_TMf	C_MGX	W_Bgl	C_AGW	0.5044	0.000446	11.305	9899	10545	127943
C_TMf	C_MGX	W_BoC	C_AGW	0.5279	0.000477	11.062	9837	10513	127943
C_TMf	C_MGX	W_BoT	C_AGW	0.4555	0.00047	9.695	9939	10521	127784
C_TMf	C_MGX	W_BrS	C_AGW	0.5119	0.000483	10.591	9891	10546	127943
C_TMf	C_MGX	W_CoS	C_AGW	0.4755	0.000435	10.939	9928	10537	127943
C_TMf	C_MGX	W_Dac	C_AGW	0.5098	0.0004	12.753	9892	10544	127943
C_TMf	C_MGX	W_Dob	C_AGW	0.517	0.00046	11.235	9860	10521	127928
C_TMf	C_MGX	W_EBD	C_AGW	0.5432	0.000453	11.989	10007	10702	127943
C_TMf	C_MGX	W_ESt	C_AGW	0.5178	0.000514	10.077	9874	10536	127943
C_TMf	C_MGX	W_Elk	C_AGW	0.4273	0.000402	10.621	9845	10392	127943
C_TMf	C_MGX	W_Eur	C_AGW	0.2216	0.000366	6.049	9570	9854	127942
C_TMf	C_MGX	W_FSp	C_AGW	0.3324	0.000462	7.197	9821	10247	127943
C_TMf	C_MGX	W_GRe	C_AGW	0.4929	0.00044	11.215	9914	10545	127943
C_TMf	C_MGX	W_GSh	C_AGW	0.5989	0.000442	13.565	9830	10596	127941
C_TMf	C_MGX	W_GSl	C_AGW	0.0199	0.00048	0.413	9448	9473	127936
C_TMf	C_MGX	W_GoS	C_AGW	0.5374	0.00045	11.95	9868	10556	127928
C_TMf	C_MGX	W_Gry	C_AGW	0.7304	0.000511	14.297	9771	10706	127943
C_TMf	C_MGX	W_IrW	C_AGW	0.6386	0.000474	13.466	9793	10610	127932
C_TMf	C_MGX	W_JRT	C_AGW	0.5272	0.00041	12.848	9918	10593	127943
C_TMf	C_MGX	W_LRe	C_AGW	0.5354	0.000404	13.251	9884	10569	127943
C_TMf	C_MGX	W_NFd	C_AGW	0.5087	0.000465	10.929	9895	10546	127933
C_TMf	C_MGX	W_NSD	C_AGW	0.5137	0.000424	12.105	9918	10575	127943
C_TMf	C_MGX	W_Pap	C_AGW	0.2371	0.000502	4.727	9687	9990	127895
C_TMf	C_MGX	W_Rtw	C_AGW	0.4828	0.000482	10.011	9909	10527	127943
C_TMf	C_MGX	W_Sci	C_AGW	0.4551	0.000414	10.992	9885	10467	127943
C_TMf	C_MGX	W_StP	C_AGW	0.4797	0.000412	11.633	10041	10654	127943
C_TMf	C_MGX	W_TYo	C_AGW	0.4734	0.000425	11.138	9934	10539	127943
C_TMf	C_MGX	W_Wei	C_AGW	0.5459	0.000462	11.815	9836	10535	127943
