# Supplementary material for: Genetic Diversity and Signatures of Selection in 15 Chinese Indigenous Dog Breeds Revealed by Genome-Wide SNPs
Source: Front Genet. 2019 Nov 15;10:1174. doi: 10.3389/fgene.2019.01174 (PMC6872681; doi:10.3389/fgene.2019.01174)
Supplement: Table S3 — The windows showing selection signatures identified in each of Chinese indigenous dog breeds. [file Table_3.xlsx]

## Sheet: Table S3
Table S3 The windows showing selection signatures identified in each of Chinese indigenous dog breeds
Chromosome	Start (Mb)	End (Mb)	di value	SNP number	overlap with his	breed	genes
5	54000000	54200000	15.6847	10	no	C_CDH	USP24,
16	17400000	17600000	15.756	17	no	C_CDH	DPP6,
20	14200000	14400000	15.8417	8	no	C_CDH	ENSCAFG00000029831,TRNT1,IL5RA,CNTN4,
15	46400000	46600000	16.0898	11	no	C_CDH	NR3C2,
10	8000000	8200000	16.1459	11	no	C_CDH	MSRB3,
18	7400000	7600000	16.5001	7	no	C_CDH	NA
1	10400000	10600000	16.5443	7	no	C_CDH	NA
12	30800000	31000000	16.5562	11	no	C_CDH	NA
8	21200000	21400000	16.7313	8	no	C_CDH	NA
3	58200000	58400000	16.8188	16	no	C_CDH	ADAMTS7,TBC1D2B,IDH3A,ACSBG1,DNAJA4,
16	12000000	12200000	16.9332	10	no	C_CDH	NA
23	30800000	31000000	17.0406	7	no	C_CDH	SLCO2A1,RYK,
15	31000000	31200000	17.0771	7	no	C_CDH	NA
15	47800000	48000000	17.143	11	no	C_CDH	IQCM,
3	59000000	59200000	17.2246	19	no	C_CDH	TBC1D14,ENSCAFG00000014356,TADA2B,GRPEL1,
10	7800000	8000000	17.2246	9	no	C_CDH	LEMD3,MSRB3,
25	4400000	4600000	17.4636	12	no	C_CDH	DCLK1,
18	5600000	5800000	17.4795	15	no	C_CDH	NA
38	20000000	20200000	17.5707	14	no	C_CDH	DDR2,UAP1,
18	7000000	7200000	17.5775	14	no	C_CDH	HECW1,
9	600000	800000	17.7962	10	no	C_CDH	NPLOC4,FAAP100,FSCN2,ACTG1,BAHCC1,
15	40800000	41000000	17.9691	7	no	C_CDH	CCDC53,NUP37,PARPBP,
15	28400000	28600000	18.0806	15	yes	C_CDH	NA
2	71400000	71600000	18.3173	15	no	C_CDH	MECR,SRSF4,ENSCAFG00000032586,TMEM200B,EPB41,
10	8800000	9000000	18.6024	7	no	C_CDH	GRIP1,
4	48600000	48800000	18.6213	12	no	C_CDH	GABRG2,
3	56200000	56400000	18.6722	14	no	C_CDH	NA
3	55600000	55800000	18.8602	15	no	C_CDH	ADAMTSL3,SAXO2,EFL1,
3	32200000	32400000	18.9527	7	no	C_CDH	CYFIP1,TUBGCP5,OCA2,
15	28600000	28800000	19.2389	15	no	C_CDH	NA
18	13400000	13600000	19.267	13	no	C_CDH	PRKAR2B,PIK3CG,
32	4800000	5000000	19.3747	12	no	C_CDH	C4orf22,
8	33400000	33600000	19.8908	9	no	C_CDH	C14orf37,ACTR10,
18	5400000	5600000	19.8991	8	no	C_CDH	VSTM2A,SEC61G,
3	56000000	56200000	19.9067	10	no	C_CDH	NA
31	12000000	12200000	20.1263	6	no	C_CDH	NA
9	400000	600000	20.1556	9	no	C_CDH	TSPAN10,PCYT2,ALYREF,ARHGDIA,P4HB,PPP1R27,MCRIP1,GCGR,ENSCAFG00000005812,HGS,ARL16,CCDC137,OXLD1,PDE6G,NPLOC4,ENSCAFG00000030278,
22	18800000	19000000	20.3024	10	no	C_CDH	NA
15	46200000	46400000	20.647	13	no	C_CDH	ARHGAP10,NR3C2,
15	29400000	29600000	20.7774	13	no	C_CDH	KITLG,
13	48400000	48600000	21.227	7	no	C_CDH	KIAA1211,AASDH,
15	30400000	30600000	21.6601	10	no	C_CDH	POC1B,ENSCAFG00000006110,ATP2B1,
18	11400000	11600000	23.569	9	no	C_CDH	ENSCAFG00000025443,ENSCAFG00000031742,
18	6200000	6400000	23.9444	13	no	C_CDH	LANCL2,VOPP1,
18	7200000	7400000	24.359	11	no	C_CDH	MRPL32,ENSCAFG00000003519,
15	29800000	30000000	25.2879	13	no	C_CDH	NA
15	26600000	26800000	26.1611	7	no	C_CDH	ENSCAFG00000029280,LRRIQ1,
15	50200000	50400000	28.2377	11	no	C_CDH	FBXW7,
15	29200000	29400000	29.2423	11	no	C_CDH	CEP290,TMTC3,ENSCAFG00000029427,
18	3800000	4000000	29.7417	6	no	C_CDH	NA
27	40800000	41000000	9.22543	12	no	C_CRD	ENSCAFG00000015395,PARP11,
19	5800000	6000000	9.41383	6	no	C_CRD	NA
15	10600000	10800000	9.51527	6	no	C_CRD	FAF1,ENSCAFG00000030863,
1	101800000	102000000	9.59527	6	no	C_CRD	NLRP5,NLRP8,NLRP13,ENSCAFG00000031113,
2	61800000	62000000	9.79212	13	no	C_CRD	FTO,
20	6200000	6400000	9.8754	8	no	C_CRD	PPARG,ENSCAFG00000028632,SYN2,TIMP4,
11	45400000	45600000	9.96263	10	no	C_CRD	ENSCAFG00000029839,EQTN,MOB3B,
4	52400000	52600000	10.0074	10	no	C_CRD	CLINT1,THG1L,SOX30,
1	44200000	44400000	10.0345	12	yes	C_CRD	IPCEF1,
9	42400000	42600000	10.1811	12	no	C_CRD	NLK,TMEM97,IFT20,TNFAIP1,POLDIP2,
4	62800000	63000000	10.1948	12	no	C_CRD	NA
13	13200000	13400000	10.2191	10	no	C_CRD	CSMD3,
1	6400000	6600000	10.2698	14	no	C_CRD	NA
24	23400000	23600000	10.4335	14	no	C_CRD	AHCY,ENSCAFG00000007508,ITCH,
29	15600000	15800000	10.5788	9	no	C_CRD	DNAJC5B,TRIM55,
6	42600000	42800000	10.6259	7	no	C_CRD	SARS,KIAA1324,C1orf194,TMEM167B,ENSCAFG00000031741,TAF13,WDR47,
9	21200000	21400000	10.6476	9	no	C_CRD	KRT9,KRT19,KRT15,KRT13,KRT36,KRT35,KRT32,KRT38,KRT41,KRT34,
15	46200000	46400000	10.6933	13	no	C_CRD	ARHGAP10,NR3C2,
28	22200000	22400000	10.7239	9	no	C_CRD	PDCD4,ENSCAFG00000030782,SHOC2,ADRA2A,
22	31000000	31200000	10.8126	14	no	C_CRD	SCEL,SLAIN1,
24	2000000	2200000	10.8919	11	no	C_CRD	ENSCAFG00000031316,XRN2,KIZ,
2	45600000	45800000	10.9154	15	no	C_CRD	RAB3C,
21	28000000	28200000	10.9177	8	no	C_CRD	cOR52A12,ENSCAFG00000032056,OR52A1,cOR51X4,OR51J1,ENSCAFG00000030672,OR51V1,ENSCAFG00000031701,ENSCAFG00000029518,ENSCAFG00000029568,ENSCAFG00000030286,ENSCAFG00000024181,
24	23000000	23200000	11.1114	8	no	C_CRD	CHMP4B,
15	34400000	34600000	11.1567	9	no	C_CRD	PLXNC1,CEP83,
8	26200000	26400000	11.4	9	no	C_CRD	LRR1,Rpl36a,MGAT2,DNAAF2,KLHDC1,KLHDC2,NEMF,
15	8800000	9000000	11.7391	7	no	C_CRD	GPX7,ZCCHC11,PRPF38A,ORC1,
5	80600000	80800000	11.8037	6	no	C_CRD	TANGO6,CDH1,
24	24000000	24200000	11.8217	9	no	C_CRD	GSS,MYH7B,TRPC4AP,EDEM2,PROCR,
20	38800000	39000000	11.8806	10	no	C_CRD	C3orf18,CACNA2D2,TMEM115,
22	18800000	19000000	11.8909	10	no	C_CRD	NA
15	15000000	15200000	12.0259	10	no	C_CRD	TESK2,TOE1,MUTYH,HPDL,ZSWIM5,
2	2600000	2800000	12.2073	10	no	C_CRD	PARD3,ENSCAFG00000003753,
25	3400000	3600000	12.5078	9	no	C_CRD	NA
9	800000	1000000	12.5404	9	no	C_CRD	SLC38A10,NDUFAF8,TEPSIN,CEP131,AATK,BAIAP2,CHMP6,
6	41400000	41600000	12.5422	13	no	C_CRD	KCNA2,KCNA10,ENSCAFG00000019784,PROK1,
30	2400000	2600000	12.6985	9	no	C_CRD	GJD2,ACTC1,ENSCAFG00000008260,AQR,
11	33200000	33400000	12.9091	12	no	C_CRD	TYRP1,LURAP1L,
25	3200000	3400000	13.2827	14	no	C_CRD	POSTN,
15	2200000	2400000	13.6713	6	no	C_CRD	KCNQ4,NFYC,RIMS3,
33	28800000	29000000	13.9341	6	no	C_CRD	LRCH3,FYTTD1,RUBCN,
9	400000	600000	14.7064	9	no	C_CRD	TSPAN10,PCYT2,ALYREF,ARHGDIA,P4HB,PPP1R27,MCRIP1,GCGR,ENSCAFG00000005812,HGS,ARL16,CCDC137,OXLD1,PDE6G,NPLOC4,ENSCAFG00000030278,
9	600000	800000	16.0095	10	no	C_CRD	NPLOC4,FAAP100,FSCN2,ACTG1,BAHCC1,
25	11000000	11200000	16.0341	11	no	C_CRD	SLC46A3,
10	7800000	8000000	17.8585	9	no	C_CRD	LEMD3,MSRB3,
2	53600000	53800000	18.4542	13	no	C_CRD	NA
2	2400000	2600000	18.4594	11	yes	C_CRD	PARD3,
4	74400000	74600000	18.5348	9	no	C_CRD	NA
15	33400000	33600000	20.8526	12	no	C_CRD	NA
10	8000000	8200000	21.5973	11	no	C_CRD	MSRB3,
14	27000000	27200000	11.7222	10	no	C_GXH	TMEM106B,
1	98600000	98800000	11.7824	11	no	C_GXH	SUSD3,FGD3,BICD2,IPPK,
14	3800000	4000000	11.8861	14	no	C_GXH	EXOC4,
12	48800000	49000000	11.9482	8	no	C_GXH	ANKRD6,LYRM2,MDN1,
4	34200000	34400000	12.1611	7	no	C_GXH	WAPL,OPN4,LDB3,
1	87600000	87800000	12.2141	12	no	C_GXH	C9orf135,PTAR1,
15	32800000	33000000	12.3415	13	no	C_GXH	NA
25	3200000	3400000	12.5763	14	no	C_GXH	POSTN,
36	15800000	16000000	12.6647	7	no	C_GXH	METTL8,DCAF17,CYBRD1,
8	50600000	50800000	12.6791	12	no	C_GXH	ADCK1,
2	12800000	13000000	12.7213	11	no	C_GXH	PLXDC2,
31	16600000	16800000	12.9134	12	no	C_GXH	NA
1	76400000	76600000	13.1166	7	no	C_GXH	RASEF,
24	3600000	3800000	13.1853	10	no	C_GXH	SLC24A3,
16	18800000	19000000	13.3069	11	no	C_GXH	NA
1	6400000	6600000	13.4592	14	no	C_GXH	NA
16	33800000	34000000	13.55	9	no	C_GXH	RBPMS,
20	38800000	39000000	13.7361	10	no	C_GXH	C3orf18,CACNA2D2,TMEM115,
28	8600000	8800000	13.7615	7	no	C_GXH	TBC1D12,HELLS,CYP2C18,PDLIM1,
21	4200000	4400000	13.803	8	no	C_GXH	NA
27	6200000	6400000	13.848	9	no	C_GXH	cOR8T4,cOR8T2,OR12B11,ZNF641,H1FNT,
20	30200000	30400000	14.0436	7	no	C_GXH	NA
1	101800000	102000000	14.2464	6	no	C_GXH	NLRP5,NLRP8,NLRP13,ENSCAFG00000031113,
10	7800000	8000000	14.2939	9	no	C_GXH	LEMD3,MSRB3,
17	1800000	2000000	14.3094	16	no	C_GXH	EIPR1,TRAPPC12,
20	43600000	43800000	14.4402	12	no	C_GXH	ATP13A1,GMIP,LPAR2,PBX4,CILP2,YJEFN3,NDUFA13,TSSK6,GATAD2A,
27	40800000	41000000	14.5585	12	no	C_GXH	ENSCAFG00000015395,PARP11,
2	77800000	78000000	14.5921	6	no	C_GXH	RPL22,EIF4G3,
20	48400000	48600000	14.7206	10	no	C_GXH	C19orf57,ASF1B,PRKACA,SAMD1,C19orf67,ENSCAFG00000016500,PALM3,IL27RA,RFX1,DCAF15,PODNL1,CC2D1A,NANOS3,
15	40800000	41000000	14.8186	7	no	C_GXH	CCDC53,NUP37,PARPBP,
10	8000000	8200000	15.1469	11	no	C_GXH	MSRB3,
28	200000	400000	15.2834	14	no	C_GXH	ENSCAFG00000028974,MAPK8,
6	37600000	37800000	15.4956	6	no	C_GXH	SLX4,NLRC3,CLUAP1,C16orf90,NAA60,ZNF597,
3	1000000	1200000	15.6943	12	no	C_GXH	NREP,ENSCAFG00000031165,STARD4,CAMK4,
18	3800000	4000000	15.7717	6	no	C_GXH	NA
1	100800000	101000000	15.8522	10	no	C_GXH	AURKC,ZNF264,DUXA,
9	3800000	4000000	16.0396	6	no	C_GXH	MGAT5B,
18	15200000	15400000	16.1661	12	no	C_GXH	SRPK2,KMT2E,
18	9800000	10000000	17.1735	8	no	C_GXH	CDK13,
12	44600000	44800000	17.9057	10	no	C_GXH	NA
26	0	200000	17.907	14	no	C_GXH	ANHX,ZNF268,ZNF10,ZNF140,ENSCAFG00000024332,ZNF26,
26	200000	400000	18.2023	16	no	C_GXH	ZNF26,ZNF605,CHFR,GOLGA3,ANKLE2,
5	43200000	43400000	18.7693	7	no	C_GXH	IL12RB2,IL23R,
15	50200000	50400000	18.7927	11	no	C_GXH	FBXW7,
24	3800000	4000000	19.139	15	no	C_GXH	NA
26	400000	600000	19.3253	9	no	C_GXH	ANKLE2,PGAM5,PXMP2,POLE,P2RX2,LRCOL1,FBRSL1,ENSCAFG00000032366,
4	74400000	74600000	19.823	9	no	C_GXH	NA
15	10600000	10800000	20.5473	6	no	C_GXH	FAF1,ENSCAFG00000030863,
5	3200000	3400000	22.665	9	no	C_GXH	NA
18	17000000	17200000	25.8693	6	no	C_GXH	ENSCAFG00000004247,FBXL13,LRRC17,
8	7000000	7200000	12.5245	7	no	C_HTM	ENSCAFG00000012522,
16	51200000	51400000	12.532	10	no	C_HTM	NA
14	9800000	10000000	12.5876	12	yes	C_HTM	NA
16	18800000	19000000	12.6395	11	no	C_HTM	NA
9	57200000	57400000	12.7401	12	no	C_HTM	PBX3,
37	18600000	18800000	12.7695	8	no	C_HTM	ENSCAFG00000023462,
2	34400000	34600000	12.7704	8	no	C_HTM	DIP2C,ZMYND11,
12	43400000	43600000	12.8189	13	no	C_HTM	UBE3D,DOPEY1,PGM3,
15	33600000	33800000	12.9511	6	no	C_HTM	ENSCAFG00000006166,NUDT4,ENSCAFG00000006177,ENSCAFG00000030257,SOCS2,
25	11000000	11200000	13.2095	11	no	C_HTM	SLC46A3,
4	74600000	74800000	13.2394	7	no	C_HTM	NPR3,
6	47200000	47400000	13.2961	6	no	C_HTM	NA
3	73000000	73200000	13.3098	11	no	C_HTM	KLB,RFC1,WDR19,
26	1000000	1200000	13.4551	7	no	C_HTM	ENSCAFG00000006533,SFSWAP,
4	22000000	22200000	13.4805	9	no	C_HTM	UNC5B,SLC29A3,CDH23,
18	42600000	42800000	13.5219	8	no	C_HTM	C11orf49,LRP4,CKAP5,F2,
5	31800000	32000000	13.5532	13	no	C_HTM	ZMYND15,CXCL16,MED11,ARRB2,PELP1,RNASEK,ALOX15,
15	40800000	41000000	13.7139	7	no	C_HTM	CCDC53,NUP37,PARPBP,
8	7800000	8000000	13.7589	6	no	C_HTM	NA
4	18600000	18800000	13.779	10	no	C_HTM	ENSCAFG00000024412,
15	16800000	17000000	13.8665	9	no	C_HTM	CDC20,ELOVL1,MPL,TIE1,C1orf210,ENSCAFG00000031642,TMEM125,CFAP57,EBNA1BP2,ENSCAFG00000005339,ENSCAFG00000030728,
3	41800000	42000000	14.0813	17	no	C_HTM	IGF1R,
11	45800000	46000000	14.1509	9	no	C_HTM	LINGO2,
35	2400000	2600000	14.5141	12	no	C_HTM	GMDS,
12	22400000	22600000	14.5762	7	no	C_HTM	HCRTR2,
12	7400000	7600000	14.5844	14	yes	C_HTM	ENSCAFG00000001492,GLO1,
21	28000000	28200000	14.675	8	no	C_HTM	cOR52A12,ENSCAFG00000032056,OR52A1,cOR51X4,OR51J1,ENSCAFG00000030672,OR51V1,ENSCAFG00000031701,ENSCAFG00000029518,ENSCAFG00000029568,ENSCAFG00000030286,ENSCAFG00000024181,
12	33400000	33600000	15.2905	12	no	C_HTM	B3GAT2,
6	57000000	57200000	15.3077	9	no	C_HTM	TGFBR3,
9	40400000	40600000	15.3159	9	no	C_HTM	MYO1D,CDK5R1,ENSCAFG00000031969,PSMD11,ZNF207,
13	43200000	43400000	15.5606	14	yes	C_HTM	GABRB1,COMMD8,
19	37800000	38000000	15.6131	14	no	C_HTM	MAP3K19,RAB3GAP1,
13	42600000	42800000	15.7485	11	no	C_HTM	NA
5	32000000	32200000	16.037	8	no	C_HTM	RNASEK,ALOX12,C5H17orf49,BCL6B,SLC16A13,SLC16A11,ENSCAFG00000023018,ENSCAFG00000015995,ACADVL,DVL2,PHF23,
12	7200000	7400000	16.2013	15	no	C_HTM	ENSCAFG00000001492,
4	10800000	11000000	16.2327	9	no	C_HTM	BICC1,
8	10200000	10400000	16.3184	7	no	C_HTM	COCH,STRN3,
15	33400000	33600000	16.9367	12	no	C_HTM	NA
8	45800000	46000000	17.0541	10	no	C_HTM	RGS6,
11	7800000	8000000	17.3316	6	no	C_HTM	NA
17	6000000	6200000	17.9164	10	no	C_HTM	KIDINS220,MBOAT2,
8	52600000	52800000	17.9536	10	no	C_HTM	ENSCAFG00000032243,
22	50000000	50200000	18.1705	11	no	C_HTM	PCCA,
6	2000000	2200000	18.5106	6	no	C_HTM	CALN1,GALNT17,
2	35200000	35400000	19.3993	15	no	C_HTM	NRG2,ENSCAFG00000005735,
26	800000	1000000	20.4241	9	no	C_HTM	NOC4L,DDX51,EP400,PUS1,ULK1,
31	200000	400000	23.9044	9	no	C_HTM	ENSCAFG00000024833,CGGBP1,HTR1F,
15	39400000	39600000	24.3057	7	no	C_HTM	SCYL2,SLC17A8,NR1H4,ENSCAFG00000031488,
3	52800000	53000000	26.1306	7	no	C_HTM	AP3S2,ARPIN,
28	6200000	6400000	26.6011	9	no	C_HTM	ENSCAFG00000007285,ENSCAFG00000007296,TNKS2,
5	5000000	5200000	15.266	14	no	C_LSH	TMEM45B,
5	63800000	64000000	15.2665	12	no	C_LSH	FANCA,ENSCAFG00000028840,ZNF276,VPS9D1,SPATA2L,CDK10,SPATA33,CHMP1A,DPEP1,CPNE7,RPL13,SPG7,
5	74000000	74200000	15.3005	8	no	C_LSH	ENSCAFG00000029744,
20	5400000	5600000	15.3524	7	no	C_LSH	TMCC1,PLXND1,
36	2200000	2400000	15.5106	8	no	C_LSH	NA
4	74400000	74600000	15.7453	9	no	C_LSH	NA
11	20400000	20600000	15.8305	10	no	C_LSH	P4HA2,PDLIM4,SLC22A4,
32	33800000	34000000	15.9336	6	no	C_LSH	ENSCAFG00000030808,
4	33000000	33200000	15.9775	13	no	C_LSH	NA
19	16400000	16600000	16.0839	13	no	C_LSH	NA
14	15600000	15800000	16.2533	15	no	C_LSH	NA
4	74600000	74800000	16.3788	7	no	C_LSH	NPR3,
5	4200000	4400000	16.4293	7	no	C_LSH	NA
10	7800000	8000000	16.4534	9	no	C_LSH	LEMD3,MSRB3,
14	26800000	27000000	16.4633	11	no	C_LSH	ENSCAFG00000009915,
4	67200000	67400000	16.6226	12	no	C_LSH	NA
20	54000000	54200000	17.0524	12	no	C_LSH	RFX2,RANBP3,CAPS,VMAC,NDUFA11,
30	28000000	28200000	17.1035	10	no	C_LSH	USP3,FBXL22,HERC1,
4	68600000	68800000	17.1536	12	no	C_LSH	PRKAA1,TTC33,PTGER4,
23	32800000	33000000	17.194	10	no	C_LSH	STAG1,
20	29400000	29600000	17.197	12	no	C_LSH	ENSCAFG00000007181,
23	2600000	2800000	17.2593	17	no	C_LSH	ABHD5,ENSCAFG00000031044,ANO10,
23	2800000	3000000	17.3134	15	no	C_LSH	ANO10,SNRK,
9	400000	600000	17.3662	9	no	C_LSH	TSPAN10,PCYT2,ALYREF,ARHGDIA,P4HB,PPP1R27,MCRIP1,GCGR,ENSCAFG00000005812,HGS,ARL16,CCDC137,OXLD1,PDE6G,NPLOC4,ENSCAFG00000030278,
18	6400000	6600000	17.4476	13	no	C_LSH	BLVRA,COA1,STK17A,
36	2600000	2800000	17.5967	10	no	C_LSH	GPD2,
36	2800000	3000000	17.6155	11	no	C_LSH	NA
16	400000	600000	17.7645	11	no	C_LSH	TNS3,
5	62200000	62400000	17.8976	7	no	C_LSH	RERE,ENO1,CA6,
15	18400000	18600000	18.0302	6	no	C_LSH	SUPT16H,CHD8,RAB2B,TOX4,METTL3,SALL2,
6	49800000	50000000	18.289	12	no	C_LSH	DBT,LRRC39,ENSCAFG00000020021,SASS6,MFSD14A,SLC35A3,
20	29800000	30000000	18.4844	6	no	C_LSH	NA
36	1800000	2000000	18.7861	8	no	C_LSH	NA
5	31000000	31200000	19.1579	14	no	C_LSH	WSCD1,ENSCAFG00000031597,
14	37400000	37600000	19.2719	11	no	C_LSH	STK31,ENSCAFG00000029342,
2	73400000	73600000	19.9071	8	no	C_LSH	ZDHHC18,ARID1A,RPS6KA1,HMGN2,DHDDS,
26	28400000	28600000	20.7528	12	no	C_LSH	CABIN1,ENSCAFG00000014028,ENSCAFG00000014034,GSTTP1,ENSCAFG00000028814,ENSCAFG00000014043,
3	85800000	86000000	21.2149	14	no	C_LSH	NA
5	63400000	63600000	21.2825	14	no	C_LSH	KIF1B,ENSCAFG00000024062,ENSCAFG00000019801,GAS8,
5	2800000	3000000	21.5365	8	no	C_LSH	NTM,
36	4600000	4800000	21.6731	10	no	C_LSH	DAPL1,
1	26000000	26200000	22.1206	14	no	C_LSH	NA
15	200000	400000	24.0195	7	no	C_LSH	ENSCAFG00000002484,ENSCAFG00000002485,cOR13P3,ENSCAFG00000002488,ENSCAFG00000002491,
5	63600000	63800000	24.0491	12	no	C_LSH	GAS8,DBNDD1,DEF8,TUBB3,TCF25,SPIRE2,FANCA,ENSCAFG00000028840,
20	30000000	30200000	24.4596	9	no	C_LSH	NA
5	3200000	3400000	25.0543	9	no	C_LSH	NA
5	62600000	62800000	25.9235	11	no	C_LSH	SPSB1,SLC25A33,
5	63000000	63200000	26.5362	13	no	C_LSH	CLSTN1,CTNNBIP1,LZIC,NMNAT1,RBP7,
5	4400000	4600000	28.2164	9	no	C_LSH	ADAMTS15,ADAMTS8,
5	62400000	62600000	29.4445	12	no	C_LSH	SLC2A5,GPR157,H6PD,
14	19200000	19400000	12.8643	7	no	C_LzD	TFPI2,
13	54200000	54400000	12.8848	13	no	C_LzD	NA
12	58600000	58800000	12.9594	9	no	C_LzD	ASCC3,
16	4000000	4200000	12.9808	6	no	C_LzD	NA
16	23600000	23800000	12.9812	9	no	C_LzD	KAT6A,
14	26800000	27000000	13.103	11	no	C_LzD	ENSCAFG00000009915,
37	400000	600000	13.2098	10	no	C_LzD	ASNSD1,ANKAR,OSGEPL1,ORMDL1,PMS1,ENSCAFG00000024655,
34	200000	400000	13.3545	16	no	C_LzD	FAM105A,TRIO,
24	2000000	2200000	13.5234	11	no	C_LzD	ENSCAFG00000031316,XRN2,KIZ,
34	2000000	2200000	13.524	12	no	C_LzD	NA
22	8400000	8600000	13.553	8	no	C_LzD	AKAP11,DGKH,
22	18800000	19000000	13.5884	10	no	C_LzD	NA
9	600000	800000	13.6935	10	no	C_LzD	NPLOC4,FAAP100,FSCN2,ACTG1,BAHCC1,
13	1400000	1600000	13.7315	9	no	C_LzD	VPS13B,
11	62600000	62800000	13.7946	12	yes	C_LzD	RAD23B,
6	7400000	7600000	13.8294	10	no	C_LzD	MDH2,SRRM3,HSPB1,YWHAG,SSC4D,ZP3,
19	24400000	24600000	13.9857	14	no	C_LzD	ENSCAFG00000004632,
16	18800000	19000000	14.0692	11	no	C_LzD	NA
18	27400000	27600000	14.2626	15	no	C_LzD	NA
18	13800000	14000000	14.3672	12	no	C_LzD	NA
18	22200000	22400000	14.7498	12	no	C_LzD	PCLO,
14	15600000	15800000	14.8938	15	no	C_LzD	NA
23	26800000	27000000	14.9383	6	no	C_LzD	ANKRD28,
25	3200000	3400000	14.997	14	no	C_LzD	POSTN,
1	67800000	68000000	15.2188	13	no	C_LzD	LAMA2,
3	52800000	53000000	15.4259	7	no	C_LzD	AP3S2,ARPIN,
18	22400000	22600000	15.5083	12	no	C_LzD	PCLO,
34	1200000	1400000	15.5751	16	no	C_LzD	NA
1	94400000	94600000	15.7794	8	no	C_LzD	ENSCAFG00000002155,
34	800000	1000000	16.1896	11	no	C_LzD	DNAH5,
12	43800000	44000000	16.405	6	no	C_LzD	PRSS35,SNAP91,
25	2600000	2800000	16.553	8	no	C_LzD	NA
12	7000000	7200000	17.4122	8	no	C_LzD	ZFAND3,
5	63600000	63800000	17.4571	12	no	C_LzD	GAS8,DBNDD1,DEF8,TUBB3,TCF25,SPIRE2,FANCA,ENSCAFG00000028840,
34	1600000	1800000	17.7969	8	no	C_LzD	NA
18	25600000	25800000	18.4823	10	yes	C_LzD	PTDSS2,RNH1,HRAS,LRRC56,LMNTD2,ENSCAFG00000028503,RASSF7,PHRF1,ENSCAFG00000006557,DEAF1,TMEM80,EPS8L2,TALDO1,PDDC1,CEND1,
30	8200000	8400000	19.4942	10	no	C_LzD	INO80,EXD1,CHP1,OIP5,NUSAP1,
34	1400000	1600000	19.5581	14	no	C_LzD	NA
34	1000000	1200000	20.4145	17	no	C_LzD	DNAH5,
12	44000000	44200000	20.6173	6	no	C_LzD	SNAP91,RIPPLY2,CYB5R4,
24	4000000	4200000	20.8984	12	no	C_LzD	NA
14	34400000	34600000	21.5474	7	no	C_LzD	ITGB8,
6	25800000	26000000	21.6864	13	no	C_LzD	TMC5,TMC7,COQ7,ITPRIPL2,
24	4200000	4400000	21.776	11	no	C_LzD	SCP2D1,
12	43400000	43600000	22.5021	13	no	C_LzD	UBE3D,DOPEY1,PGM3,
1	93400000	93600000	22.7146	7	no	C_LzD	JAK2,INSL6,CD274,ENSCAFG00000002115,PLGRKT,
5	37800000	38000000	23.013	7	no	C_LzD	COX10,ENSCAFG00000017901,
19	13600000	13800000	27.5817	11	no	C_LzD	ENSCAFG00000005164,
12	43600000	43800000	34.3303	10	no	C_LzD	PGM3,RWDD2A,ME1,ENSCAFG00000002945,
19	13400000	13600000	42.99	12	no	C_LzD	NA
1	10000000	10200000	12.8058	7	no	C_MGX	ENSCAFG00000000044,
2	49200000	49400000	13.0053	12	no	C_MGX	ENSCAFG00000007256,
8	29200000	29400000	13.0152	12	no	C_MGX	DDHD1,
8	2800000	3000000	13.0493	11	no	C_MGX	TRDC,TRDV3,TRAC,DAD1,ABHD4,
1	2000000	2200000	13.0696	7	no	C_MGX	NA
7	26400000	26600000	13.0987	16	no	C_MGX	SUCO,ENSCAFG00000024583,ENSCAFG00000014695,PIGC,DNM3,
10	28400000	28600000	13.1484	7	yes	C_MGX	RBFOX2,APOL5,APOL6,MB,
1	57400000	57600000	13.3387	12	no	C_MGX	VGLL2,ROS1,
32	5000000	5200000	13.5122	11	yes	C_MGX	C4orf22,
22	3000000	3200000	13.5846	10	no	C_MGX	RCBTB2,RB1,LPAR6,
22	1600000	1800000	13.7265	12	no	C_MGX	NA
9	3000000	3200000	13.7266	13	no	C_MGX	TMC6,TNRC6C,ENSCAFG00000031705,ENSCAFG00000030116,
1	78600000	78800000	13.7565	10	no	C_MGX	ENSCAFG00000023307,
1	23800000	24000000	13.8574	12	no	C_MGX	MEX3C,SMAD4,ELAC1,ME2,
5	2800000	3000000	13.9281	8	no	C_MGX	NTM,
15	9000000	9200000	13.9998	9	no	C_MGX	CC2D1B,ZFYVE9,ENSCAFG00000028969,
22	0	200000	14.1047	8	no	C_MGX	ENSCAFG00000024550,ALG11,ATP7B,
22	28800000	29000000	14.1328	10	no	C_MGX	NA
32	4800000	5000000	14.4464	12	yes	C_MGX	C4orf22,
8	3000000	3200000	14.4843	8	no	C_MGX	ABHD4,OXA1L,SLC7A7,MRPL52,MMP14,
10	29800000	30000000	14.5183	11	no	C_MGX	LARGE1,
4	79400000	79600000	14.5432	9	no	C_MGX	NA
20	22200000	22400000	14.6983	16	no	C_MGX	NA
4	64400000	64600000	14.7467	13	no	C_MGX	EMB,
38	8400000	8600000	14.8039	10	no	C_MGX	BRINP3,
27	44000000	44200000	15.1191	14	no	C_MGX	DCP1B,ENSCAFG00000016001,CACNA1C,
1	57200000	57400000	15.1774	12	no	C_MGX	GPRC6A,RFX6,
15	48600000	48800000	15.5613	8	no	C_MGX	LRBA,
30	21400000	21600000	15.5883	9	no	C_MGX	RFX7,TEX9,
5	60800000	61000000	15.7174	9	no	C_MGX	CAMTA1,
22	1400000	1600000	16.1319	6	no	C_MGX	ENSCAFG00000004303,
10	28600000	28800000	16.1848	11	yes	C_MGX	RASD2,MCM5,HMOX1,TOM1,
15	48800000	49000000	16.6065	7	no	C_MGX	LRBA,
6	3600000	3800000	16.7031	13	no	C_MGX	NA
1	58000000	58200000	17.366	9	no	C_MGX	NA
34	200000	400000	17.7564	16	no	C_MGX	FAM105A,TRIO,
22	2600000	2800000	18.0085	13	no	C_MGX	FNDC3A,
6	3200000	3400000	18.2606	6	no	C_MGX	NA
24	23000000	23200000	18.5951	8	no	C_MGX	CHMP4B,
14	12400000	12600000	18.7033	9	no	C_MGX	NA
9	58400000	58600000	18.9378	13	no	C_MGX	NR6A1,NR5A1,ENSCAFG00000029622,PSMB7,NEK6,
27	44200000	44400000	21.8178	20	no	C_MGX	CACNA1C,ENSCAFG00000016073,
32	5200000	5400000	21.9214	14	yes	C_MGX	BMP3,PRKG2,
32	4600000	4800000	22.1531	10	yes	C_MGX	C4orf22,
22	2000000	2200000	22.2933	17	no	C_MGX	KPNA3,ENSCAFG00000031710,EBPL,ENSCAFG00000010362,RCBTB1,
22	1800000	2000000	22.5401	12	no	C_MGX	KCNRG,TRIM13,SPRYD7,
22	2200000	2400000	24.0203	15	no	C_MGX	RCBTB1,PHF11,SETDB2,CAB39L,
22	2800000	3000000	24.3771	13	no	C_MGX	CYSLTR2,
16	2600000	2800000	31.1209	10	no	C_MGX	ENSCAFG00000003479,ENSCAFG00000025531,
16	2400000	2600000	32.4758	7	no	C_MGX	ENSCAFG00000003479,
4	18000000	18200000	12.5121	11	no	C_QCH	ENSCAFG00000013221,ENSCAFG00000013264,
25	4000000	4200000	12.514	11	no	C_QCH	CCNA1,
35	2200000	2400000	12.6507	10	no	C_QCH	GMDS,
20	21000000	21200000	12.7547	9	no	C_QCH	FOXP1,
7	37200000	37400000	12.8788	7	no	C_QCH	ENSCAFG00000015864,TFB2M,CNST,
25	10400000	10600000	12.9646	11	no	C_QCH	MTUS2,
30	1400000	1600000	12.9695	11	no	C_QCH	RYR3,
12	41400000	41600000	13.0597	12	no	C_QCH	NA
2	46400000	46600000	13.1508	8	no	C_QCH	NA
20	35200000	35400000	13.2945	8	no	C_QCH	CACNA2D3,LRTM1,
20	23000000	23200000	13.3031	9	no	C_QCH	FAM19A1,
20	22600000	22800000	13.3261	15	no	C_QCH	LMOD3,ARL6IP5,UBA3,TMF1,EOGT,
14	7200000	7400000	13.4014	7	no	C_QCH	NRF1,STRIP2,AHCYL2,
6	17600000	17800000	13.6116	13	no	C_QCH	ZNF768,ITGAL,DCTPP1,ZNF771,ZNF48,SEPT1,MYLPF,TBC1D10B,ENSCAFG00000031476,CD2BP2,SPN,QPRT,
1	112800000	113000000	13.6835	6	no	C_QCH	CYP2B6,ENSCAFG00000005065,CYP2A7,CYP2A13,EGLN2,CYP2F1,ENSCAFG00000023820,
2	61800000	62000000	13.7109	13	no	C_QCH	FTO,
14	43000000	43200000	13.8546	13	no	C_QCH	NOD1,
13	16200000	16400000	14.0691	11	yes	C_QCH	EIF3H,UTP23,RAD21,
18	24200000	24400000	14.0762	7	no	C_QCH	SEMA3D,
9	14200000	14400000	14.1816	6	no	C_QCH	ENSCAFG00000025074,ENSCAFG00000029256,
5	40200000	40400000	14.3074	12	no	C_QCH	AKAP10,ULK2,
11	52600000	52800000	14.3703	9	no	C_QCH	RECK,GLIPR2,CCIN,CLTA,GNE,RNF38,
5	63800000	64000000	14.4094	12	no	C_QCH	FANCA,ENSCAFG00000028840,ZNF276,VPS9D1,SPATA2L,CDK10,SPATA33,CHMP1A,DPEP1,CPNE7,RPL13,SPG7,
17	4800000	5000000	14.4164	12	no	C_QCH	NA
20	22800000	23000000	14.4972	7	no	C_QCH	FAM19A4,
7	29600000	29800000	14.8391	7	no	C_QCH	NA
19	35600000	35800000	15.4537	13	no	C_QCH	LYPD1,NCKAP5,
18	53400000	53600000	15.515	6	no	C_QCH	ENSCAFG00000028906,RARRES3,LGALS12,HRASLS5,ENSCAFG00000015226,SLC22A10,
20	30200000	30400000	15.5309	7	no	C_QCH	NA
25	11800000	12000000	15.6348	10	no	C_QCH	GSX1,POLR1D,
19	3000000	3200000	15.8495	9	no	C_QCH	MAML3,ENSCAFG00000003702,SETD7,
2	54600000	54800000	15.8829	11	no	C_QCH	SMN,BDP1,MCCC2,
17	3200000	3400000	16.1621	8	no	C_QCH	NA
20	21200000	21400000	16.4084	13	yes	C_QCH	NA
10	8000000	8200000	16.5412	11	no	C_QCH	MSRB3,
5	63400000	63600000	16.7055	14	no	C_QCH	KIF1B,ENSCAFG00000024062,ENSCAFG00000019801,GAS8,
5	62600000	62800000	16.8019	11	no	C_QCH	SPSB1,SLC25A33,
28	28800000	29000000	17.4084	17	yes	C_QCH	PRLHR,
10	7800000	8000000	17.9934	9	no	C_QCH	LEMD3,MSRB3,
1	7600000	7800000	18.6342	7	no	C_QCH	NA
1	10400000	10600000	18.7458	7	no	C_QCH	NA
15	19400000	19600000	18.9302	10	no	C_QCH	OSBPL8,
13	17400000	17600000	18.9619	8	yes	C_QCH	EXT1,
5	62400000	62600000	18.9856	12	no	C_QCH	SLC2A5,GPR157,H6PD,
5	62200000	62400000	20.1126	7	no	C_QCH	RERE,ENO1,CA6,
5	63600000	63800000	20.1383	12	no	C_QCH	GAS8,DBNDD1,DEF8,TUBB3,TCF25,SPIRE2,FANCA,ENSCAFG00000028840,
25	9400000	9600000	20.2698	9	no	C_QCH	USPL1,HMGB1,
20	21400000	21600000	21.3168	13	yes	C_QCH	MDFIC2,
5	63000000	63200000	25.2019	13	no	C_QCH	CLSTN1,CTNNBIP1,LZIC,NMNAT1,RBP7,
3	41800000	42000000	36.2641	17	no	C_QCH	IGF1R,
3	24600000	24800000	14.1273	9	no	C_SDX	NA
29	8000000	8200000	14.1445	12	yes	C_SDX	IMPAD1,
5	51000000	51200000	14.2797	9	no	C_SDX	MYSM1,OMA1,
3	3000000	3200000	14.3556	7	no	C_SDX	FER,ENSCAFG00000032321,
15	48800000	49000000	14.6007	7	no	C_SDX	LRBA,
2	29400000	29600000	14.6089	6	no	C_SDX	PRKCQ,
34	26400000	26600000	14.675	6	no	C_SDX	IFT80,SMC4,TRIM59,KPNA4,
29	8800000	9000000	14.6796	12	yes	C_SDX	NA
3	28600000	28800000	14.7042	11	no	C_SDX	AP3B1,
1	2200000	2400000	14.7356	11	no	C_SDX	NA
23	16000000	16200000	14.9476	12	no	C_SDX	CMC1,
1	2000000	2200000	15.2541	7	no	C_SDX	NA
7	45600000	45800000	15.3299	10	no	C_SDX	NA
21	5200000	5400000	15.4803	8	no	C_SDX	MTMR2,CEP57,FAM76B,
25	7800000	8000000	15.5162	12	no	C_SDX	ZAR1L,FRY,
11	25800000	26000000	15.5744	10	no	C_SDX	BRD8,KIF20A,CDC23,GFRA3,CDC25C,SLBP2,FAM53C,KDM3B,
13	44000000	44200000	15.6249	11	no	C_SDX	TEC,SLAIN2,
29	1800000	2000000	15.6423	16	no	C_SDX	NA
1	1000000	1200000	15.6815	13	no	C_SDX	NFATC1,ATP9B,
1	77800000	78000000	15.788	11	no	C_SDX	NA
1	106600000	106800000	16.0882	9	no	C_SDX	MYH14,VRK3,SIGLEC11,ATF5,NUP62,IL4I1,TBC1D17,AKT1S1,PNKP,PTOV1,MED25,FUZ,AP2A1,TSKS,
15	1000000	1200000	16.1228	6	no	C_SDX	FOXJ3,GUCA2A,GUCA2B,
18	26000000	26200000	16.1627	10	no	C_SDX	HSD17B12,
25	1600000	1800000	16.2117	15	no	C_SDX	LHFPL6,
11	27400000	27600000	16.367	6	no	C_SDX	UHRF2,GLDC,
14	27000000	27200000	16.5984	10	no	C_SDX	TMEM106B,
16	33200000	33400000	17.0646	9	no	C_SDX	WRN,PURG,
1	75200000	75400000	17.1452	11	no	C_SDX	NA
7	62400000	62600000	17.1893	8	yes	C_SDX	TAF4B,PSMA8,SS18,
8	7400000	7600000	17.3902	9	no	C_SDX	NA
24	34200000	34400000	17.5663	10	no	C_SDX	EYA2,ZMYND8,
13	37600000	37800000	17.8924	8	no	C_SDX	SHARPIN,ENSCAFG00000001540,ENSCAFG00000032656,HGH1,ENSCAFG00000001542,MROH1,VPS28,BOP1,ENSCAFG00000001559,HSF1,DGAT1,TMEM249,SLC52A2,FBXL6,
9	43800000	44000000	18.0144	11	no	C_SDX	SSH2,EFCAB5,
17	52600000	52800000	18.1685	12	no	C_SDX	SYCP1,RPL36AL,TSHB,TSPAN2,
9	20600000	20800000	18.3556	10	no	C_SDX	STAT3,STAT5A,STAT5B,GHDC,HCRT,KCNH4,RAB5C,HSPB9,KAT2A,DHX58,
9	11000000	11200000	18.9282	9	no	C_SDX	TANC2,
5	60800000	61000000	19.6136	9	no	C_SDX	CAMTA1,
5	33200000	33400000	20.0268	12	no	C_SDX	NDEL1,MYH10,
26	16400000	16600000	20.0506	11	no	C_SDX	DYNLL1,COQ5,RNF10,POP5,ENSCAFG00000010401,MLEC,UNC119B,ACADS,
3	28400000	28600000	20.631	11	no	C_SDX	SCAMP1,AP3B1,
1	78600000	78800000	22.0368	10	no	C_SDX	ENSCAFG00000023307,
27	43600000	43800000	22.6363	6	no	C_SDX	FBXL14,ENSCAFG00000031884,WNT5B,ADIPOR2,
21	4200000	4400000	23.3129	8	no	C_SDX	NA
29	6600000	6800000	23.6781	15	no	C_SDX	XKR4,
9	21200000	21400000	25.8757	9	no	C_SDX	KRT9,KRT19,KRT15,KRT13,KRT36,KRT35,KRT32,KRT38,KRT41,KRT34,
1	800000	1000000	26.401	10	no	C_SDX	PQLC1,ENSCAFG00000032297,ENSCAFG00000028976,CTDP1,
13	37800000	38000000	27.6233	9	no	C_SDX	SHARPIN,VPS28,ADCK5,CPSF1,SLC39A4,TONSL,CYHR1,KIFC2,FOXH1,PPP1R16A,GPT,MFSD3,RECQL4,LRRC24,LRRC14,ENSCAFG00000030437,ARHGAP39,
1	84400000	84600000	28.2546	12	no	C_SDX	NA
13	38000000	38200000	30.0277	8	no	C_SDX	COMMD5,ZNF7,ZNF517,RPL8,ZNF34,ZNF250,ZNF16,ZNF252,
7	45800000	46000000	31.9598	10	no	C_SDX	SETBP1,
8	54600000	54800000	15.6653	12	no	C_SrP	NA
14	55400000	55600000	15.6686	7	no	C_SrP	CAV2,ENSCAFG00000030167,CAV1,MET,
4	75000000	75200000	15.7385	10	no	C_SrP	ZFR,MTMR12,
33	4200000	4400000	15.7919	11	no	C_SrP	EPHA6,
13	22200000	22400000	15.8203	12	no	C_SrP	FER1L6,
4	74400000	74600000	15.9147	9	no	C_SrP	NA
24	17600000	17800000	16.0427	18	no	C_SrP	ADAM33,SIGLEC1,HSPA12B,ENSCAFG00000030551,GFRA4,ATRN,
25	8000000	8200000	16.1104	10	no	C_SrP	FRY,
13	3000000	3200000	16.1281	8	no	C_SrP	NA
18	0	200000	16.2147	7	no	C_SrP	SUN3,C7orf57,UPP1,ABCA13,
17	49400000	49600000	16.2304	9	no	C_SrP	ALMS1,ENSCAFG00000008835,EGR4,FBXO41,
13	23600000	23800000	16.3934	11	no	C_SrP	NA
13	21400000	21600000	16.8596	14	no	C_SrP	DERL1,TBC1D31,FAM83A,C13H8orf76,
13	22600000	22800000	17.0724	10	no	C_SrP	TATDN1,NDUFB9,MTSS1,
13	22000000	22200000	17.229	11	no	C_SrP	ANXA13,FAM91A1,FER1L6,
13	19200000	19400000	17.2334	8	no	C_SrP	COL14A1,MRPL13,MTBP,SNTB1,
13	24800000	25000000	17.2564	12	no	C_SrP	NA
10	8000000	8200000	17.3085	11	no	C_SrP	MSRB3,
2	65200000	65400000	17.5996	9	no	C_SrP	HEATR3,CNEP1R1,ENSCAFG00000009226,ENSCAFG00000023585,
13	22400000	22600000	17.6019	14	no	C_SrP	TMEM65,TRMT12,RNF139,TATDN1,NDUFB9,
13	25000000	25200000	17.8778	14	no	C_SrP	NA
13	17400000	17600000	18.1748	8	no	C_SrP	EXT1,
14	45200000	45400000	18.1904	6	no	C_SrP	BBS9,
18	7400000	7600000	18.3824	7	no	C_SrP	NA
13	23200000	23400000	18.6221	15	no	C_SrP	TRIB1,
13	17800000	18000000	18.9025	11	no	C_SrP	SAMD12,
13	25600000	25800000	18.9682	9	no	C_SrP	NA
6	61200000	61400000	19.2005	18	no	C_SrP	HS2ST1,
13	25400000	25600000	19.2671	11	no	C_SrP	NA
13	20000000	20200000	19.4675	10	no	C_SrP	NA
22	33800000	34000000	19.4845	8	no	C_SrP	NA
16	23200000	23400000	19.8029	10	no	C_SrP	SLC20A2,VDAC3,DKK4,POLB,IKBKB,
13	23000000	23200000	19.8357	11	no	C_SrP	SQLE,WASHC5,
13	24600000	24800000	20.3944	16	no	C_SrP	NA
13	23800000	24000000	20.8339	12	no	C_SrP	NA
10	7800000	8000000	20.8751	9	no	C_SrP	LEMD3,MSRB3,
15	2200000	2400000	20.9144	6	no	C_SrP	KCNQ4,NFYC,RIMS3,
13	20800000	21000000	21.0423	17	no	C_SrP	NA
13	21800000	22000000	22.1467	16	no	C_SrP	FBXO32,ENSCAFG00000001011,KLHL38,ANXA13,
3	15400000	15600000	22.2375	9	no	C_SrP	FAM172A,
13	22800000	23000000	22.3127	13	no	C_SrP	ZNF572,SQLE,
13	20200000	20400000	22.557	11	no	C_SrP	HAS2,
3	15200000	15400000	25.5546	11	no	C_SrP	KIAA0825,FAM172A,
18	200000	400000	26.1165	12	no	C_SrP	ABCA13,
13	23400000	23600000	27.3522	11	no	C_SrP	ENSCAFG00000030361,ENSCAFG00000001080,
6	38000000	38200000	29.0267	9	no	C_SrP	ZNF200,ENSCAFG00000030711,ZNF205,ZSCAN10,MMP25,BICDL2,THOC6,HCFC1R1,TNFRSF12A,CLDN6,CLDN9,ENSCAFG00000023132,
13	21000000	21200000	29.1971	16	no	C_SrP	NA
18	34800000	35000000	29.6348	7	no	C_SrP	CCDC73,EIF3M,
6	37800000	38000000	35.8618	10	no	C_SrP	ZNF597,ZNF174,OR2C1,ZNF75A,TIGD7,ZNF263,MEFV,ZNF200,
6	37600000	37800000	46.8964	6	no	C_SrP	SLX4,NLRC3,CLUAP1,C16orf90,NAA60,ZNF597,
2	32200000	32400000	17.6596	17	no	C_SXX	PITRM1,PFKP,
29	10400000	10600000	17.7577	9	no	C_SXX	NA
25	8600000	8800000	17.7812	8	no	C_SXX	NA
24	32200000	32400000	17.7841	12	no	C_SXX	RIMS4,YWHAB,PABPC1L,TOMM34,STK4,
12	55000000	55200000	18.017	10	no	C_SXX	UFL1,FHL5,
28	1600000	1800000	18.0248	12	no	C_SXX	OGDHL,PARG,TIMM23B,
24	32000000	32200000	18.053	13	no	C_SXX	ENSCAFG00000009480,ADA,WISP2,KCNK15,ENSCAFG00000031498,
28	1000000	1200000	18.1048	14	no	C_SXX	VSTM4,C10orf128,ENSCAFG00000006614,
31	21800000	22000000	18.3387	8	no	C_SXX	CYYR1,
12	63600000	63800000	18.3471	11	no	C_SXX	ATG5,
15	42000000	42200000	18.4584	12	no	C_SXX	STAB2,
26	0	200000	18.4686	14	no	C_SXX	ANHX,ZNF268,ZNF10,ZNF140,ENSCAFG00000024332,ZNF26,
1	93000000	93200000	18.5787	13	no	C_SXX	SPATA6L,PLPP6,CDC37L1,AK3,SNRPE,RCL1,
2	72200000	72400000	18.7385	11	no	C_SXX	DNAJC8,PTAFR,EYA3,
6	1400000	1600000	18.9684	11	no	C_SXX	ENSCAFG00000010867,CALN1,
26	800000	1000000	19.4035	9	no	C_SXX	NOC4L,DDX51,EP400,PUS1,ULK1,
15	30200000	30400000	19.44	11	no	C_SXX	DUSP6,ENSCAFG00000032174,POC1B,
25	4800000	5000000	19.5355	15	no	C_SXX	NBEA,
26	3000000	3200000	19.5706	11	no	C_SXX	TMEM132C,
25	4400000	4600000	19.7083	12	no	C_SXX	DCLK1,
15	33600000	33800000	19.7435	6	no	C_SXX	ENSCAFG00000006166,NUDT4,ENSCAFG00000006177,ENSCAFG00000030257,SOCS2,
24	33200000	33400000	20.0942	13	no	C_SXX	PLTP,PCIF1,ZNF335,MMP9,SLC12A5,NCOA5,CD40,
25	6200000	6400000	20.2763	6	no	C_SXX	NA
24	8200000	8400000	20.8657	10	no	C_SXX	FLRT3,
3	25600000	25800000	20.9616	8	no	C_SXX	SSBP2,
10	12800000	13000000	21.3443	7	no	C_SXX	TSPAN8,
28	2400000	2600000	21.5126	10	no	C_SXX	ZNF22,RASSF4,C10orf10,TMEM72,
28	1200000	1400000	21.5376	8	no	C_SXX	ENSCAFG00000029397,C10orf71,DRGX,ERCC6,
28	800000	1000000	21.6264	15	no	C_SXX	WDFY4,LRRC18,VSTM4,
1	99200000	99400000	21.7862	11	no	C_SXX	MFSD14B,CENPBD1,MZF1,
12	29200000	29400000	22.0483	6	no	C_SXX	NA
28	1400000	1600000	22.2654	11	no	C_SXX	ERCC6,ENSCAFG00000030265,SLC18A3,CHAT,C28H10orf53,OGDHL,
11	25800000	26000000	22.3112	10	no	C_SXX	BRD8,KIF20A,CDC23,GFRA3,CDC25C,SLBP2,FAM53C,KDM3B,
29	6800000	7000000	22.6177	7	no	C_SXX	XKR4,
1	98600000	98800000	22.9189	11	no	C_SXX	SUSD3,FGD3,BICD2,IPPK,
1	93200000	93400000	23.1963	6	no	C_SXX	RCL1,JAK2,
9	21200000	21400000	23.3183	9	no	C_SXX	KRT9,KRT19,KRT15,KRT13,KRT36,KRT35,KRT32,KRT38,KRT41,KRT34,
9	0	200000	23.4201	9	no	C_SXX	CD7,CSNK1D,SLC16A3,RFNG,CCDC57,
1	83400000	83600000	23.5787	12	no	C_SXX	TRPM6,RORB,
1	82600000	82800000	24.2627	10	no	C_SXX	NA
12	58600000	58800000	24.4315	9	no	C_SXX	ASCC3,
25	9000000	9200000	24.5198	13	no	C_SXX	HSPH1,TEX26,MEDAG,
3	37400000	37600000	24.6529	13	no	C_SXX	OTUD7A,
11	37000000	37200000	25.6702	6	no	C_SXX	RPL21,CNTLN,
30	22200000	22400000	25.962	11	no	C_SXX	TCF12,
28	8200000	8400000	26.443	16	no	C_SXX	PLCE1,
1	92600000	92800000	28.1769	9	no	C_SXX	GLIS3,
9	20600000	20800000	28.397	10	no	C_SXX	STAT3,STAT5A,STAT5B,GHDC,HCRT,KCNH4,RAB5C,HSPB9,KAT2A,DHX58,
1	98800000	99000000	37.7961	13	no	C_SXX	CENPP,ECM2,ASPN,OMD,OGN,
1	99000000	99200000	38.2089	7	no	C_SXX	CENPP,NOL8,IARS,ZNF585A,
1	6400000	6600000	12.0056	14	no	C_TMf	NA
15	7400000	7600000	12.0188	12	no	C_TMf	NA
20	20200000	20400000	12.0593	14	no	C_TMf	EIF4E3,
5	30400000	30600000	12.0988	7	no	C_TMf	UBE2G1,SPNS3,MYBBP1A,GGT6,ENSCAFG00000029828,SMTNL2,
28	14400000	14600000	12.0996	13	no	C_TMf	MGEA5,KCNIP2,C10orf76,ENSCAFG00000009988,
5	31800000	32000000	12.1354	13	no	C_TMf	ZMYND15,CXCL16,MED11,ARRB2,PELP1,RNASEK,ALOX15,
19	11000000	11200000	12.3037	7	no	C_TMf	NA
5	37200000	37400000	12.3459	18	no	C_TMf	HS3ST3A1,
15	39400000	39600000	12.4042	7	no	C_TMf	SCYL2,SLC17A8,NR1H4,ENSCAFG00000031488,
16	7400000	7600000	12.5178	14	no	C_TMf	TAS2R5,TAS2R3,SSBP1,WEE2,KIAA1147,AGK,
32	4800000	5000000	12.775	12	no	C_TMf	C4orf22,
9	800000	1000000	12.8793	9	no	C_TMf	SLC38A10,NDUFAF8,TEPSIN,CEP131,AATK,BAIAP2,CHMP6,
20	40800000	41000000	13.2361	6	no	C_TMf	CDC25A,ENSCAFG00000029616,MAP4,DHX30,
7	79400000	79600000	13.2508	12	no	C_TMf	DYM,
13	1400000	1600000	13.743	9	no	C_TMf	VPS13B,
27	23600000	23800000	14.0315	10	no	C_TMf	SOX5,
25	9600000	9800000	15.1487	14	no	C_TMf	KATNAL1,
9	600000	800000	15.2148	10	no	C_TMf	NPLOC4,FAAP100,FSCN2,ACTG1,BAHCC1,
5	27000000	27200000	15.6402	10	no	C_TMf	CASP4,CASP12,
2	2400000	2600000	15.738	11	no	C_TMf	PARD3,
9	400000	600000	15.7733	9	no	C_TMf	TSPAN10,PCYT2,ALYREF,ARHGDIA,P4HB,PPP1R27,MCRIP1,GCGR,ENSCAFG00000005812,HGS,ARL16,CCDC137,OXLD1,PDE6G,NPLOC4,ENSCAFG00000030278,
10	48600000	48800000	15.8131	13	no	C_TMf	EPAS1,TMEM247,ATP6V1E2,ENSCAFG00000002631,
14	37400000	37600000	15.8183	11	no	C_TMf	STK31,ENSCAFG00000029342,
21	28000000	28200000	15.849	8	no	C_TMf	cOR52A12,ENSCAFG00000032056,OR52A1,cOR51X4,OR51J1,ENSCAFG00000030672,OR51V1,ENSCAFG00000031701,ENSCAFG00000029518,ENSCAFG00000029568,ENSCAFG00000030286,ENSCAFG00000024181,
22	23000000	23200000	15.8631	10	no	C_TMf	NA
5	36000000	36200000	15.9231	9	yes	C_TMf	DNAH9,ZNF18,ENSCAFG00000017848,MAP2K4,
16	3800000	4000000	16.369	15	no	C_TMf	NA
15	33400000	33600000	16.3847	12	no	C_TMf	NA
20	6000000	6200000	16.3975	11	no	C_TMf	MKRN2,MKRN2OS,TSEN2,PPARG,
5	32000000	32200000	16.4547	8	no	C_TMf	RNASEK,ALOX12,C5H17orf49,BCL6B,SLC16A13,SLC16A11,ENSCAFG00000023018,ENSCAFG00000015995,ACADVL,DVL2,PHF23,
15	7200000	7400000	16.7988	9	no	C_TMf	NA
8	27800000	28000000	17.0102	7	no	C_TMf	FRMD6,
15	1000000	1200000	17.3884	6	no	C_TMf	FOXJ3,GUCA2A,GUCA2B,
34	0	200000	17.4914	7	no	C_TMf	ENSCAFG00000008984,OTULIN,
3	15400000	15600000	17.5508	9	no	C_TMf	FAM172A,
5	35800000	36000000	18.7775	12	yes	C_TMf	DNAH9,
8	200000	400000	18.9465	9	no	C_TMf	NLRP3,ENSCAFG00000010708,OR2B11,
1	24400000	24600000	19.0725	8	no	C_TMf	MC5R,RNMT,ENSCAFG00000029562,ENSCAFG00000029833,FAM210A,LDLRAD4,ENSCAFG00000023012,
8	800000	1000000	19.0791	9	no	C_TMf	CATSPERB,
15	39800000	40000000	19.3344	12	no	C_TMf	ANO4,
10	8000000	8200000	19.7025	11	no	C_TMf	MSRB3,
24	23400000	23600000	19.8326	14	no	C_TMf	AHCY,ENSCAFG00000007508,ITCH,
15	40800000	41000000	20.0853	7	no	C_TMf	CCDC53,NUP37,PARPBP,
34	200000	400000	20.2301	16	no	C_TMf	FAM105A,TRIO,
3	15200000	15400000	20.2359	11	no	C_TMf	KIAA0825,FAM172A,
10	7800000	8000000	20.3075	9	no	C_TMf	LEMD3,MSRB3,
29	16600000	16800000	20.5069	9	no	C_TMf	CSPP1,ARFGEF1,
8	1000000	1200000	21.3772	6	no	C_TMf	CATSPERB,TC2N,FBLN5,
18	3800000	4000000	22.1887	6	no	C_TMf	NA
4	34200000	34400000	23.6115	7	no	C_TMf	WAPL,OPN4,LDB3,
6	62000000	62200000	10.8015	7	no	C_XSH	COL24A1,
1	93600000	93800000	10.8413	7	no	C_XSH	CD274,PDCD1LG2,RIC1,
28	200000	400000	10.8553	14	no	C_XSH	ENSCAFG00000028974,MAPK8,
15	27000000	27200000	10.9358	14	no	C_XSH	NA
1	44200000	44400000	10.9528	12	no	C_XSH	IPCEF1,
29	10400000	10600000	11.0023	9	no	C_XSH	NA
15	44000000	44200000	11.094	9	no	C_XSH	SMAD1,
5	46400000	46600000	11.1343	14	no	C_XSH	PGM1,EFCAB7,
1	23800000	24000000	11.1503	12	no	C_XSH	MEX3C,SMAD4,ELAC1,ME2,
21	4400000	4600000	11.1522	14	no	C_XSH	NA
24	17600000	17800000	11.4236	18	no	C_XSH	ADAM33,SIGLEC1,HSPA12B,ENSCAFG00000030551,GFRA4,ATRN,
6	25800000	26000000	11.4944	13	no	C_XSH	TMC5,TMC7,COQ7,ITPRIPL2,
4	74600000	74800000	11.5259	7	no	C_XSH	NPR3,
31	25400000	25600000	11.5329	8	no	C_XSH	ENSCAFG00000031889,ENSCAFG00000030223,
2	46400000	46600000	11.6519	8	no	C_XSH	NA
9	1000000	1200000	11.7167	8	no	C_XSH	CHMP6,RPTOR,
21	23800000	24000000	11.9239	14	no	C_XSH	POLD3,LIPT2,KCNE3,PGM2L1,P4HA3,
20	38800000	39000000	12.2086	10	no	C_XSH	C3orf18,CACNA2D2,TMEM115,
12	13200000	13400000	12.7333	13	no	C_XSH	SUPT3H,
2	53800000	54000000	12.7595	8	no	C_XSH	NA
15	40800000	41000000	12.8975	7	no	C_XSH	CCDC53,NUP37,PARPBP,
5	62400000	62600000	12.9024	12	yes	C_XSH	SLC2A5,GPR157,H6PD,
1	4400000	4600000	12.9231	10	no	C_XSH	ZNF407,
13	1600000	1800000	13.1093	10	no	C_XSH	VPS13B,
20	30200000	30400000	13.221	7	no	C_XSH	NA
6	52000000	52200000	13.4767	6	no	C_XSH	DPYD,
5	63600000	63800000	13.5947	12	no	C_XSH	GAS8,DBNDD1,DEF8,TUBB3,TCF25,SPIRE2,FANCA,ENSCAFG00000028840,
6	60800000	61000000	13.9193	7	no	C_XSH	LMO4,
18	16000000	16200000	14.0835	11	no	C_XSH	ORC5,
6	7400000	7600000	14.1868	10	no	C_XSH	MDH2,SRRM3,HSPB1,YWHAG,SSC4D,ZP3,
1	4600000	4800000	14.2078	9	no	C_XSH	ZNF407,
10	4800000	5000000	14.5148	9	no	C_XSH	NA
20	5600000	5800000	14.5708	10	no	C_XSH	PLXND1,ENSCAFG00000004631,RHO,IFT122,MBD4,RPL32,CAND2,
2	6800000	7000000	14.8604	12	no	C_XSH	YME1L1,MASTL,ACBD5,ABI1,
13	1400000	1600000	15.0617	9	no	C_XSH	VPS13B,
13	6600000	6800000	15.0656	16	no	C_XSH	ZFPM2,
11	47000000	47200000	15.1166	8	no	C_XSH	NA
13	8000000	8200000	15.3978	11	yes	C_XSH	ANGPT1,
13	8400000	8600000	19.3115	11	no	C_XSH	NA
10	7800000	8000000	20.1699	9	no	C_XSH	LEMD3,MSRB3,
10	8000000	8200000	21.3398	11	yes	C_XSH	MSRB3,
6	61200000	61400000	22.4204	18	no	C_XSH	HS2ST1,
9	800000	1000000	22.5667	9	no	C_XSH	SLC38A10,NDUFAF8,TEPSIN,CEP131,AATK,BAIAP2,CHMP6,
6	61000000	61200000	23.3543	11	no	C_XSH	HS2ST1,
6	61600000	61800000	24.6924	6	no	C_XSH	CLCA1,CLCA2,ODF2L,
9	400000	600000	25.1503	9	no	C_XSH	TSPAN10,PCYT2,ALYREF,ARHGDIA,P4HB,PPP1R27,MCRIP1,GCGR,ENSCAFG00000005812,HGS,ARL16,CCDC137,OXLD1,PDE6G,NPLOC4,ENSCAFG00000030278,
9	600000	800000	27.3836	10	no	C_XSH	NPLOC4,FAAP100,FSCN2,ACTG1,BAHCC1,
21	4200000	4400000	29.1141	8	no	C_XSH	NA
13	8600000	8800000	34.4392	13	no	C_XSH	RSPO2,
13	8200000	8400000	44.3901	11	no	C_XSH	ANGPT1,
