# Supplementary material for: Genetic Diversity and Signatures of Selection in 15 Chinese Indigenous Dog Breeds Revealed by Genome-Wide SNPs
Source: Front Genet. 2019 Nov 15;10:1174. doi: 10.3389/fgene.2019.01174 (PMC6872681; doi:10.3389/fgene.2019.01174)
Supplement: Table S5 — Annotation of SNPs showing signatures of selection in three specific dog groups. [file Table_5.xlsx]

## Sheet: Table S5
Table S5. SNPs showing signatures of selection in three specific dog groups.
Groups	Chromosome	Position	REF_Allele	ALT_Allele	MAF	Di	SNP location	Gene name
Tibetan Plateau dogs	1	93407721	G	A	0.3412	16.2682	intron_variant	JAK2
Tibetan Plateau dogs	1	93410169	A	G	0.2754	16.2682	intron_variant	JAK2
Tibetan Plateau dogs	1	93459019	A	C	0.3441	16.2682	downstream_gene_variant	INSL6
Tibetan Plateau dogs	1	93509044	G	A	0.2324	16.2682	intron_variant	CD274
Tibetan Plateau dogs	1	93535420	C	A	0.25	16.2682	intron_variant	PLGRKT
Tibetan Plateau dogs	1	93561590	C	A	0.2324	16.2682	intron_variant	PLGRKT
Tibetan Plateau dogs	1	93580346	A	C	0.4324	16.2682	upstream_gene_variant	PLGRKT
Tibetan Plateau dogs	2	11405709	G	A	0.4912	13.2884	intron_variant	MLLT10
Tibetan Plateau dogs	2	11450075	A	G	0.2088	13.2884	intron_variant	MLLT10
Tibetan Plateau dogs	2	11463663	A	G	0.2882	13.2884	intron_variant	MLLT10
Tibetan Plateau dogs	2	11484979	G	A	0.2029	13.2884	intron_variant	MLLT10
Tibetan Plateau dogs	2	11491219	G	A	0.2882	13.2884	intron_variant	MLLT10
Tibetan Plateau dogs	2	11508774	A	G	0.2029	13.2884	intron_variant	MLLT10
Tibetan Plateau dogs	2	11537148	G	A	0.1441	13.2884	intron_variant	MLLT10
Tibetan Plateau dogs	2	11575101	G	A	0.2882	13.2884	intron_variant	MLLT10
Tibetan Plateau dogs	2	34405461	A	G	0.1235	14.1645	intron_variant	DIP2C
Tibetan Plateau dogs	2	34411161	G	A	0.4912	14.1645	intron_variant	DIP2C
Tibetan Plateau dogs	2	34422909	A	G	0.3912	14.1645	intron_variant	DIP2C
Tibetan Plateau dogs	2	34453423	A	G	0.4912	14.1645	intron_variant	DIP2C
Tibetan Plateau dogs	2	34460620	A	G	0.4029	14.1645	intron_variant	DIP2C
Tibetan Plateau dogs	2	34504797	A	G	0.4912	14.1645	intron_variant	ZMYND11
Tibetan Plateau dogs	2	34532098	G	A	0.3324	14.1645	intron_variant	ZMYND11
Tibetan Plateau dogs	2	34568835	A	G	0.1441	14.1645	intron_variant	ZMYND11
Tibetan Plateau dogs	3	52875229	A	G	0.4235	18.2673	intron_variant	ARPIN
Tibetan Plateau dogs	3	52895114	A	G	0.2235	18.2673	intergenic_variant
Tibetan Plateau dogs	3	52912041	G	A	0.2912	18.2673	intergenic_variant
Tibetan Plateau dogs	3	52926554	A	G	0.2912	18.2673	intergenic_variant
Tibetan Plateau dogs	3	52959582	G	A	0.3441	18.2673	intergenic_variant
Tibetan Plateau dogs	3	52960451	A	G	0.4882	18.2673	intergenic_variant
Tibetan Plateau dogs	3	52989743	C	A	0.3206	18.2673	intergenic_variant
Tibetan Plateau dogs	3	56412902	A	G	0.4529	13.3677	upstream_gene_variant	TMC3
Tibetan Plateau dogs	3	56424626	A	G	0.08529	13.3677	intron_variant	TMC3
Tibetan Plateau dogs	3	56447386	A	G	0.2353	13.3677	intron_variant	TMC3
Tibetan Plateau dogs	3	56452318	A	C	0.2735	13.3677	intron_variant	TMC3
Tibetan Plateau dogs	3	56515835	A	G	0.3265	13.3677	intron_variant	IL16
Tibetan Plateau dogs	3	56527302	A	C	0.08235	13.3677	intron_variant	IL16
Tibetan Plateau dogs	3	56546838	A	G	0.1647	13.3677	intron_variant	IL16
Tibetan Plateau dogs	3	56565575	A	G	0.2235	13.3677	intron_variant	IL16
Tibetan Plateau dogs	3	56573074	A	G	0.07059	13.3677	intron_variant	IL16
Tibetan Plateau dogs	3	56592651	G	A	0.3029	13.3677	intergenic_variant
Tibetan Plateau dogs	3	56810038	A	C	0.4852	14.6376	intergenic_variant
Tibetan Plateau dogs	3	56817520	A	G	0.3765	14.6376	intergenic_variant
Tibetan Plateau dogs	3	56836101	A	G	0.1176	14.6376	intergenic_variant
Tibetan Plateau dogs	3	56899625	G	A	0.2676	14.6376	intergenic_variant
Tibetan Plateau dogs	3	56941022	A	G	0.4467	14.6376	intergenic_variant
Tibetan Plateau dogs	3	56960185	A	C	0.2853	14.6376	intergenic_variant
Tibetan Plateau dogs	3	56981666	G	A	0.1029	14.6376	intergenic_variant
Tibetan Plateau dogs	3	56983930	A	G	0.2882	14.6376	intergenic_variant
Tibetan Plateau dogs	3	56994990	C	A	0.08824	14.6376	intergenic_variant
Tibetan Plateau dogs	4	34225911	A	G	0.2206	15.8908	intron_variant	WAPL
Tibetan Plateau dogs	4	34238203	A	G	0.3412	15.8908	intron_variant	WAPL
Tibetan Plateau dogs	4	34243987	C	A	0.4912	15.8908	intron_variant	WAPL
Tibetan Plateau dogs	4	34281523	A	G	0.2176	15.8908	intron_variant	WAPL
Tibetan Plateau dogs	4	34299711	A	C	0.1588	15.8908	intron_variant	WAPL
Tibetan Plateau dogs	4	34326613	A	G	0.4147	15.8908	intron_variant	WAPL
Tibetan Plateau dogs	4	34332981	A	G	0.4118	15.8908	intron_variant	WAPL
Tibetan Plateau dogs	5	32002171	C	A	0.3559	13.9479	intron_variant	RNASEK
Tibetan Plateau dogs	5	32014424	G	A	0.3529	13.9479	intron_variant	RNASEK
Tibetan Plateau dogs	5	32022359	A	G	0.35	13.9479	upstream_gene_variant	ALOX12
Tibetan Plateau dogs	5	32033108	G	A	0.35	13.9479	intron_variant	ALOX12
Tibetan Plateau dogs	5	32111827	A	C	0.3	13.9479	downstream_gene_variant	ASGR2
Tibetan Plateau dogs	5	32114178	G	A	0.3382	13.9479	intron_variant	ASGR2
Tibetan Plateau dogs	5	32158985	A	G	0.2971	13.9479	intergenic_variant
Tibetan Plateau dogs	5	32174924	C	A	0.3059	13.9479	intron_variant	DLG4
Tibetan Plateau dogs	5	35807352	A	G	0.06176	18.7469	intron_variant	DNAH9
Tibetan Plateau dogs	5	35827698	G	A	0.2588	18.7469	intron_variant	DNAH9
Tibetan Plateau dogs	5	35841797	A	G	0.2882	18.7469	intron_variant	DNAH9
Tibetan Plateau dogs	5	35846482	G	A	0.2853	18.7469	intron_variant	DNAH9
Tibetan Plateau dogs	5	35863769	G	A	0.2912	18.7469	intron_variant	DNAH9
Tibetan Plateau dogs	5	35879063	A	G	0.3647	18.7469	intron_variant	DNAH9
Tibetan Plateau dogs	5	35891215	A	G	0.3088	18.7469	intron_variant	DNAH9
Tibetan Plateau dogs	5	35904170	C	A	0.4912	18.7469	intron_variant	DNAH9
Tibetan Plateau dogs	5	35922402	A	G	0.3706	18.7469	intron_variant	DNAH9
Tibetan Plateau dogs	5	35924426	G	A	0.3706	18.7469	intron_variant	DNAH9
Tibetan Plateau dogs	5	35987958	A	C	0.07988	18.7469	intron_variant	DNAH9
Tibetan Plateau dogs	5	35997299	G	A	0.3618	18.7469	intron_variant	DNAH9
Tibetan Plateau dogs	5	37803648	A	G	0.2471	17.9384	intergenic_variant
Tibetan Plateau dogs	5	37821541	A	C	0.4294	17.9384	intergenic_variant
Tibetan Plateau dogs	5	37827505	G	A	0.3059	17.9384	intergenic_variant
Tibetan Plateau dogs	5	37894923	C	A	0.2206	17.9384	intron_variant	COX10
Tibetan Plateau dogs	5	37906090	A	G	0.4441	17.9384	intron_variant	COX10
Tibetan Plateau dogs	5	37920160	C	A	0.4408	17.9384	intron_variant	COX10
Tibetan Plateau dogs	5	37935340	C	A	0.4	17.9384	intron_variant	COX10
Tibetan Plateau dogs	6	12004734	A	G	0.4118	14.2673	upstream_gene_variant	ENSCAFG00000023499
Tibetan Plateau dogs	6	12010792	G	A	0.2059	14.2673	intron_variant	ENSCAFG00000023499
Tibetan Plateau dogs	6	12028183	A	G	0.2	14.2673	downstream_gene_variant	ENSCAFG00000023499
Tibetan Plateau dogs	6	12161234	A	G	0.2735	14.2673	intergenic_variant
Tibetan Plateau dogs	6	12171529	G	A	0.1676	14.2673	intergenic_variant
Tibetan Plateau dogs	6	40035536	G	A	0.1735	15.1125	intron_variant	RAB11FIP3
Tibetan Plateau dogs	6	40068693	A	C	0.1824	15.1125	intergenic_variant
Tibetan Plateau dogs	6	40118698	A	G	0.3529	15.1125	upstream_gene_variant	DECR2
Tibetan Plateau dogs	6	40143309	A	G	0.2559	15.1125	missense_variant	TMEM8A
Tibetan Plateau dogs	6	40186396	A	G	0.2676	15.1125	intron_variant	AXIN1
Tibetan Plateau dogs	6	45204761	A	C	0.4324	14.1348	intergenic_variant
Tibetan Plateau dogs	6	45216526	A	G	0.2382	14.1348	intergenic_variant
Tibetan Plateau dogs	6	45229808	A	G	0.4794	14.1348	intergenic_variant
Tibetan Plateau dogs	6	45239528	A	G	0.2412	14.1348	intergenic_variant
Tibetan Plateau dogs	6	45250385	G	A	0.4029	14.1348	intergenic_variant
Tibetan Plateau dogs	6	45261594	A	G	0.2963	14.1348	intergenic_variant
Tibetan Plateau dogs	6	45281123	A	G	0.1971	14.1348	downstream_gene_variant	RF00001
Tibetan Plateau dogs	6	45363876	G	A	0.2917	14.1348	intergenic_variant
Tibetan Plateau dogs	6	72017507	G	A	0.4147	13.3761	intron_variant	TNNI3K
Tibetan Plateau dogs	6	72025470	G	A	0.4471	13.3761	intron_variant	TNNI3K
Tibetan Plateau dogs	6	72045673	G	A	0.4029	13.3761	intron_variant	TNNI3K
Tibetan Plateau dogs	6	72064972	G	A	0.3118	13.3761	intron_variant	TNNI3K
Tibetan Plateau dogs	6	72073747	G	A	0.3235	13.3761	intron_variant	TNNI3K
Tibetan Plateau dogs	6	72081731	G	A	0.2647	13.3761	intron_variant	TNNI3K
Tibetan Plateau dogs	6	72091081	A	G	0.3618	13.3761	intron_variant	TNNI3K
Tibetan Plateau dogs	6	72103541	C	A	0.2824	13.3761	intron_variant	TNNI3K
Tibetan Plateau dogs	6	72113247	G	A	0.3077	13.3761	intergenic_variant
Tibetan Plateau dogs	6	72137968	A	C	0.1863	13.3761	upstream_gene_variant	LRRIQ3
Tibetan Plateau dogs	7	6204471	A	G	0.2059	13.1781	intron_variant	PFKFB2
Tibetan Plateau dogs	7	6217391	A	G	0.1765	13.1781	intron_variant	PFKFB2
Tibetan Plateau dogs	7	6217465	G	A	0.2265	13.1781	intron_variant	PFKFB2
Tibetan Plateau dogs	7	6221985	C	A	0.4382	13.1781	downstream_gene_variant	PFKFB2
Tibetan Plateau dogs	7	6234790	G	A	0.5	13.1781	intron_variant	C4BPB
Tibetan Plateau dogs	7	6257345	A	C	0.2382	13.1781	intron_variant	C4BPA
Tibetan Plateau dogs	7	6289416	A	G	0.45	13.1781	intergenic_variant
Tibetan Plateau dogs	7	6296831	A	G	0.4559	13.1781	intergenic_variant
Tibetan Plateau dogs	7	6309725	G	A	0.2324	13.1781	downstream_gene_variant	ENSCAFG00000029002
Tibetan Plateau dogs	7	6327050	A	G	0.1941	13.1781	intergenic_variant
Tibetan Plateau dogs	7	6349989	G	A	0.3853	13.1781	intergenic_variant
Tibetan Plateau dogs	7	6374084	G	A	0.3559	13.1781	intron_variant	CD55
Tibetan Plateau dogs	7	6395940	A	G	0.3765	13.1781	intergenic_variant
Tibetan Plateau dogs	7	40442086	G	A	0.09118	17.9664	intron_variant	CAPN8
Tibetan Plateau dogs	7	40449229	A	G	0.2118	17.9664	intron_variant	CAPN8
Tibetan Plateau dogs	7	40468937	A	G	0.3235	17.9664	downstream_gene_variant	ENSCAFG00000039273
Tibetan Plateau dogs	7	40483859	G	A	0.4706	17.9664	intron_variant	ENSCAFG00000016445
Tibetan Plateau dogs	7	40494392	G	A	0.4375	17.9664	upstream_gene_variant	ENSCAFG00000016445
Tibetan Plateau dogs	7	40533080	G	A	0.2176	17.9664	upstream_gene_variant	FCRL1
Tibetan Plateau dogs	7	40539680	A	G	0.08824	17.9664	intron_variant	FCRL1
Tibetan Plateau dogs	7	40547812	C	A	0.4235	17.9664	intron_variant	FCRL1
Tibetan Plateau dogs	7	40568190	A	C	0.2971	17.9664	intron_variant	FCRL2
Tibetan Plateau dogs	7	40584001	C	A	0.4824	17.9664	intron_variant	FCRL1
Tibetan Plateau dogs	8	1016828	A	G	0.1	13.7195	intron_variant	CATSPERB
Tibetan Plateau dogs	8	1058070	G	A	0.3706	13.7195	intron_variant	CATSPERB
Tibetan Plateau dogs	8	1101779	G	A	0.1941	13.7195	intron_variant	TC2N
Tibetan Plateau dogs	8	1135641	A	G	0.3765	13.7195	intergenic_variant
Tibetan Plateau dogs	8	1158202	A	G	0.3647	13.7195	downstream_gene_variant	FBLN5
Tibetan Plateau dogs	8	1193344	A	G	0.1176	13.7195	intron_variant	FBLN5
Tibetan Plateau dogs	8	52603920	A	C	0.3088	13.3091	intergenic_variant
Tibetan Plateau dogs	8	52627317	A	G	0.4353	13.3091	intergenic_variant
Tibetan Plateau dogs	8	52634464	A	G	0.2824	13.3091	intergenic_variant
Tibetan Plateau dogs	8	52668247	A	G	0.2176	13.3091	intergenic_variant
Tibetan Plateau dogs	8	52676120	G	A	0.07647	13.3091	intergenic_variant
Tibetan Plateau dogs	8	52708439	G	A	0.3174	13.3091	intergenic_variant
Tibetan Plateau dogs	8	52726054	A	C	0.4265	13.3091	intergenic_variant
Tibetan Plateau dogs	8	52726994	A	G	0.4412	13.3091	intergenic_variant
Tibetan Plateau dogs	8	52755087	G	A	0.1706	13.3091	intergenic_variant
Tibetan Plateau dogs	8	52763337	C	A	0.4206	13.3091	intergenic_variant
Tibetan Plateau dogs	9	425505	A	G	0.2412	14.5354	intron_variant	TSPAN10
Tibetan Plateau dogs	9	430021	A	G	0.2471	14.5354	intron_variant	TSPAN10
Tibetan Plateau dogs	9	445222	A	G	0.2471	14.5354	intron_variant	TSPAN10
Tibetan Plateau dogs	9	497026	A	G	0.1971	14.5354	intron_variant	TSPAN10
Tibetan Plateau dogs	9	508228	G	A	0.3706	14.5354	intron_variant	TSPAN10
Tibetan Plateau dogs	9	527317	A	G	0.3647	14.5354	intron_variant	TSPAN10
Tibetan Plateau dogs	9	571277	A	G	0.4382	14.5354	intron_variant	NPLOC4
Tibetan Plateau dogs	9	583067	A	G	0.3647	14.5354	intron_variant	NPLOC4
Tibetan Plateau dogs	9	598298	A	G	0.3647	14.5354	intron_variant	NPLOC4
Tibetan Plateau dogs	10	7818412	A	G	0.2971	15.6183	intron_variant	LEMD3
Tibetan Plateau dogs	10	7849854	G	A	0.4734	15.6183	intron_variant&non_coding_transcript_variant	ENSCAFG00000040193
Tibetan Plateau dogs	10	7858417	A	G	0.2294	15.6183	upstream_gene_variant	ENSCAFG00000040193
Tibetan Plateau dogs	10	7873071	G	A	0.2176	15.6183	intergenic_variant
Tibetan Plateau dogs	10	7892540	C	A	0.4353	15.6183	upstream_gene_variant	MSRB3
Tibetan Plateau dogs	10	7957984	G	A	0.4294	15.6183	intron_variant	MSRB3
Tibetan Plateau dogs	10	7961932	T	A	0.06509	15.6183	intron_variant	MSRB3
Tibetan Plateau dogs	10	7993147	G	A	0.45	15.6183	intron_variant	MSRB3
Tibetan Plateau dogs	10	7996770	A	G	0.45	15.6183	intron_variant	MSRB3
Tibetan Plateau dogs	10	8013736	G	A	0.4941	15.1009	intron_variant	MSRB3
Tibetan Plateau dogs	10	8019503	A	G	0.4971	15.1009	intron_variant	MSRB3
Tibetan Plateau dogs	10	8030670	A	G	0.3765	15.1009	intron_variant	MSRB3
Tibetan Plateau dogs	10	8059173	C	A	0.3882	15.1009	intergenic_variant
Tibetan Plateau dogs	10	8070103	A	G	0.3824	15.1009	intergenic_variant
Tibetan Plateau dogs	10	8085469	A	G	0.4941	15.1009	intergenic_variant
Tibetan Plateau dogs	10	8114328	A	G	0.06471	15.1009	intergenic_variant
Tibetan Plateau dogs	10	8127216	C	A	0.1265	15.1009	intergenic_variant
Tibetan Plateau dogs	10	8151076	A	G	0.1059	15.1009	intergenic_variant
Tibetan Plateau dogs	10	8162459	G	A	0.4529	15.1009	intergenic_variant
Tibetan Plateau dogs	10	8183593	A	G	0.2706	15.1009	intergenic_variant
Tibetan Plateau dogs	10	48605398	A	G	0.4382	13.2031	intron_variant	EPAS1
Tibetan Plateau dogs	10	48623734	A	G	0.1	13.2031	intron_variant	EPAS1
Tibetan Plateau dogs	10	48627421	G	A	0.4618	13.2031	intron_variant	EPAS1
Tibetan Plateau dogs	10	48641050	G	A	0.4941	13.2031	intergenic_variant
Tibetan Plateau dogs	10	48653898	A	G	0.2706	13.2031	intergenic_variant
Tibetan Plateau dogs	10	48671410	A	G	0.3735	13.2031	intergenic_variant
Tibetan Plateau dogs	10	48683754	A	G	0.1618	13.2031	intergenic_variant
Tibetan Plateau dogs	10	48706235	A	G	0.2059	13.2031	intergenic_variant
Tibetan Plateau dogs	10	48722629	G	A	0.3471	13.2031	downstream_gene_variant	TMEM247
Tibetan Plateau dogs	10	48731431	A	G	0.05588	13.2031	intergenic_variant
Tibetan Plateau dogs	10	48765164	G	A	0.3088	13.2031	upstream_gene_variant	RHOQ
Tibetan Plateau dogs	10	48775613	A	G	0.2735	13.2031	intron_variant	RHOQ
Tibetan Plateau dogs	10	48794551	A	G	0.1441	13.2031	intron_variant	RHOQ
Tibetan Plateau dogs	11	7827590	G	A	0.4324	17.2193	intergenic_variant
Tibetan Plateau dogs	11	7869629	A	C	0.3824	17.2193	intergenic_variant
Tibetan Plateau dogs	11	7932034	A	C	0.2355	17.2193	intergenic_variant
Tibetan Plateau dogs	11	7964675	A	G	0.4618	17.2193	intergenic_variant
Tibetan Plateau dogs	11	7974687	G	A	0.4559	17.2193	intergenic_variant
Tibetan Plateau dogs	11	7998934	G	A	0.1206	17.2193	intergenic_variant
Tibetan Plateau dogs	11	8407491	A	G	0.3824	18.035	intron_variant	ENSCAFG00000000175
Tibetan Plateau dogs	11	8439788	A	C	0.3088	18.035	intron_variant	DMXL1
Tibetan Plateau dogs	11	8448921	G	A	0.4088	18.035	intron_variant	DMXL1
Tibetan Plateau dogs	11	8569300	A	G	0.3735	18.035	intergenic_variant
Tibetan Plateau dogs	11	8578208	G	A	0.2265	18.035	intergenic_variant
Tibetan Plateau dogs	11	51889766	A	G	0.4059	14.111	intron_variant	UNC13B
Tibetan Plateau dogs	11	51926488	G	A	0.1627	14.111	intron_variant	UNC13B
Tibetan Plateau dogs	11	51936976	A	C	0.1588	14.111	intron_variant	UNC13B
Tibetan Plateau dogs	11	51950211	G	A	0.3853	14.111	intron_variant&non_coding_transcript_variant	ENSCAFG00000034198
Tibetan Plateau dogs	11	51997328	A	C	0.3618	14.111	upstream_gene_variant	ENSCAFG00000002045
Tibetan Plateau dogs	12	7048978	G	A	0.4941	12.9815	intron_variant	ZFAND3
Tibetan Plateau dogs	12	7060899	A	G	0.2765	12.9815	intron_variant	ZFAND3
Tibetan Plateau dogs	12	7065759	C	A	0.09226	12.9815	intron_variant	ZFAND3
Tibetan Plateau dogs	12	7094185	A	G	0.4765	12.9815	intron_variant	ZFAND3
Tibetan Plateau dogs	12	7151423	C	A	0.4206	12.9815	intergenic_variant
Tibetan Plateau dogs	12	7155176	G	A	0.2941	12.9815	intergenic_variant
Tibetan Plateau dogs	12	7176344	G	A	0.3382	12.9815	intergenic_variant
Tibetan Plateau dogs	12	7182240	A	G	0.07941	12.9815	intergenic_variant
Tibetan Plateau dogs	12	43410057	G	A	0.3794	20.1249	intron_variant	UBE3D
Tibetan Plateau dogs	12	43412816	A	G	0.3294	20.1249	intron_variant	UBE3D
Tibetan Plateau dogs	12	43449346	A	G	0.4324	20.1249	intron_variant	UBE3D
Tibetan Plateau dogs	12	43461463	A	G	0.2794	20.1249	intron_variant	UBE3D
Tibetan Plateau dogs	12	43492280	G	A	0.3294	20.1249	intergenic_variant
Tibetan Plateau dogs	12	43493093	G	A	0.3706	20.1249	intergenic_variant
Tibetan Plateau dogs	12	43511409	A	C	0.2382	20.1249	upstream_gene_variant	DOP1A
Tibetan Plateau dogs	12	43519813	G	A	0.2794	20.1249	intron_variant	DOP1A
Tibetan Plateau dogs	12	43534378	G	A	0.1618	20.1249	intron_variant	DOP1A
Tibetan Plateau dogs	12	43545803	G	A	0.2824	20.1249	intron_variant	DOP1A
Tibetan Plateau dogs	12	43560569	A	C	0.3735	20.1249	intron_variant	DOP1A
Tibetan Plateau dogs	12	43567777	A	G	0.2294	20.1249	intron_variant	DOP1A
Tibetan Plateau dogs	12	43583226	A	G	0.06765	20.1249	intron_variant	DOP1A
Tibetan Plateau dogs	12	43608199	A	C	0.4706	31.9805	intron_variant	PGM3
Tibetan Plateau dogs	12	43627368	A	C	0.1235	31.9805	intron_variant	ME1
Tibetan Plateau dogs	12	43636053	G	A	0.1341	31.9805	intron_variant	ME1
Tibetan Plateau dogs	12	43649400	A	G	0.1235	31.9805	intron_variant	ME1
Tibetan Plateau dogs	12	43680049	A	G	0.2265	31.9805	intron_variant	ME1
Tibetan Plateau dogs	12	43705823	A	G	0.1206	31.9805	intron_variant	ME1
Tibetan Plateau dogs	12	43748075	C	A	0.2324	31.9805	intron_variant	ME1
Tibetan Plateau dogs	12	43771918	G	A	0.4559	31.9805	intron_variant	ME1
Tibetan Plateau dogs	12	43789146	G	A	0.1971	31.9805	intron_variant	ME1
Tibetan Plateau dogs	12	43792189	A	G	0.1176	31.9805	upstream_gene_variant	ME1
Tibetan Plateau dogs	12	44055817	G	A	0.1382	17.7043	intron_variant	SNAP91
Tibetan Plateau dogs	12	44060321	C	A	0.2176	17.7043	upstream_gene_variant	SNAP91
Tibetan Plateau dogs	12	44082196	C	A	0.4029	17.7043	intron_variant&non_coding_transcript_variant	ENSCAFG00000035407
Tibetan Plateau dogs	12	44108225	A	C	0.4912	17.7043	downstream_gene_variant	ENSCAFG00000034222
Tibetan Plateau dogs	12	44127831	A	G	0.09706	17.7043	intron_variant&non_coding_transcript_variant	ENSCAFG00000035407
Tibetan Plateau dogs	12	44162734	G	A	0.1441	17.7043	upstream_gene_variant	RIPPLY2
Tibetan Plateau dogs	12	51820458	A	G	0.2794	13.6954	intergenic_variant
Tibetan Plateau dogs	12	51851735	G	A	0.3882	13.6954	intergenic_variant
Tibetan Plateau dogs	12	51855605	A	C	0.264	13.6954	intergenic_variant
Tibetan Plateau dogs	12	51867684	A	G	0.3941	13.6954	intergenic_variant
Tibetan Plateau dogs	12	51888952	G	A	0.4441	13.6954	intergenic_variant
Tibetan Plateau dogs	12	51907560	G	A	0.1	13.6954	intergenic_variant
Tibetan Plateau dogs	12	51933549	G	A	0.1971	13.6954	intergenic_variant
Tibetan Plateau dogs	12	51970359	G	A	0.2618	13.6954	intergenic_variant
Tibetan Plateau dogs	12	51984161	C	A	0.4147	13.6954	intergenic_variant
Tibetan Plateau dogs	15	33406523	G	A	0.3588	14.9225	intron_variant&non_coding_transcript_variant	ENSCAFG00000034837
Tibetan Plateau dogs	15	33435106	A	C	0.3206	14.9225	intron_variant&non_coding_transcript_variant	ENSCAFG00000034837
Tibetan Plateau dogs	15	33447636	A	C	0.2559	14.9225	intron_variant&non_coding_transcript_variant	ENSCAFG00000034837
Tibetan Plateau dogs	15	33464912	A	G	0.3676	14.9225	intron_variant&non_coding_transcript_variant	ENSCAFG00000034837
Tibetan Plateau dogs	15	33469922	A	G	0.3794	14.9225	downstream_gene_variant	ENSCAFG00000034837
Tibetan Plateau dogs	15	33492234	A	G	0.07647	14.9225	intron_variant&non_coding_transcript_variant	ENSCAFG00000034837
Tibetan Plateau dogs	15	33531349	G	A	0.4853	14.9225	intron_variant&non_coding_transcript_variant	ENSCAFG00000034837
Tibetan Plateau dogs	15	33541484	C	A	0.4706	14.9225	intron_variant&non_coding_transcript_variant	ENSCAFG00000034837
Tibetan Plateau dogs	15	33556394	A	G	0.4706	14.9225	intron_variant&non_coding_transcript_variant	ENSCAFG00000034837
Tibetan Plateau dogs	15	33569229	A	G	0.4676	14.9225	intron_variant&non_coding_transcript_variant	ENSCAFG00000034837
Tibetan Plateau dogs	15	33574280	G	A	0.4706	14.9225	intron_variant&non_coding_transcript_variant	ENSCAFG00000034837
Tibetan Plateau dogs	15	33582636	A	G	0.4706	14.9225	intron_variant&non_coding_transcript_variant	ENSCAFG00000034837
Tibetan Plateau dogs	15	40805862	G	A	0.2147	19.1452	intergenic_variant
Tibetan Plateau dogs	15	40819601	A	G	0.4441	19.1452	intergenic_variant
Tibetan Plateau dogs	15	40891278	G	A	0.4294	19.1452	intron_variant	ENSCAFG00000007270
Tibetan Plateau dogs	15	40901780	A	G	0.45	19.1452	intron_variant	ENSCAFG00000007270
Tibetan Plateau dogs	15	40933687	C	A	0.45	19.1452	intron_variant	NUP37
Tibetan Plateau dogs	15	40948907	A	C	0.3912	19.1452	intron_variant	NUP37
Tibetan Plateau dogs	15	40968792	A	G	0.4088	19.1452	intron_variant	NUP37
Tibetan Plateau dogs	16	18806162	A	C	0.4294	14.2341	intergenic_variant
Tibetan Plateau dogs	16	18836497	A	G	0.4794	14.2341	intergenic_variant
Tibetan Plateau dogs	16	18860675	A	G	0.3559	14.2341	intergenic_variant
Tibetan Plateau dogs	16	18863131	A	G	0.3382	14.2341	intergenic_variant
Tibetan Plateau dogs	16	18906794	A	C	0.45	14.2341	intergenic_variant
Tibetan Plateau dogs	16	18913333	A	G	0.1088	14.2341	intergenic_variant
Tibetan Plateau dogs	16	18921945	A	G	0.4441	14.2341	upstream_gene_variant	ENSCAFG00000040168
Tibetan Plateau dogs	16	18942452	A	G	0.3912	14.2341	upstream_gene_variant	ENSCAFG00000034588
Tibetan Plateau dogs	16	18944928	G	A	0.4647	14.2341	upstream_gene_variant	ENSCAFG00000034588
Tibetan Plateau dogs	16	18959106	A	G	0.3601	14.2341	intergenic_variant
Tibetan Plateau dogs	16	18975070	A	G	0.05588	14.2341	intergenic_variant
Tibetan Plateau dogs	16	26003066	A	G	0.3118	14.2645	intron_variant	ENSCAFG00000005818
Tibetan Plateau dogs	16	26032741	A	G	0.3861	14.2645	synonymous_variant	ENSCAFG00000005828
Tibetan Plateau dogs	16	26042414	A	C	0.3353	14.2645	downstream_gene_variant	ENSCAFG00000005832
Tibetan Plateau dogs	16	26055075	A	G	0.2824	14.2645	downstream_gene_variant	ENSCAFG00000005832
Tibetan Plateau dogs	16	26149549	G	A	0.3147	14.2645	intron_variant	ENSCAFG00000005832
Tibetan Plateau dogs	16	39601012	G	A	0.3324	13.9739	intergenic_variant
Tibetan Plateau dogs	16	39603498	C	A	0.1559	13.9739	intergenic_variant
Tibetan Plateau dogs	16	39621434	C	A	0.4324	13.9739	intergenic_variant
Tibetan Plateau dogs	16	39631263	A	G	0.1441	13.9739	intergenic_variant
Tibetan Plateau dogs	16	39645301	A	C	0.15	13.9739	intergenic_variant
Tibetan Plateau dogs	16	39657738	A	G	0.2353	13.9739	intergenic_variant
Tibetan Plateau dogs	16	39668574	G	A	0.35	13.9739	intergenic_variant
Tibetan Plateau dogs	16	39673405	G	A	0.2235	13.9739	intergenic_variant
Tibetan Plateau dogs	16	39685043	A	G	0.2235	13.9739	upstream_gene_variant	RF00100
Tibetan Plateau dogs	16	39733767	G	A	0.1265	13.9739	intergenic_variant
Tibetan Plateau dogs	16	39766193	G	A	0.2853	13.9739	intergenic_variant
Tibetan Plateau dogs	16	39791411	C	A	0.3265	13.9739	intergenic_variant
Tibetan Plateau dogs	18	3855766	A	G	0.2265	13.2572	intergenic_variant
Tibetan Plateau dogs	18	3881711	A	G	0.2765	13.2572	intergenic_variant
Tibetan Plateau dogs	18	3893337	G	A	0.2706	13.2572	intergenic_variant
Tibetan Plateau dogs	18	3910694	G	A	0.2882	13.2572	intergenic_variant
Tibetan Plateau dogs	18	3915132	C	A	0.2794	13.2572	intergenic_variant
Tibetan Plateau dogs	18	3989745	G	A	0.2118	13.2572	intergenic_variant
Tibetan Plateau dogs	18	23601689	G	A	0.4676	13.5979	intron_variant	SEMA3A
Tibetan Plateau dogs	18	23637591	G	A	0.2412	13.5979	intergenic_variant
Tibetan Plateau dogs	18	23653869	A	G	0.3176	13.5979	intergenic_variant
Tibetan Plateau dogs	18	23660528	A	G	0.4029	13.5979	intergenic_variant
Tibetan Plateau dogs	18	23690594	G	A	0.2412	13.5979	intergenic_variant
Tibetan Plateau dogs	18	23711404	G	A	0.4029	13.5979	intergenic_variant
Tibetan Plateau dogs	18	23723807	A	G	0.2735	13.5979	intergenic_variant
Tibetan Plateau dogs	18	23748044	A	G	0.3853	13.5979	intergenic_variant
Tibetan Plateau dogs	18	23764227	G	A	0.3676	13.5979	intergenic_variant
Tibetan Plateau dogs	18	23778631	A	G	0.2206	13.5979	intergenic_variant
Tibetan Plateau dogs	18	23785075	A	G	0.2059	13.5979	intergenic_variant
Tibetan Plateau dogs	18	23798117	A	G	0.3324	13.5979	intergenic_variant
Tibetan Plateau dogs	18	25603470	A	G	0.1441	18.2942	synonymous_variant	PTDSS2
Tibetan Plateau dogs	18	25670660	G	A	0.05	18.2942	upstream_gene_variant	LMNTD2
Tibetan Plateau dogs	18	25694030	A	G	0.05588	18.2942	intron_variant	PHRF1
Tibetan Plateau dogs	18	25703264	A	G	0.1647	18.2942	intron_variant	PHRF1
Tibetan Plateau dogs	18	25712910	A	G	0.1706	18.2942	downstream_gene_variant	PHRF1
Tibetan Plateau dogs	18	25716866	A	G	0.1529	18.2942	intron_variant	DEAF1
Tibetan Plateau dogs	18	25740090	A	G	0.09118	18.2942	downstream_gene_variant	TMEM80
Tibetan Plateau dogs	18	25788213	A	G	0.2441	18.2942	intergenic_variant
Tibetan Plateau dogs	18	25794581	G	A	0.2441	18.2942	intergenic_variant
Tibetan Plateau dogs	18	25794911	G	A	0.2441	18.2942	intergenic_variant
Tibetan Plateau dogs	19	13418446	A	G	0.3147	24.9285	intergenic_variant
Tibetan Plateau dogs	19	13436604	A	G	0.2425	24.9285	intergenic_variant
Tibetan Plateau dogs	19	13450005	G	A	0.1853	24.9285	intergenic_variant
Tibetan Plateau dogs	19	13475048	A	C	0.1647	24.9285	intergenic_variant
Tibetan Plateau dogs	19	13490236	G	A	0.2324	24.9285	intergenic_variant
Tibetan Plateau dogs	19	13503717	A	G	0.2324	24.9285	intergenic_variant
Tibetan Plateau dogs	19	13529128	G	A	0.1676	24.9285	intergenic_variant
Tibetan Plateau dogs	19	13533248	A	G	0.1706	24.9285	intergenic_variant
Tibetan Plateau dogs	19	13557583	G	A	0.1853	24.9285	intergenic_variant
Tibetan Plateau dogs	19	13571953	A	G	0.1853	24.9285	intergenic_variant
Tibetan Plateau dogs	19	13582441	A	G	0.1853	24.9285	intergenic_variant
Tibetan Plateau dogs	19	13599555	G	A	0.2324	24.9285	intergenic_variant
Tibetan Plateau dogs	19	13609875	G	A	0.2147	15.3155	intergenic_variant
Tibetan Plateau dogs	19	13617999	G	A	0.2147	15.3155	intergenic_variant
Tibetan Plateau dogs	19	13629767	A	G	0.2147	15.3155	upstream_gene_variant	ENSCAFG00000005164
Tibetan Plateau dogs	19	13635747	A	C	0.2735	15.3155	intergenic_variant
Tibetan Plateau dogs	19	13702685	G	A	0.3118	15.3155	intergenic_variant
Tibetan Plateau dogs	19	13737190	G	A	0.3294	15.3155	intergenic_variant
Tibetan Plateau dogs	19	13741458	A	C	0.2441	15.3155	intergenic_variant
Tibetan Plateau dogs	19	13751935	G	A	0.2441	15.3155	intergenic_variant
Tibetan Plateau dogs	19	13771535	G	A	0.4083	15.3155	intergenic_variant
Tibetan Plateau dogs	19	13780400	G	A	0.05588	15.3155	intergenic_variant
Tibetan Plateau dogs	19	13787842	A	G	0.2396	15.3155	intergenic_variant
Tibetan Plateau dogs	21	28001896	A	G	0.1584	17.2325	intergenic_variant
Tibetan Plateau dogs	21	28044280	G	A	0.4971	17.2325	downstream_gene_variant	OR52A1
Tibetan Plateau dogs	21	28048998	A	C	0.4147	17.2325	upstream_gene_variant	OR52A1
Tibetan Plateau dogs	21	28071048	C	A	0.2176	17.2325	intergenic_variant
Tibetan Plateau dogs	21	28100570	G	A	0.2118	17.2325	intergenic_variant
Tibetan Plateau dogs	21	28108304	A	G	0.4206	17.2325	downstream_gene_variant	ENSCAFG00000006135
Tibetan Plateau dogs	21	28120720	A	G	0.2882	17.2325	downstream_gene_variant	ENSCAFG00000030672
Tibetan Plateau dogs	21	28139840	G	A	0.3221	17.2325	upstream_gene_variant	OR51V1
Tibetan Plateau dogs	22	23080949	G	A	0.3412	17.6859	intergenic_variant
Tibetan Plateau dogs	22	23106452	G	A	0.4412	17.6859	intergenic_variant
Tibetan Plateau dogs	22	23116812	C	A	0.4382	17.6859	intergenic_variant
Tibetan Plateau dogs	22	23124770	A	G	0.4382	17.6859	intergenic_variant
Tibetan Plateau dogs	22	23132424	A	G	0.4382	17.6859	upstream_gene_variant	ENSCAFG00000033410
Tibetan Plateau dogs	22	23135474	A	G	0.4382	17.6859	upstream_gene_variant	ENSCAFG00000033410
Tibetan Plateau dogs	22	23147681	A	G	0.3853	17.6859	intron_variant&non_coding_transcript_variant	ENSCAFG00000033410
Tibetan Plateau dogs	22	23162091	A	G	0.2206	17.6859	intergenic_variant
Tibetan Plateau dogs	22	23191614	G	A	0.2971	17.6859	intergenic_variant
Tibetan Plateau dogs	22	23194123	A	G	0.4088	17.6859	intergenic_variant
Tibetan Plateau dogs	24	4001668	A	G	0.06471	15.0559	intron_variant&non_coding_transcript_variant	ENSCAFG00000038256
Tibetan Plateau dogs	24	4054017	A	G	0.4941	15.0559	intergenic_variant
Tibetan Plateau dogs	24	4082119	G	A	0.3147	15.0559	upstream_gene_variant	ENSCAFG00000034875
Tibetan Plateau dogs	24	4104515	G	A	0.09118	15.0559	intergenic_variant
Tibetan Plateau dogs	24	4112531	A	G	0.2176	15.0559	intergenic_variant
Tibetan Plateau dogs	24	4130294	G	A	0.2118	15.0559	intergenic_variant
Tibetan Plateau dogs	24	4141603	G	A	0.4735	15.0559	intergenic_variant
Tibetan Plateau dogs	24	4146130	A	G	0.2235	15.0559	intergenic_variant
Tibetan Plateau dogs	24	4154890	G	A	0.2971	15.0559	intergenic_variant
Tibetan Plateau dogs	24	4165545	C	A	0.1647	15.0559	intergenic_variant
Tibetan Plateau dogs	24	4171821	A	C	0.09118	15.0559	intergenic_variant
Tibetan Plateau dogs	24	4198111	A	G	0.2882	15.0559	intergenic_variant
Tibetan Plateau dogs	24	4205344	A	G	0.09118	16.8589	intergenic_variant
Tibetan Plateau dogs	24	4225773	G	A	0.1353	16.8589	intergenic_variant
Tibetan Plateau dogs	24	4235944	G	A	0.2912	16.8589	intergenic_variant
Tibetan Plateau dogs	24	4255849	G	A	0.2088	16.8589	intergenic_variant
Tibetan Plateau dogs	24	4260116	G	A	0.1441	16.8589	intergenic_variant
Tibetan Plateau dogs	24	4288083	G	A	0.1794	16.8589	intergenic_variant
Tibetan Plateau dogs	24	4298397	G	A	0.1824	16.8589	intergenic_variant
Tibetan Plateau dogs	24	4306925	G	A	0.1941	16.8589	intergenic_variant
Tibetan Plateau dogs	24	4318160	A	G	0.1147	16.8589	intergenic_variant
Tibetan Plateau dogs	24	4356804	A	G	0.1147	16.8589	intergenic_variant
Tibetan Plateau dogs	24	4378933	A	G	0.1647	16.8589	intron_variant	SCP2D1
Tibetan Plateau dogs	26	863466	A	G	0.2029	20.0779	intron_variant	EP400
Tibetan Plateau dogs	26	875116	G	A	0.2912	20.0779	intron_variant	EP400
Tibetan Plateau dogs	26	899272	A	G	0.2588	20.0779	intron_variant	EP400
Tibetan Plateau dogs	26	903677	A	G	0.2147	20.0779	intron_variant	EP400
Tibetan Plateau dogs	26	913186	A	G	0.1206	20.0779	intron_variant	EP400
Tibetan Plateau dogs	26	915242	G	A	0.4353	20.0779	intron_variant	EP400
Tibetan Plateau dogs	26	927819	A	G	0.2147	20.0779	intron_variant	EP400
Tibetan Plateau dogs	26	941170	G	A	0.25	20.0779	upstream_gene_variant	EP400
Tibetan Plateau dogs	26	956412	G	A	0.2382	20.0779	intron_variant	PUS1
Tibetan Plateau dogs	27	3837914	A	G	0.1412	13.8939	intergenic_variant
Tibetan Plateau dogs	27	3894841	G	A	0.2176	13.8939	intron_variant	TMPRSS12
Tibetan Plateau dogs	27	3916212	A	C	0.4882	13.8939	downstream_gene_variant	ATF1
Tibetan Plateau dogs	27	3918048	A	G	0.1147	13.8939	downstream_gene_variant	ATF1
Tibetan Plateau dogs	27	3961257	G	A	0.1147	13.8939	intron_variant	ATF1
Tibetan Plateau dogs	27	3991083	A	G	0.4971	13.8939	intergenic_variant
Tibetan Plateau dogs	29	16613720	C	A	0.4735	18.4046	intron_variant	CSPP1
Tibetan Plateau dogs	29	16633924	G	A	0.4559	18.4046	missense_variant	CSPP1
Tibetan Plateau dogs	29	16647730	G	A	0.4735	18.4046	intron_variant	CSPP1
Tibetan Plateau dogs	29	16670713	A	G	0.4706	18.4046	intron_variant	CSPP1
Tibetan Plateau dogs	29	16679740	A	G	0.45	18.4046	intron_variant	CSPP1
Tibetan Plateau dogs	29	16693692	A	G	0.4324	18.4046	intron_variant	CSPP1
Tibetan Plateau dogs	29	16712521	C	A	0.4941	18.4046	3_prime_UTR_variant	CSPP1
Tibetan Plateau dogs	29	16722207	A	G	0.35	18.4046	intron_variant	ARFGEF1
Tibetan Plateau dogs	29	16745124	G	A	0.45	18.4046	intron_variant	ARFGEF1
Tibetan Plateau dogs	32	4604343	G	A	0.2706	13.5963	intron_variant	CFAP299
Tibetan Plateau dogs	32	4619117	A	G	0.1735	13.5963	intron_variant	CFAP299
Tibetan Plateau dogs	32	4634432	G	A	0.1588	13.5963	intron_variant	CFAP299
Tibetan Plateau dogs	32	4663961	A	G	0.1588	13.5963	intron_variant	CFAP299
Tibetan Plateau dogs	32	4675442	A	G	0.1588	13.5963	intron_variant	CFAP299
Tibetan Plateau dogs	32	4706040	A	G	0.2941	13.5963	intron_variant	CFAP299
Tibetan Plateau dogs	32	4709076	C	A	0.06471	13.5963	intron_variant	CFAP299
Tibetan Plateau dogs	32	4721466	A	G	0.3059	13.5963	intron_variant	CFAP299
Tibetan Plateau dogs	32	4785461	A	G	0.1647	13.5963	intron_variant	CFAP299
Tibetan Plateau dogs	32	4788528	A	G	0.1529	13.5963	intron_variant	CFAP299
Tibetan Plateau dogs	37	428306	A	G	0.1	20.815	upstream_gene_variant	ASNSD1
Tibetan Plateau dogs	37	438664	A	C	0.35	20.815	downstream_gene_variant	ASNSD1
Tibetan Plateau dogs	37	453784	A	G	0.3235	20.815	intron_variant	ANKAR
Tibetan Plateau dogs	37	466325	G	A	0.2853	20.815	intron_variant	ANKAR
Tibetan Plateau dogs	37	478913	G	A	0.3088	20.815	intron_variant	ANKAR
Tibetan Plateau dogs	37	513813	A	G	0.2471	20.815	intron_variant	ORMDL1
Tibetan Plateau dogs	37	521033	G	A	0.2861	20.815	upstream_gene_variant	ORMDL1
Tibetan Plateau dogs	37	576856	A	G	0.2441	20.815	intron_variant	PMS1
Tibetan Plateau dogs	37	598888	C	A	0.3088	20.815	intron_variant	PMS1
Tibetan Plateau dogs	37	599678	A	G	0.2426	20.815	intron_variant	PMS1
Tibetan Plateau dogs	37	617762	G	A	0.3088	21.4793	intergenic_variant
Tibetan Plateau dogs	37	630530	G	A	0.08824	21.4793	intergenic_variant
Tibetan Plateau dogs	37	672739	G	A	0.1618	21.4793	intergenic_variant
Tibetan Plateau dogs	37	736296	G	A	0.3088	21.4793	upstream_gene_variant	MSTN
Tibetan Plateau dogs	37	763860	G	A	0.3118	21.4793	intergenic_variant
Tibetan Plateau dogs	37	821616	A	G	0.1265	16.2351	intergenic_variant
Tibetan Plateau dogs	37	830308	G	A	0.05882	16.2351	intergenic_variant
Tibetan Plateau dogs	37	866740	A	G	0.09412	16.2351	intron_variant	HIBCH
Tibetan Plateau dogs	37	910776	A	G	0.09412	16.2351	intron_variant	HIBCH
Tibetan Plateau dogs	37	924553	G	A	0.4147	16.2351	intron_variant	HIBCH
Tibetan Plateau dogs	37	943096	C	A	0.4353	16.2351	intron_variant	HIBCH
Tibetan Plateau dogs	37	954476	A	G	0.4324	16.2351	intergenic_variant
Tibetan Plateau dogs	37	960851	A	G	0.4735	16.2351	intergenic_variant
Tibetan Plateau dogs	37	974287	C	A	0.1824	16.2351	upstream_gene_variant	INPP1
Tibetan Plateau dogs	37	981312	A	G	0.1765	16.2351	intron_variant	INPP1
Tibetan Plateau dogs	37	992176	A	G	0.1765	16.2351	downstream_gene_variant	INPP1
Mountain hounds	1	10683500	C	A	0.2751	7.6852	intron_variant&non_coding_transcript_variant	ENSCAFG00000040770
Mountain hounds	1	10699423	G	A	0.4059	7.6852	intron_variant&non_coding_transcript_variant	ENSCAFG00000040770
Mountain hounds	1	10756573	G	A	0.3176	7.6852	upstream_gene_variant	ENSCAFG00000040770
Mountain hounds	1	10780593	G	A	0.4824	7.6852	intergenic_variant
Mountain hounds	1	10792454	A	C	0.2663	7.6852	intergenic_variant
Mountain hounds	1	26011430	A	G	0.4382	9.48051	intergenic_variant
Mountain hounds	1	26012685	G	A	0.1912	9.48051	intergenic_variant
Mountain hounds	1	26025701	G	A	0.1235	9.48051	downstream_gene_variant	ENSCAFG00000000193
Mountain hounds	1	26044599	A	G	0.1765	9.48051	intergenic_variant
Mountain hounds	1	26055085	A	G	0.2471	9.48051	intergenic_variant
Mountain hounds	1	26072659	G	A	0.2353	9.48051	intergenic_variant
Mountain hounds	1	26095136	A	C	0.1206	9.48051	intergenic_variant
Mountain hounds	1	26104827	G	A	0.1706	9.48051	intergenic_variant
Mountain hounds	1	26120031	G	A	0.3735	9.48051	intergenic_variant
Mountain hounds	1	26144928	A	C	0.3206	9.48051	intergenic_variant
Mountain hounds	1	26156743	G	A	0.3588	9.48051	intergenic_variant
Mountain hounds	1	26170953	G	A	0.1941	9.48051	intergenic_variant
Mountain hounds	1	26180965	A	C	0.1265	9.48051	intergenic_variant
Mountain hounds	1	26193421	G	A	0.1529	9.48051	intergenic_variant
Mountain hounds	1	84464570	A	G	0.1765	7.52435	intergenic_variant
Mountain hounds	1	84471462	A	G	0.1824	7.52435	intergenic_variant
Mountain hounds	1	84487488	A	C	0.2722	7.52435	intergenic_variant
Mountain hounds	1	84507690	A	G	0.3353	7.52435	intergenic_variant
Mountain hounds	1	84516632	G	A	0.3029	7.52435	intergenic_variant
Mountain hounds	1	84531656	A	G	0.3559	7.52435	intergenic_variant
Mountain hounds	1	84545999	A	G	0.3765	7.52435	intergenic_variant
Mountain hounds	1	84552754	G	A	0.3647	7.52435	intergenic_variant
Mountain hounds	1	84573179	G	A	0.3176	7.52435	intergenic_variant
Mountain hounds	1	84574309	G	A	0.3824	7.52435	intergenic_variant
Mountain hounds	1	84588254	G	A	0.2088	7.52435	intergenic_variant
Mountain hounds	1	84598591	G	A	0.4147	7.52435	intergenic_variant
Mountain hounds	1	97881400	G	A	0.4235	9.75982	intergenic_variant
Mountain hounds	1	97917495	A	G	0.2559	9.75982	upstream_gene_variant	ENSCAFG00000040903
Mountain hounds	1	97955077	A	G	0.07941	9.75982	intron_variant	PTPDC1
Mountain hounds	1	97962547	A	G	0.07941	9.75982	upstream_gene_variant	PTPDC1
Mountain hounds	1	97986451	A	G	0.3559	9.75982	downstream_gene_variant	ENSCAFG00000038481
Mountain hounds	1	100441574	A	G	0.3794	7.55595	upstream_gene_variant	ENSCAFG00000029649
Mountain hounds	1	100490308	G	A	0.3794	7.55595	intergenic_variant
Mountain hounds	1	100515689	A	G	0.1412	7.55595	intron_variant	ZNF550
Mountain hounds	1	100530872	C	A	0.2235	7.55595	intergenic_variant
Mountain hounds	1	100571309	A	G	0.3735	7.55595	intron_variant	ENSCAFG00000032253
Mountain hounds	2	18431028	A	G	0.3912	7.18417	intergenic_variant
Mountain hounds	2	18490101	A	G	0.05882	7.18417	intron_variant	NSUN6
Mountain hounds	2	18544233	G	A	0.1	7.18417	intron_variant	CACNB2
Mountain hounds	2	18553933	A	C	0.05	7.18417	intron_variant	CACNB2
Mountain hounds	2	18560618	A	G	0.1529	7.18417	intron_variant	CACNB2
Mountain hounds	2	18572200	G	A	0.4265	7.18417	intron_variant	CACNB2
Mountain hounds	2	18595194	A	G	0.08529	7.18417	intron_variant	CACNB2
Mountain hounds	2	27222209	A	G	0.2088	7.20422	intergenic_variant
Mountain hounds	2	27231118	G	A	0.3794	7.20422	intergenic_variant
Mountain hounds	2	27241636	A	G	0.1941	7.20422	intergenic_variant
Mountain hounds	2	27256170	G	A	0.3706	7.20422	intergenic_variant
Mountain hounds	2	27274632	A	G	0.4559	7.20422	intergenic_variant
Mountain hounds	2	27329750	A	G	0.2029	7.20422	intergenic_variant
Mountain hounds	2	27333607	A	G	0.1294	7.20422	intergenic_variant
Mountain hounds	2	27352825	G	A	0.4559	7.20422	intergenic_variant
Mountain hounds	2	27375826	G	A	0.4029	7.20422	intergenic_variant
Mountain hounds	2	27379606	A	G	0.2853	7.20422	intergenic_variant
Mountain hounds	2	27391268	C	A	0.2912	7.20422	intergenic_variant
Mountain hounds	2	44423858	G	A	0.4912	7.13547	intergenic_variant
Mountain hounds	2	44450931	G	A	0.2676	7.13547	downstream_gene_variant	RF00406
Mountain hounds	2	44460182	A	C	0.06765	7.13547	intergenic_variant
Mountain hounds	2	44486994	A	G	0.2029	7.13547	intergenic_variant
Mountain hounds	2	44520333	G	A	0.4	7.13547	upstream_gene_variant	ENSCAFG00000006961
Mountain hounds	2	44536615	G	A	0.3912	7.13547	intron_variant&non_coding_transcript_variant	ENSCAFG00000037773
Mountain hounds	2	44561790	A	G	0.45	7.13547	intron_variant&non_coding_transcript_variant	ENSCAFG00000037773
Mountain hounds	2	44579873	A	G	0.3706	7.13547	intergenic_variant
Mountain hounds	2	44584861	C	A	0.3588	7.13547	intergenic_variant
Mountain hounds	2	54622400	A	G	0.2811	9.21534	intron_variant	SMN
Mountain hounds	2	54656088	A	G	0.1147	9.21534	intron_variant	BDP1
Mountain hounds	2	54662145	C	A	0.3265	9.21534	intron_variant	BDP1
Mountain hounds	2	54675722	A	G	0.1382	9.21534	intron_variant	BDP1
Mountain hounds	2	54689895	C	A	0.3324	9.21534	intron_variant	BDP1
Mountain hounds	2	54702027	A	G	0.2706	9.21534	missense_variant	BDP1
Mountain hounds	2	54709435	C	A	0.2706	9.21534	intron_variant	BDP1
Mountain hounds	2	54729413	A	G	0.3265	9.21534	intron_variant	BDP1
Mountain hounds	2	54737220	G	A	0.3382	9.21534	intron_variant	BDP1
Mountain hounds	2	54745649	G	A	0.3265	9.21534	downstream_gene_variant	BDP1
Mountain hounds	2	54774288	G	A	0.2706	9.21534	intron_variant	MCCC2
Mountain hounds	3	41803206	A	C	0.3118	8.827	intron_variant	IGF1R
Mountain hounds	3	41810394	G	A	0.2794	8.827	intron_variant	IGF1R
Mountain hounds	3	41826187	G	A	0.2647	8.827	intron_variant	IGF1R
Mountain hounds	3	41832554	A	G	0.2382	8.827	intron_variant	IGF1R
Mountain hounds	3	41851629	G	A	0.3	8.827	intron_variant	IGF1R
Mountain hounds	3	41856133	A	G	0.3029	8.827	intron_variant	IGF1R
Mountain hounds	3	41864215	A	G	0.2412	8.827	intron_variant	IGF1R
Mountain hounds	3	41876216	A	C	0.1765	8.827	intron_variant	IGF1R
Mountain hounds	3	41878168	C	A	0.2294	8.827	intron_variant	IGF1R
Mountain hounds	3	41893138	C	A	0.2412	8.827	intron_variant	IGF1R
Mountain hounds	3	41911682	C	A	0.2765	8.827	intron_variant	IGF1R
Mountain hounds	3	41924038	G	A	0.2324	8.827	intron_variant	IGF1R
Mountain hounds	3	41925149	A	G	0.3265	8.827	intron_variant	IGF1R
Mountain hounds	3	41941057	G	A	0.2382	8.827	intron_variant	IGF1R
Mountain hounds	3	41964263	A	G	0.2765	8.827	intron_variant	IGF1R
Mountain hounds	3	41970251	C	A	0.2588	8.827	intron_variant	IGF1R
Mountain hounds	3	41989695	A	G	0.2853	8.827	intron_variant	IGF1R
Mountain hounds	4	29230080	A	G	0.3412	8.36264	intergenic_variant
Mountain hounds	4	29232883	G	A	0.3905	8.36264	intergenic_variant
Mountain hounds	4	29245068	A	G	0.3	8.36264	intergenic_variant
Mountain hounds	4	29253905	C	A	0.2676	8.36264	intron_variant	ANXA11
Mountain hounds	4	29261821	C	A	0.2765	8.36264	intron_variant	ANXA11
Mountain hounds	4	29266399	G	A	0.4559	8.36264	downstream_gene_variant	ANXA11
Mountain hounds	4	29278846	A	G	0.4618	8.36264	intergenic_variant
Mountain hounds	4	29332250	G	A	0.2147	8.36264	upstream_gene_variant	RF00100
Mountain hounds	4	29343458	A	G	0.2588	8.36264	intron_variant	ENSCAFG00000023232
Mountain hounds	4	29349306	G	A	0.3618	8.36264	downstream_gene_variant	ENSCAFG00000023232
Mountain hounds	4	29365350	G	A	0.1382	8.36264	intergenic_variant
Mountain hounds	4	29373522	G	A	0.1647	8.36264	intergenic_variant
Mountain hounds	5	2825234	A	G	0.3265	8.16992	intron_variant	NTM
Mountain hounds	5	2832395	A	G	0.2529	8.16992	intron_variant	NTM
Mountain hounds	5	2873022	G	A	0.3647	8.16992	intron_variant	NTM
Mountain hounds	5	2899828	G	A	0.4206	8.16992	upstream_gene_variant	NTM
Mountain hounds	5	2932294	G	A	0.2559	8.16992	intron_variant	NTM
Mountain hounds	5	2951769	G	A	0.3118	8.16992	intron_variant	NTM
Mountain hounds	5	2976132	A	G	0.2618	8.16992	intron_variant	NTM
Mountain hounds	5	2998128	G	A	0.2647	8.16992	intron_variant	NTM
Mountain hounds	5	3218680	A	G	0.1971	8.01785	intergenic_variant
Mountain hounds	5	3261207	A	C	0.284	8.01785	intergenic_variant
Mountain hounds	5	3285305	G	A	0.4441	8.01785	intergenic_variant
Mountain hounds	5	3304165	G	A	0.4971	8.01785	intergenic_variant
Mountain hounds	5	3368468	A	G	0.4059	8.01785	intron_variant&non_coding_transcript_variant	ENSCAFG00000034953
Mountain hounds	5	3368838	A	G	0.4176	8.01785	intron_variant&non_coding_transcript_variant	ENSCAFG00000034953
Mountain hounds	5	3373215	A	G	0.3735	8.01785	intron_variant&non_coding_transcript_variant	ENSCAFG00000034953
Mountain hounds	5	3379769	A	G	0.3882	8.01785	intron_variant&non_coding_transcript_variant	ENSCAFG00000034953
Mountain hounds	5	3392933	A	C	0.2658	8.01785	intron_variant&non_coding_transcript_variant	ENSCAFG00000034953
Mountain hounds	5	3629039	G	A	0.4235	7.61981	intron_variant&non_coding_transcript_variant	ENSCAFG00000034838
Mountain hounds	5	3637992	G	A	0.429	7.61981	intron_variant&non_coding_transcript_variant	ENSCAFG00000034838
Mountain hounds	5	3651065	A	G	0.3971	7.61981	intron_variant&non_coding_transcript_variant	ENSCAFG00000034838
Mountain hounds	5	3662272	A	G	0.3441	7.61981	upstream_gene_variant	ENSCAFG00000034838
Mountain hounds	5	3668337	C	A	0.3529	7.61981	intergenic_variant
Mountain hounds	5	3677768	A	G	0.3971	7.61981	intergenic_variant
Mountain hounds	5	3705023	A	G	0.3735	7.61981	intergenic_variant
Mountain hounds	5	3730764	A	G	0.4765	7.61981	intergenic_variant
Mountain hounds	5	3736188	A	G	0.4441	7.61981	intergenic_variant
Mountain hounds	5	3779184	A	G	0.4206	7.61981	intergenic_variant
Mountain hounds	5	3798629	G	A	0.4265	7.61981	intergenic_variant
Mountain hounds	5	4403730	G	A	0.2235	11.2527	intergenic_variant
Mountain hounds	5	4407648	G	A	0.2235	11.2527	intergenic_variant
Mountain hounds	5	4421494	A	C	0.2235	11.2527	intergenic_variant
Mountain hounds	5	4447152	C	A	0.2471	11.2527	intergenic_variant
Mountain hounds	5	4513460	G	A	0.08529	11.2527	intron_variant	ADAMTS8
Mountain hounds	5	4529211	A	G	0.1235	11.2527	intergenic_variant
Mountain hounds	5	4548450	A	G	0.1235	11.2527	intergenic_variant
Mountain hounds	5	4571247	G	A	0.3588	11.2527	intergenic_variant
Mountain hounds	5	4584168	C	A	0.2853	11.2527	intergenic_variant
Mountain hounds	5	62232293	G	A	0.1324	7.86675	intron_variant	RERE
Mountain hounds	5	62301850	C	A	0.4265	7.86675	intron_variant	ENO1
Mountain hounds	5	62328770	A	G	0.2	7.86675	intergenic_variant
Mountain hounds	5	62333724	A	G	0.1971	7.86675	intergenic_variant
Mountain hounds	5	62355880	A	G	0.2647	7.86675	upstream_gene_variant	CA6
Mountain hounds	5	62375943	G	A	0.4029	7.86675	intron_variant	CA6
Mountain hounds	5	62396246	G	A	0.1893	7.86675	intergenic_variant
Mountain hounds	5	62407547	G	A	0.3588	9.74094	intergenic_variant
Mountain hounds	5	62413517	A	C	0.2294	9.74094	3_prime_UTR_variant	SLC2A5
Mountain hounds	5	62426279	A	G	0.3765	9.74094	intron_variant	SLC2A5
Mountain hounds	5	62437664	A	C	0.1941	9.74094	upstream_gene_variant	SLC2A5
Mountain hounds	5	62460311	A	G	0.1824	9.74094	intron_variant	GPR157
Mountain hounds	5	62476664	A	C	0.4735	9.74094	upstream_gene_variant	GPR157
Mountain hounds	5	62514765	C	A	0.2441	9.74094	intergenic_variant
Mountain hounds	5	62545255	A	G	0.5	9.74094	upstream_gene_variant	H6PD
Mountain hounds	5	62556270	A	G	0.4822	9.74094	missense_variant	H6PD
Mountain hounds	5	62574334	A	G	0.4794	9.74094	downstream_gene_variant	H6PD
Mountain hounds	5	62581852	A	C	0.08235	9.74094	downstream_gene_variant	H6PD
Mountain hounds	5	62585282	A	G	0.1647	9.74094	intergenic_variant
Mountain hounds	5	62600148	A	G	0.1588	9.81055	upstream_gene_variant	SPSB1
Mountain hounds	5	62619394	G	A	0.2265	9.81055	intron_variant	SPSB1
Mountain hounds	5	62644047	G	A	0.07647	9.81055	intron_variant	SPSB1
Mountain hounds	5	62664547	G	A	0.3853	9.81055	intron_variant	SPSB1
Mountain hounds	5	62669756	A	G	0.3853	9.81055	downstream_gene_variant	SPSB1
Mountain hounds	5	62680392	G	A	0.4206	9.81055	intergenic_variant
Mountain hounds	5	62733999	G	A	0.2	9.81055	intergenic_variant
Mountain hounds	5	62742697	G	A	0.3088	9.81055	intergenic_variant
Mountain hounds	5	62751958	A	C	0.3059	9.81055	downstream_gene_variant	ENSCAFG00000038637
Mountain hounds	5	62770492	G	A	0.1029	9.81055	intergenic_variant
Mountain hounds	5	62797077	G	A	0.1706	9.81055	intron_variant	SLC25A33
Mountain hounds	5	63053063	A	G	0.2912	12.3593	intron_variant	CTNNBIP1
Mountain hounds	5	63069121	G	A	0.4853	12.3593	upstream_gene_variant	CTNNBIP1
Mountain hounds	5	63069986	A	G	0.2353	12.3593	intergenic_variant
Mountain hounds	5	63074050	A	C	0.3912	12.3593	intergenic_variant
Mountain hounds	5	63074269	A	G	0.3912	12.3593	intergenic_variant
Mountain hounds	5	63088312	A	G	0.07941	12.3593	intergenic_variant
Mountain hounds	5	63099038	G	A	0.4324	12.3593	intergenic_variant
Mountain hounds	5	63109708	G	A	0.4265	12.3593	downstream_gene_variant	LZIC
Mountain hounds	5	63135157	G	A	0.3765	12.3593	intron_variant	NMNAT1
Mountain hounds	5	63145817	G	A	0.1235	12.3593	5_prime_UTR_variant	NMNAT1
Mountain hounds	5	63159139	G	A	0.08824	12.3593	downstream_gene_variant	NMNAT1
Mountain hounds	5	63166027	C	A	0.3794	12.3593	intron_variant	RBP7
Mountain hounds	5	63177206	A	G	0.3	12.3593	synonymous_variant	RBP7
Mountain hounds	5	63406809	C	A	0.07941	7.30598	intron_variant	KIF1B
Mountain hounds	5	63425212	G	A	0.2235	7.30598	intron_variant	KIF1B
Mountain hounds	5	63447489	G	A	0.2824	7.30598	intron_variant	KIF1B
Mountain hounds	5	63458945	A	G	0.2824	7.30598	intron_variant	KIF1B
Mountain hounds	5	63467912	G	A	0.2853	7.30598	intron_variant	KIF1B
Mountain hounds	5	63490517	A	G	0.2765	7.30598	intron_variant	KIF1B
Mountain hounds	5	63498067	A	G	0.2765	7.30598	intron_variant	KIF1B
Mountain hounds	5	63506496	G	A	0.2765	7.30598	intron_variant	KIF1B
Mountain hounds	5	63520829	A	G	0.3647	7.30598	downstream_gene_variant	KIF1B
Mountain hounds	5	63539215	A	G	0.497	7.30598	intergenic_variant
Mountain hounds	5	63551550	A	G	0.2294	7.30598	intergenic_variant
Mountain hounds	5	63561506	G	A	0.07353	7.30598	intergenic_variant
Mountain hounds	5	63573111	A	G	0.2559	7.30598	intron_variant	ENSCAFG00000024062
Mountain hounds	5	63578189	A	G	0.2559	7.30598	intron_variant	ENSCAFG00000024062
Mountain hounds	5	63600895	A	G	0.08824	11.3894	intron_variant	GAS8
Mountain hounds	5	63622336	A	G	0.2265	11.3894	downstream_gene_variant	DBNDD1
Mountain hounds	5	63639713	G	A	0.2308	11.3894	intergenic_variant
Mountain hounds	5	63666161	A	G	0.4029	11.3894	intron_variant	DEF8
Mountain hounds	5	63670950	A	C	0.2529	11.3894	intron_variant	DEF8
Mountain hounds	5	63683288	A	G	0.2265	11.3894	intron_variant	ENSCAFG00000019807
Mountain hounds	5	63694982	G	A	0.4	11.3894	upstream_gene_variant	ENSCAFG00000019807
Mountain hounds	5	63710280	G	A	0.1824	11.3894	intron_variant	TCF25
Mountain hounds	5	63718071	G	A	0.1971	11.3894	intron_variant	TCF25
Mountain hounds	5	63728735	A	G	0.4441	11.3894	intron_variant	TCF25
Mountain hounds	5	63770156	G	A	0.2824	11.3894	upstream_gene_variant	SPIRE2
Mountain hounds	5	63794190	G	A	0.4412	11.3894	intron_variant	FANCA
Mountain hounds	5	63814579	A	G	0.4647	10.0007	synonymous_variant	FANCA
Mountain hounds	5	63824573	A	G	0.09412	10.0007	intron_variant	FANCA
Mountain hounds	5	63831558	A	G	0.4412	10.0007	intron_variant	FANCA
Mountain hounds	5	63842819	G	A	0.4618	10.0007	downstream_gene_variant	FANCA
Mountain hounds	5	63853611	A	G	0.4647	10.0007	intron_variant	ZNF276
Mountain hounds	5	63865038	A	G	0.1441	10.0007	stop_retained_variant	VPS9D1
Mountain hounds	5	63902763	G	A	0.1529	10.0007	intron_variant	CHMP1A
Mountain hounds	5	63910913	A	G	0.3559	10.0007	splice_region_variant&intron_variant	DPEP1
Mountain hounds	5	63914486	A	G	0.2147	10.0007	intron_variant	DPEP1
Mountain hounds	5	63928160	A	G	0.05882	10.0007	intergenic_variant
Mountain hounds	5	63933125	G	A	0.2265	10.0007	intergenic_variant
Mountain hounds	5	63971390	G	A	0.4912	10.0007	upstream_gene_variant	CPNE7
Mountain hounds	5	64611038	A	G	0.4882	7.15036	upstream_gene_variant	PIEZO1
Mountain hounds	5	64614656	A	G	0.4912	7.15036	intron_variant	PIEZO1
Mountain hounds	5	64630776	A	G	0.4824	7.15036	splice_region_variant&intron_variant	PIEZO1
Mountain hounds	5	64655516	G	A	0.369	7.15036	downstream_gene_variant	RNF166
Mountain hounds	5	64662160	A	G	0.2735	7.15036	intron_variant	SNAI3
Mountain hounds	5	64666164	G	A	0.3735	7.15036	intron_variant	SNAI3
Mountain hounds	5	64671117	A	G	0.3294	7.15036	3_prime_UTR_variant	SNAI3
Mountain hounds	5	64716321	A	G	0.25	7.15036	intron_variant	ZC3H18
Mountain hounds	5	64735636	C	A	0.2147	7.15036	intron_variant	ZC3H18
Mountain hounds	5	64740619	C	A	0.2147	7.15036	intron_variant	ZC3H18
Mountain hounds	5	64743518	G	A	0.25	7.15036	intron_variant	ZC3H18
Mountain hounds	5	64754407	G	A	0.4676	7.15036	intron_variant	ZC3H18
Mountain hounds	5	64755545	G	A	0.4647	7.15036	intron_variant	ZC3H18
Mountain hounds	5	64770397	A	G	0.2088	7.15036	upstream_gene_variant	ZC3H18
Mountain hounds	5	64778384	A	G	0.09706	7.15036	intron_variant	ENSCAFG00000029455
Mountain hounds	5	64794990	A	G	0.1	7.15036	intron_variant	ENSCAFG00000029455
Mountain hounds	5	64797051	G	A	0.1441	7.15036	intron_variant	ENSCAFG00000029455
Mountain hounds	5	64797130	A	G	0.1	7.15036	intron_variant	ENSCAFG00000029455
Mountain hounds	6	17617874	G	A	0.4324	7.80807	intron_variant	ITGAL
Mountain hounds	6	17630366	G	A	0.3941	7.80807	intron_variant	ITGAL
Mountain hounds	6	17638496	A	G	0.2265	7.80807	intron_variant	ITGAL
Mountain hounds	6	17643301	G	A	0.3824	7.80807	intron_variant	ITGAL
Mountain hounds	6	17690010	A	G	0.4029	7.80807	intron_variant	ZNF771
Mountain hounds	6	17702900	A	G	0.4324	7.80807	downstream_gene_variant	ZNF48
Mountain hounds	6	17716382	G	A	0.3882	7.80807	downstream_gene_variant	MYLPF
Mountain hounds	6	17735565	G	A	0.1676	7.80807	downstream_gene_variant	ENSCAFG00000016940
Mountain hounds	6	17744938	A	G	0.2735	7.80807	downstream_gene_variant	CD2BP2
Mountain hounds	6	17757479	A	G	0.2765	7.80807	intergenic_variant
Mountain hounds	6	17777786	A	G	0.1676	7.80807	upstream_gene_variant	QPRT
Mountain hounds	6	17780872	A	G	0.4882	7.80807	intron_variant	QPRT
Mountain hounds	6	17796870	A	G	0.3559	7.80807	3_prime_UTR_variant	QPRT
Mountain hounds	6	39092632	A	G	0.4294	8.11654	intron_variant	HAGH
Mountain hounds	6	39106048	G	A	0.4324	8.11654	downstream_gene_variant	HAGH
Mountain hounds	6	39149168	A	G	0.4265	8.11654	intron_variant	MAPK8IP3
Mountain hounds	6	39183212	G	A	0.3971	8.11654	upstream_gene_variant	MAPK8IP3
Mountain hounds	6	39197910	A	G	0.3941	8.11654	downstream_gene_variant	CRAMP1
Mountain hounds	14	15404719	G	A	0.08235	7.48403	downstream_gene_variant	ENSCAFG00000038636
Mountain hounds	14	15412243	G	A	0.3941	7.48403	intron_variant&non_coding_transcript_variant	ENSCAFG00000038636
Mountain hounds	14	15427529	G	A	0.45	7.48403	intron_variant&non_coding_transcript_variant	ENSCAFG00000038636
Mountain hounds	14	15434059	A	C	0.213	7.48403	intron_variant&non_coding_transcript_variant	ENSCAFG00000038636
Mountain hounds	14	15451035	G	A	0.3324	7.48403	intron_variant&non_coding_transcript_variant	ENSCAFG00000038636
Mountain hounds	14	15452710	A	G	0.2588	7.48403	intron_variant&non_coding_transcript_variant	ENSCAFG00000038636
Mountain hounds	14	15478746	A	G	0.4235	7.48403	intron_variant&non_coding_transcript_variant	ENSCAFG00000038636
Mountain hounds	14	15519080	C	A	0.4971	7.48403	non_coding_transcript_exon_variant	ENSCAFG00000038636
Mountain hounds	14	15520233	A	G	0.1471	7.48403	upstream_gene_variant	ENSCAFG00000038636
Mountain hounds	14	15556203	A	G	0.4294	7.48403	upstream_gene_variant	ENSCAFG00000034841
Mountain hounds	14	15573882	A	C	0.4379	7.48403	intron_variant&non_coding_transcript_variant	ENSCAFG00000034841
Mountain hounds	14	15580979	A	G	0.4882	7.48403	intron_variant&non_coding_transcript_variant	ENSCAFG00000034841
Mountain hounds	14	15592547	A	G	0.3618	7.48403	intron_variant&non_coding_transcript_variant	ENSCAFG00000034841
Mountain hounds	14	15610789	G	A	0.4735	8.92043	downstream_gene_variant	ENSCAFG00000034841
Mountain hounds	14	15618659	A	G	0.07941	8.92043	intergenic_variant
Mountain hounds	14	15625277	G	A	0.1265	8.92043	downstream_gene_variant	RF00026
Mountain hounds	14	15641556	G	A	0.4647	8.92043	intergenic_variant
Mountain hounds	14	15650941	A	G	0.4147	8.92043	intergenic_variant
Mountain hounds	14	15670933	A	G	0.4765	8.92043	intergenic_variant
Mountain hounds	14	15681837	A	G	0.4882	8.92043	intergenic_variant
Mountain hounds	14	15698182	G	A	0.4441	8.92043	intergenic_variant
Mountain hounds	14	15708435	A	G	0.3765	8.92043	upstream_gene_variant	ENSCAFG00000040353
Mountain hounds	14	15734263	A	G	0.2294	8.92043	intergenic_variant
Mountain hounds	14	15740764	G	A	0.1853	8.92043	intergenic_variant
Mountain hounds	14	15757415	G	A	0.06765	8.92043	intergenic_variant
Mountain hounds	14	15772893	A	G	0.1029	8.92043	intergenic_variant
Mountain hounds	14	15778977	G	A	0.1676	8.92043	intergenic_variant
Mountain hounds	14	15785551	G	A	0.1765	8.92043	intergenic_variant
Mountain hounds	14	26804932	C	A	0.3424	8.25597	intergenic_variant
Mountain hounds	14	26817949	C	A	0.4647	8.25597	intergenic_variant
Mountain hounds	14	26828037	A	G	0.4529	8.25597	intergenic_variant
Mountain hounds	14	26870155	C	A	0.2618	8.25597	intergenic_variant
Mountain hounds	14	26872008	C	A	0.3647	8.25597	intergenic_variant
Mountain hounds	14	26913512	A	C	0.4794	8.25597	intergenic_variant
Mountain hounds	14	26929309	G	A	0.1882	8.25597	intergenic_variant
Mountain hounds	14	26948396	A	G	0.3	8.25597	intergenic_variant
Mountain hounds	14	26957867	G	A	0.2471	8.25597	intergenic_variant
Mountain hounds	14	26963938	A	G	0.2412	8.25597	intergenic_variant
Mountain hounds	14	26987710	A	C	0.4794	8.25597	intergenic_variant
Mountain hounds	14	27012522	G	A	0.4794	7.39097	intergenic_variant
Mountain hounds	14	27032585	A	C	0.4324	7.39097	intergenic_variant
Mountain hounds	14	27037935	A	G	0.3529	7.39097	intergenic_variant
Mountain hounds	14	27053216	G	A	0.3402	7.39097	intergenic_variant
Mountain hounds	14	27063078	G	A	0.4353	7.39097	intergenic_variant
Mountain hounds	14	27100600	G	A	0.4676	7.39097	downstream_gene_variant	ENSCAFG00000040361
Mountain hounds	14	27112360	G	A	0.3794	7.39097	intron_variant&non_coding_transcript_variant	ENSCAFG00000040361
Mountain hounds	14	27137138	G	A	0.3618	7.39097	upstream_gene_variant	ENSCAFG00000002306
Mountain hounds	14	27187448	G	A	0.1647	7.39097	intergenic_variant
Mountain hounds	14	27197205	A	G	0.4265	7.39097	intergenic_variant
Mountain hounds	14	44826756	G	A	0.3676	7.36645	upstream_gene_variant	ENSCAFG00000033256
Mountain hounds	14	44851761	G	A	0.3882	7.36645	intergenic_variant
Mountain hounds	14	44858208	A	G	0.3882	7.36645	downstream_gene_variant	ENSCAFG00000030781
Mountain hounds	14	44875938	A	G	0.4294	7.36645	intergenic_variant
Mountain hounds	14	44999662	A	G	0.2765	7.36645	downstream_gene_variant	RP9
Mountain hounds	14	44999705	C	A	0.3824	7.36645	downstream_gene_variant	RP9
Mountain hounds	15	19404815	G	A	0.4412	7.0328	intron_variant	OSBPL8
Mountain hounds	15	19423529	A	G	0.1794	7.0328	intron_variant	OSBPL8
Mountain hounds	15	19439322	G	A	0.1706	7.0328	intron_variant	OSBPL8
Mountain hounds	15	19474995	G	A	0.4353	7.0328	intergenic_variant
Mountain hounds	15	19480350	A	G	0.2206	7.0328	intergenic_variant
Mountain hounds	15	19504670	C	A	0.2559	7.0328	intron_variant&non_coding_transcript_variant	ENSCAFG00000033788
Mountain hounds	15	19539571	A	G	0.4441	7.0328	intergenic_variant
Mountain hounds	15	19547949	A	G	0.3912	7.0328	intergenic_variant
Mountain hounds	15	19556834	A	G	0.4294	7.0328	downstream_gene_variant	RF00003
Mountain hounds	15	19583993	G	A	0.4882	7.0328	intergenic_variant
Mountain hounds	15	26605072	C	A	0.2706	6.98725	upstream_gene_variant	TSPAN19
Mountain hounds	15	26606559	A	G	0.2706	6.98725	upstream_gene_variant	TSPAN19
Mountain hounds	15	26617917	A	C	0.3588	6.98725	intron_variant	LRRIQ1
Mountain hounds	15	26640457	A	G	0.3912	6.98725	intron_variant	LRRIQ1
Mountain hounds	15	26670285	C	A	0.2811	6.98725	intron_variant	LRRIQ1
Mountain hounds	15	26679124	G	A	0.2882	6.98725	intron_variant	LRRIQ1
Mountain hounds	15	26700829	G	A	0.1853	6.98725	intron_variant	LRRIQ1
Mountain hounds	16	402799	A	C	0.2529	9.4576	intron_variant	TNS3
Mountain hounds	16	416768	A	G	0.4059	9.4576	intron_variant	TNS3
Mountain hounds	16	427208	A	G	0.25	9.4576	intron_variant	TNS3
Mountain hounds	16	442252	A	G	0.2235	9.4576	intergenic_variant
Mountain hounds	16	477729	A	C	0.3324	9.4576	intergenic_variant
Mountain hounds	16	483335	A	G	0.1206	9.4576	intergenic_variant
Mountain hounds	16	513352	A	G	0.1559	9.4576	intergenic_variant
Mountain hounds	16	535352	A	G	0.2059	9.4576	intergenic_variant
Mountain hounds	16	553210	A	C	0.1118	9.4576	intergenic_variant
Mountain hounds	16	586971	A	G	0.2054	9.4576	intergenic_variant
Mountain hounds	16	598568	A	G	0.3324	9.4576	intergenic_variant
Mountain hounds	16	2422960	A	G	0.09412	8.42556	intron_variant	ENSCAFG00000003479
Mountain hounds	16	2470546	A	C	0.2618	8.42556	intron_variant	ENSCAFG00000003479
Mountain hounds	16	2513770	A	G	0.2676	8.42556	intron_variant	ENSCAFG00000003479
Mountain hounds	16	2539698	A	G	0.2706	8.42556	intron_variant	ENSCAFG00000003479
Mountain hounds	16	2548875	A	G	0.3559	8.42556	intron_variant	ENSCAFG00000003479
Mountain hounds	16	2563415	G	A	0.2765	8.42556	intron_variant	ENSCAFG00000003479
Mountain hounds	16	2566744	G	A	0.3765	8.42556	intron_variant	ENSCAFG00000003479
Mountain hounds	17	4818802	A	G	0.2147	8.1645	intergenic_variant
Mountain hounds	17	4821635	A	G	0.1412	8.1645	intergenic_variant
Mountain hounds	17	4822511	A	G	0.1676	8.1645	intergenic_variant
Mountain hounds	17	4852818	G	A	0.4559	8.1645	intergenic_variant
Mountain hounds	17	4902502	G	A	0.3294	8.1645	intergenic_variant
Mountain hounds	17	4910296	A	G	0.05	8.1645	intergenic_variant
Mountain hounds	17	4917192	A	C	0.2294	8.1645	intergenic_variant
Mountain hounds	17	4926323	C	A	0.2088	8.1645	intergenic_variant
Mountain hounds	17	4950336	C	A	0.4941	8.1645	intergenic_variant
Mountain hounds	17	4968058	A	G	0.2647	8.1645	intergenic_variant
Mountain hounds	17	4974746	A	G	0.3147	8.1645	intergenic_variant
Mountain hounds	17	4999343	A	G	0.1941	8.1645	intergenic_variant
Mountain hounds	17	25016567	A	G	0.08824	7.54883	3_prime_UTR_variant	SRD5A2
Mountain hounds	17	25036960	G	A	0.1118	7.54883	intron_variant	SRD5A2
Mountain hounds	17	25040535	G	A	0.09118	7.54883	intron_variant	SRD5A2
Mountain hounds	17	25069471	A	G	0.4382	7.54883	intergenic_variant
Mountain hounds	17	25102243	G	A	0.3912	7.54883	downstream_gene_variant	ENSCAFG00000040576
Mountain hounds	17	25128622	A	G	0.06765	7.54883	upstream_gene_variant	ENSCAFG00000029734
Mountain hounds	17	25149587	A	G	0.2059	7.54883	intergenic_variant
Mountain hounds	17	25164337	G	A	0.1294	7.54883	intergenic_variant
Mountain hounds	17	25167427	G	A	0.3353	7.54883	intergenic_variant
Mountain hounds	18	1685600	G	A	0.08824	10.9867	intron_variant	IKZF1
Mountain hounds	18	1700747	C	A	0.08824	10.9867	intron_variant	IKZF1
Mountain hounds	18	1711575	A	G	0.1206	10.9867	intron_variant	IKZF1
Mountain hounds	18	1717732	C	A	0.1029	10.9867	intron_variant	IKZF1
Mountain hounds	18	1742491	A	G	0.3147	10.9867	intron_variant	IKZF1
Mountain hounds	20	15002046	A	G	0.05588	8.03679	intergenic_variant
Mountain hounds	20	15041862	A	G	0.4353	8.03679	downstream_gene_variant	ENSCAFG00000040572
Mountain hounds	20	15046742	A	G	0.2588	8.03679	intron_variant&non_coding_transcript_variant	ENSCAFG00000040572
Mountain hounds	20	15062943	G	A	0.08824	8.03679	intron_variant&non_coding_transcript_variant	ENSCAFG00000040572
Mountain hounds	20	15098161	A	C	0.07941	8.03679	intron_variant&non_coding_transcript_variant	ENSCAFG00000040572
Mountain hounds	20	15123681	A	G	0.1971	8.03679	upstream_gene_variant	ENSCAFG00000040572
Mountain hounds	20	15156200	G	A	0.4029	8.03679	intergenic_variant
Mountain hounds	20	15172497	A	G	0.1353	8.03679	intergenic_variant
Mountain hounds	20	15182099	G	A	0.07353	8.03679	intergenic_variant
Mountain hounds	20	15196606	G	A	0.4349	8.03679	intergenic_variant
Mountain hounds	20	21070680	A	G	0.3471	8.79211	intergenic_variant
Mountain hounds	20	21089822	G	A	0.1	8.79211	intergenic_variant
Mountain hounds	20	21117083	A	C	0.1118	8.79211	intergenic_variant
Mountain hounds	20	21128126	C	A	0.25	8.79211	intergenic_variant
Mountain hounds	20	21146516	G	A	0.4794	8.79211	intergenic_variant
Mountain hounds	20	21147364	A	G	0.4059	8.79211	intergenic_variant
Mountain hounds	20	21171369	G	A	0.1088	8.79211	intergenic_variant
Mountain hounds	20	21192952	A	G	0.4912	8.79211	intergenic_variant
Mountain hounds	20	21193444	A	G	0.4912	8.79211	intergenic_variant
Mountain hounds	20	30001140	G	A	0.4206	9.81573	intergenic_variant
Mountain hounds	20	30014320	A	G	0.2971	9.81573	intergenic_variant
Mountain hounds	20	30035312	A	G	0.2811	9.81573	intergenic_variant
Mountain hounds	20	30047585	G	A	0.2324	9.81573	intergenic_variant
Mountain hounds	20	30057440	A	G	0.1471	9.81573	intergenic_variant
Mountain hounds	20	30101829	G	A	0.2853	9.81573	intergenic_variant
Mountain hounds	20	30112836	A	G	0.1557	9.81573	intergenic_variant
Mountain hounds	20	30137710	G	A	0.3676	9.81573	intergenic_variant
Mountain hounds	20	30149595	G	A	0.4	9.81573	intergenic_variant
Mountain hounds	23	30810089	G	A	0.4588	8.17064	synonymous_variant	SLCO2A1
Mountain hounds	23	30810204	G	A	0.4588	8.17064	intron_variant	SLCO2A1
Mountain hounds	23	30834728	A	G	0.4588	8.17064	intron_variant	SLCO2A1
Mountain hounds	23	30844454	A	G	0.2059	8.17064	intron_variant	SLCO2A1
Mountain hounds	23	30848914	A	G	0.2853	8.17064	intron_variant	SLCO2A1
Mountain hounds	23	30866009	G	A	0.4	8.17064	intron_variant	SLCO2A1
Mountain hounds	23	30878626	A	G	0.4647	8.17064	upstream_gene_variant	SLCO2A1
Mountain hounds	23	31807982	A	G	0.1882	7.22842	intron_variant	EPHB1
Mountain hounds	23	31815750	C	A	0.2	7.22842	intron_variant	EPHB1
Mountain hounds	23	31831416	A	C	0.4676	7.22842	intron_variant	EPHB1
Mountain hounds	23	31850544	A	C	0.4201	7.22842	intron_variant	EPHB1
Mountain hounds	23	31891518	G	A	0.2118	7.22842	intron_variant	EPHB1
Mountain hounds	23	31921259	A	G	0.1676	7.22842	downstream_gene_variant	EPHB1
Mountain hounds	23	31930467	A	C	0.1441	7.22842	intergenic_variant
Mountain hounds	23	31932315	A	C	0.2794	7.22842	intergenic_variant
Mountain hounds	23	31956152	A	G	0.45	7.22842	intergenic_variant
Mountain hounds	23	31957800	A	G	0.4029	7.22842	intergenic_variant
Mountain hounds	23	31964018	A	G	0.2971	7.22842	intergenic_variant
Mountain hounds	23	31982154	G	A	0.4706	7.22842	intergenic_variant
Mountain hounds	23	31988245	A	G	0.2765	7.22842	intergenic_variant
Mountain hounds	23	31994075	G	A	0.3971	7.22842	intergenic_variant
Mountain hounds	23	31999441	A	G	0.3155	7.22842	intergenic_variant
Mountain hounds	23	32620600	C	A	0.3382	7.03123	intron_variant	PPP2R3A
Mountain hounds	23	32674461	A	C	0.4853	7.03123	intergenic_variant
Mountain hounds	23	32726215	A	G	0.4676	7.03123	synonymous_variant	PCCB
Mountain hounds	23	32780599	A	G	0.3794	7.03123	intron_variant	PCCB
Mountain hounds	23	32789219	A	G	0.3853	7.03123	intron_variant	STAG1
Mountain hounds	23	32794875	G	A	0.3765	7.03123	intron_variant	STAG1
Mountain hounds	23	32832091	G	A	0.3824	7.58324	intron_variant	STAG1
Mountain hounds	23	32843824	C	A	0.3794	7.58324	intron_variant	STAG1
Mountain hounds	23	32887126	A	G	0.4676	7.58324	intron_variant	STAG1
Mountain hounds	23	32910396	G	A	0.3765	7.58324	intron_variant	STAG1
Mountain hounds	23	32919891	G	A	0.4794	7.58324	intron_variant	STAG1
Mountain hounds	23	32936547	G	A	0.4794	7.58324	intron_variant	STAG1
Mountain hounds	23	32951943	G	A	0.3794	7.58324	intron_variant	STAG1
Mountain hounds	23	32955324	A	C	0.3794	7.58324	intron_variant	STAG1
Mountain hounds	23	32975359	G	A	0.1882	7.58324	intron_variant	STAG1
Mountain hounds	23	32976203	A	C	0.3794	7.58324	intron_variant	STAG1
Mountain hounds	24	23024914	C	A	0.4294	8.42206	intron_variant	CHMP4B
Mountain hounds	24	23033855	C	A	0.4294	8.42206	intron_variant	CHMP4B
Mountain hounds	24	23043724	G	A	0.4107	8.42206	intron_variant	CHMP4B
Mountain hounds	24	23053741	A	G	0.3971	8.42206	downstream_gene_variant	CHMP4B
Mountain hounds	24	23064103	G	A	0.4353	8.42206	intergenic_variant
Mountain hounds	24	23093030	A	G	0.07353	8.42206	intergenic_variant
Mountain hounds	24	23135307	G	A	0.3882	8.42206	intergenic_variant
Mountain hounds	24	23196435	G	A	0.4048	8.42206	intergenic_variant
Mountain hounds	24	30205827	A	G	0.1176	8.07494	intron_variant	PTPRT
Mountain hounds	24	30231126	A	G	0.2618	8.07494	intron_variant	PTPRT
Mountain hounds	24	30240381	A	G	0.4735	8.07494	intron_variant	PTPRT
Mountain hounds	24	30269777	A	G	0.3765	8.07494	intron_variant	PTPRT
Mountain hounds	24	30298777	G	A	0.4235	8.07494	intron_variant	PTPRT
Mountain hounds	24	30301701	A	G	0.4676	8.07494	intron_variant	PTPRT
Mountain hounds	24	30321568	G	A	0.1941	8.07494	intron_variant	PTPRT
Mountain hounds	24	30368030	A	G	0.4324	8.07494	intron_variant	PTPRT
Mountain hounds	24	30371032	A	G	0.3588	8.07494	intron_variant	PTPRT
Mountain hounds	24	30379690	A	C	0.4676	8.07494	intron_variant	PTPRT
Mountain hounds	25	10405940	A	G	0.1765	7.10091	intron_variant	MTUS2
Mountain hounds	25	10433202	A	G	0.1382	7.10091	intron_variant	MTUS2
Mountain hounds	25	10464700	A	G	0.4206	7.10091	intron_variant	MTUS2
Mountain hounds	25	10500313	A	G	0.07941	7.10091	intron_variant	MTUS2
Mountain hounds	25	10508404	G	A	0.1471	7.10091	intron_variant	MTUS2
Mountain hounds	25	10543458	A	G	0.2853	7.10091	intron_variant	MTUS2
Mountain hounds	25	10564637	C	A	0.2324	7.10091	intron_variant	MTUS2
Mountain hounds	25	10573432	A	G	0.4853	7.10091	intron_variant	MTUS2
Mountain hounds	25	10580785	C	A	0.2382	7.10091	intron_variant	MTUS2
Mountain hounds	25	10584045	C	A	0.4735	7.10091	intron_variant	MTUS2
Mountain hounds	25	10588363	A	G	0.4441	7.10091	intron_variant	MTUS2
Mountain hounds	26	28454077	A	G	0.3559	7.09279	intron_variant	CABIN1
Mountain hounds	26	28467764	A	G	0.1529	7.09279	intron_variant	CABIN1
Mountain hounds	26	28468662	G	A	0.3382	7.09279	intron_variant	CABIN1
Mountain hounds	26	28483569	A	G	0.1941	7.09279	intron_variant	CABIN1
Mountain hounds	26	28492054	G	A	0.3353	7.09279	intron_variant	CABIN1
Mountain hounds	26	28493442	A	G	0.2882	7.09279	intron_variant	CABIN1
Mountain hounds	26	28527018	A	G	0.3206	7.09279	synonymous_variant	ENSCAFG00000014028
Mountain hounds	26	28527150	A	G	0.2235	7.09279	intron_variant	ENSCAFG00000014028
Mountain hounds	26	28544396	G	A	0.2559	7.09279	intron_variant	ENSCAFG00000014034
Mountain hounds	26	28551232	G	A	0.4588	7.09279	upstream_gene_variant	ENSCAFG00000014034
Mountain hounds	26	28565227	G	A	0.2294	7.09279	upstream_gene_variant	GSTT4
Mountain hounds	26	28594350	G	A	0.4441	7.09279	intergenic_variant
Mountain hounds	29	32817851	G	A	0.07353	7.19949	intron_variant	CNGB3
Mountain hounds	29	32835335	G	A	0.1824	7.19949	intron_variant	CNGB3
Mountain hounds	29	32845878	G	A	0.07059	7.19949	intron_variant	CNGB3
Mountain hounds	29	32873197	G	A	0.1647	7.19949	intron_variant	CNGB3
Mountain hounds	29	32879108	A	C	0.4706	7.19949	intron_variant	CNGB3
Mountain hounds	29	32905596	A	C	0.07647	7.19949	intron_variant	CNGB3
Mountain hounds	29	32917944	A	G	0.2559	7.19949	intron_variant	CNGB3
Mountain hounds	29	32932553	A	C	0.1853	7.19949	intron_variant	CNGB3
Mountain hounds	29	32950105	G	A	0.4324	7.19949	intron_variant	CNGB3
Mountain hounds	29	32961118	G	A	0.08735	7.19949	intron_variant	CNGB3
Mountain hounds	29	32970065	G	A	0.2471	7.19949	intron_variant	CNGB3
Mountain hounds	29	32989923	A	G	0.1794	7.19949	intron_variant	CNGB3
Mountain hounds	29	32993605	G	A	0.3294	7.19949	upstream_gene_variant	CNGB3
Mountain hounds	30	28008762	A	G	0.4088	8.1118	intergenic_variant
Mountain hounds	30	28025792	A	G	0.2147	8.1118	upstream_gene_variant	ENSCAFG00000037053
Mountain hounds	30	28031515	A	G	0.09524	8.1118	downstream_gene_variant	ENSCAFG00000037053
Mountain hounds	30	28045260	A	G	0.2412	8.1118	intergenic_variant
Mountain hounds	30	28074620	A	C	0.1441	8.1118	intron_variant	USP3
Mountain hounds	30	28082737	G	A	0.1265	8.1118	intron_variant	USP3
Mountain hounds	30	28088493	A	C	0.1302	8.1118	intron_variant	USP3
Mountain hounds	30	28112114	G	A	0.4471	8.1118	intron_variant	USP3
Mountain hounds	30	28179362	A	C	0.2294	8.1118	intron_variant	USP3
Mountain hounds	30	28180932	A	G	0.3088	8.1118	intron_variant	USP3
Mountain hounds	36	4614079	A	C	0.2	7.57601	non_coding_transcript_exon_variant	ENSCAFG00000039025
Mountain hounds	36	4623473	G	A	0.4676	7.57601	intergenic_variant
Mountain hounds	36	4669519	G	A	0.09118	7.57601	intergenic_variant
Mountain hounds	36	4697941	A	G	0.07941	7.57601	intron_variant	DAPL1
Mountain hounds	36	4707437	A	C	0.1735	7.57601	intergenic_variant
Mountain hounds	36	4714220	A	G	0.1441	7.57601	intergenic_variant
Mountain hounds	36	4741573	G	A	0.3088	7.57601	intron_variant&non_coding_transcript_variant	ENSCAFG00000037413
Mountain hounds	36	4752676	G	A	0.3088	7.57601	upstream_gene_variant	ENSCAFG00000033566
Mountain hounds	36	4760218	A	G	0.1765	7.57601	intergenic_variant
Mountain hounds	36	4779193	G	A	0.2294	7.57601	intergenic_variant
Xi dogs	1	78644062	A	G	0.4235	14.8837	intergenic_variant
Xi dogs	1	78672718	A	G	0.1441	14.8837	intergenic_variant
Xi dogs	1	78683430	G	A	0.2529	14.8837	intergenic_variant
Xi dogs	1	78695610	G	A	0.4382	14.8837	intergenic_variant
Xi dogs	1	78725860	A	G	0.3941	14.8837	intergenic_variant
Xi dogs	1	78734577	A	C	0.2912	14.8837	downstream_gene_variant	ENSCAFG00000038154
Xi dogs	1	78747067	G	A	0.4353	14.8837	intergenic_variant
Xi dogs	1	78756836	A	G	0.1529	14.8837	intergenic_variant
Xi dogs	1	78768383	A	G	0.2588	14.8837	intergenic_variant
Xi dogs	1	78796129	A	G	0.2788	14.8837	intergenic_variant
Xi dogs	1	82602914	A	C	0.1529	17.0132	intergenic_variant
Xi dogs	1	82615928	A	G	0.1559	17.0132	intergenic_variant
Xi dogs	1	82640620	A	G	0.2059	17.0132	intergenic_variant
Xi dogs	1	82647331	C	A	0.4941	17.0132	intergenic_variant
Xi dogs	1	82647962	A	G	0.1824	17.0132	intergenic_variant
Xi dogs	1	82661900	G	A	0.1441	17.0132	intergenic_variant
Xi dogs	1	82721640	G	A	0.3735	17.0132	intron_variant&non_coding_transcript_variant	ENSCAFG00000038859
Xi dogs	1	82742016	A	G	0.3147	17.0132	intron_variant&non_coding_transcript_variant	ENSCAFG00000038859
Xi dogs	1	82747050	A	G	0.05	17.0132	intron_variant&non_coding_transcript_variant	ENSCAFG00000038859
Xi dogs	1	82791360	A	G	0.2794	17.0132	upstream_gene_variant	ENSCAFG00000038859
Xi dogs	1	83438138	A	G	0.1441	20.8724	downstream_gene_variant	TRPM6
Xi dogs	1	83446384	G	A	0.2824	20.8724	intergenic_variant
Xi dogs	1	83449739	A	G	0.3029	20.8724	intergenic_variant
Xi dogs	1	83467667	A	C	0.1353	20.8724	intergenic_variant
Xi dogs	1	83469140	G	A	0.1353	20.8724	intergenic_variant
Xi dogs	1	83482256	G	A	0.1853	20.8724	intron_variant	RORB
Xi dogs	1	83523854	A	C	0.1794	20.8724	intron_variant	RORB
Xi dogs	1	83527426	G	A	0.1265	20.8724	intron_variant	RORB
Xi dogs	1	83539857	A	G	0.3265	20.8724	intergenic_variant
Xi dogs	1	83573505	A	G	0.1559	20.8724	intergenic_variant
Xi dogs	1	83574524	G	A	0.1412	20.8724	intergenic_variant
Xi dogs	1	83593829	C	A	0.3529	20.8724	intergenic_variant
Xi dogs	1	84464570	A	G	0.1765	18.8649	intergenic_variant
Xi dogs	1	84471462	A	G	0.1824	18.8649	intergenic_variant
Xi dogs	1	84487488	A	C	0.2722	18.8649	intergenic_variant
Xi dogs	1	84507690	A	G	0.3353	18.8649	intergenic_variant
Xi dogs	1	84516632	G	A	0.3029	18.8649	intergenic_variant
Xi dogs	1	84531656	A	G	0.3559	18.8649	intergenic_variant
Xi dogs	1	84545999	A	G	0.3765	18.8649	intergenic_variant
Xi dogs	1	84552754	G	A	0.3647	18.8649	intergenic_variant
Xi dogs	1	84573179	G	A	0.3176	18.8649	intergenic_variant
Xi dogs	1	84574309	G	A	0.3824	18.8649	intergenic_variant
Xi dogs	1	84588254	G	A	0.2088	18.8649	intergenic_variant
Xi dogs	1	84598591	G	A	0.4147	18.8649	intergenic_variant
Xi dogs	1	92667839	A	G	0.2588	19.3345	intron_variant	GLIS3
Xi dogs	1	92698043	G	A	0.4941	19.3345	intron_variant	GLIS3
Xi dogs	1	92712680	G	A	0.4676	19.3345	intron_variant	GLIS3
Xi dogs	1	92721325	A	C	0.4971	19.3345	intron_variant	GLIS3
Xi dogs	1	92729782	G	A	0.1029	19.3345	intergenic_variant
Xi dogs	1	92740839	G	A	0.2735	19.3345	intergenic_variant
Xi dogs	1	92770422	A	G	0.3353	19.3345	intergenic_variant
Xi dogs	1	92784862	G	A	0.4324	19.3345	intergenic_variant
Xi dogs	1	92790428	A	G	0.2765	19.3345	intergenic_variant
Xi dogs	1	93219668	A	G	0.4265	15.3467	intergenic_variant
Xi dogs	1	93236098	A	G	0.1206	15.3467	intergenic_variant
Xi dogs	1	93250465	A	G	0.3529	15.3467	intergenic_variant
Xi dogs	1	93262646	G	A	0.3647	15.3467	intergenic_variant
Xi dogs	1	93269238	G	A	0.35	15.3467	intergenic_variant
Xi dogs	1	93338902	G	A	0.07647	15.3467	intron_variant	JAK2
Xi dogs	1	98629571	A	G	0.3853	14.9132	intron_variant	FGD3
Xi dogs	1	98642387	A	G	0.1676	14.9132	intron_variant	FGD3
Xi dogs	1	98682521	G	A	0.4265	14.9132	upstream_gene_variant	ENSCAFG00000002285
Xi dogs	1	98693551	G	A	0.2676	14.9132	upstream_gene_variant	BICD2
Xi dogs	1	98705220	G	A	0.3147	14.9132	intron_variant	BICD2
Xi dogs	1	98722000	A	G	0.1882	14.9132	intron_variant	BICD2
Xi dogs	1	98731945	G	A	0.2853	14.9132	intron_variant	BICD2
Xi dogs	1	98756281	G	A	0.3059	14.9132	upstream_gene_variant	IPPK
Xi dogs	1	98766007	A	G	0.1294	14.9132	intron_variant	IPPK
Xi dogs	1	98785080	A	C	0.2765	14.9132	intron_variant	IPPK
Xi dogs	1	98797429	G	A	0.2883	14.9132	intron_variant	IPPK
Xi dogs	1	98802046	G	A	0.3088	25.7244	downstream_gene_variant	IPPK
Xi dogs	1	98820805	A	G	0.2824	25.7244	intron_variant	CENPP
Xi dogs	1	98839700	G	A	0.3176	25.7244	intron_variant	CENPP
Xi dogs	1	98845111	A	C	0.2118	25.7244	intron_variant	CENPP
Xi dogs	1	98855440	A	G	0.2824	25.7244	intron_variant	CENPP
Xi dogs	1	98875198	G	A	0.2794	25.7244	intron_variant	CENPP
Xi dogs	1	98879709	A	G	0.2794	25.7244	intron_variant	CENPP
Xi dogs	1	98892666	G	A	0.3176	25.7244	intron_variant	CENPP
Xi dogs	1	98902003	A	G	0.3176	25.7244	intron_variant	CENPP
Xi dogs	1	98914629	C	A	0.3176	25.7244	intron_variant	CENPP
Xi dogs	1	98939747	G	A	0.3147	25.7244	intron_variant	CENPP
Xi dogs	1	98952581	A	G	0.3118	25.7244	intron_variant	CENPP
Xi dogs	1	98962840	G	A	0.2824	25.7244	intron_variant	CENPP
Xi dogs	1	99020949	G	A	0.2794	26.2011	upstream_gene_variant	CENPP
Xi dogs	1	99032159	A	G	0.2706	26.2011	intron_variant	NOL8
Xi dogs	1	99052623	G	A	0.3088	26.2011	intron_variant	IARS
Xi dogs	1	99089306	G	A	0.3	26.2011	intron_variant	IARS
Xi dogs	1	99089365	G	A	0.3	26.2011	intron_variant	IARS
Xi dogs	1	99110504	A	G	0.2647	26.2011	intron_variant	IARS
Xi dogs	1	99180536	A	C	0.3029	26.2011	intergenic_variant
Xi dogs	1	100441574	A	G	0.3794	18.6686	upstream_gene_variant	ENSCAFG00000029649
Xi dogs	1	100490308	G	A	0.3794	18.6686	intergenic_variant
Xi dogs	1	100515689	A	G	0.1412	18.6686	intron_variant	ZNF550
Xi dogs	1	100530872	C	A	0.2235	18.6686	intergenic_variant
Xi dogs	1	100571309	A	G	0.3735	18.6686	intron_variant	ENSCAFG00000032253
Xi dogs	2	46924474	C	A	0.2647	18.177	intergenic_variant
Xi dogs	2	46951347	A	G	0.3824	18.177	intergenic_variant
Xi dogs	2	46959987	A	G	0.3735	18.177	intergenic_variant
Xi dogs	2	46978117	A	G	0.1147	18.177	intergenic_variant
Xi dogs	2	46988221	G	A	0.4118	18.177	intergenic_variant
Xi dogs	2	72247240	A	G	0.1118	15.2177	intergenic_variant
Xi dogs	2	72258776	G	A	0.4029	15.2177	downstream_gene_variant	PTAFR
Xi dogs	2	72261799	G	A	0.3059	15.2177	intergenic_variant
Xi dogs	2	72287221	A	C	0.4029	15.2177	intergenic_variant
Xi dogs	2	72315664	G	A	0.09706	15.2177	intron_variant	EYA3
Xi dogs	2	72316164	G	A	0.09706	15.2177	intron_variant	EYA3
Xi dogs	2	72320722	A	G	0.09118	15.2177	upstream_gene_variant	ENSCAFG00000011904
Xi dogs	2	72338725	C	A	0.09118	15.2177	intron_variant	EYA3
Xi dogs	2	72351233	A	G	0.09118	15.2177	intron_variant	EYA3
Xi dogs	2	72383116	A	G	0.4118	15.2177	intron_variant	EYA3
Xi dogs	2	72397648	A	C	0.4088	15.2177	intron_variant	EYA3
Xi dogs	5	60818957	A	G	0.3265	25.9483	intergenic_variant
Xi dogs	5	60823712	A	C	0.3265	25.9483	intergenic_variant
Xi dogs	5	60829812	A	C	0.4647	25.9483	intergenic_variant
Xi dogs	5	60854774	A	G	0.4118	25.9483	intergenic_variant
Xi dogs	5	60856750	G	A	0.4029	25.9483	intergenic_variant
Xi dogs	5	60861334	A	G	0.4294	25.9483	upstream_gene_variant	CAMTA1
Xi dogs	5	60875136	A	G	0.4324	25.9483	intron_variant	CAMTA1
Xi dogs	5	60886344	A	G	0.3353	25.9483	intron_variant	CAMTA1
Xi dogs	5	60911557	C	A	0.1412	25.9483	intron_variant	CAMTA1
Xi dogs	7	39408639	A	G	0.3912	16.0193	intron_variant	DNAH14
Xi dogs	7	39439210	G	A	0.4588	16.0193	intron_variant	DNAH14
Xi dogs	7	39461107	A	G	0.3147	16.0193	intron_variant	DNAH14
Xi dogs	7	39484082	G	A	0.4706	16.0193	intron_variant	DNAH14
Xi dogs	7	39594650	G	A	0.4941	16.0193	intron_variant	DNAH14
Xi dogs	7	45812302	A	G	0.1088	14.9385	intergenic_variant
Xi dogs	7	45820615	A	C	0.2529	14.9385	intergenic_variant
Xi dogs	7	45832084	G	A	0.2441	14.9385	intergenic_variant
Xi dogs	7	45847066	G	A	0.3147	14.9385	intergenic_variant
Xi dogs	7	45862873	A	G	0.2412	14.9385	intergenic_variant
Xi dogs	7	45870051	A	G	0.2412	14.9385	intergenic_variant
Xi dogs	7	45888863	G	A	0.2882	14.9385	intergenic_variant
Xi dogs	7	45909278	A	G	0.1176	14.9385	intron_variant&non_coding_transcript_variant	ENSCAFG00000034206
Xi dogs	7	45943309	A	G	0.1	14.9385	upstream_gene_variant	ENSCAFG00000034206
Xi dogs	7	45981484	A	G	0.3912	14.9385	intron_variant	SETBP1
Xi dogs	9	13741	A	G	0.3118	18.0265	upstream_gene_variant	ENSCAFG00000036427
Xi dogs	9	27308	G	A	0.4971	18.0265	intergenic_variant
Xi dogs	9	43354	A	C	0.3088	18.0265	upstream_gene_variant	CD7
Xi dogs	9	80274	G	A	0.1529	18.0265	upstream_gene_variant	CSNK1D
Xi dogs	9	100148	A	G	0.1588	18.0265	intron_variant	CSNK1D
Xi dogs	9	106961	A	G	0.1529	18.0265	downstream_gene_variant	SLC16A3
Xi dogs	9	141715	A	G	0.1529	18.0265	intron_variant	RFNG
Xi dogs	9	154654	A	G	0.1529	18.0265	intron_variant	RFNG
Xi dogs	9	167883	A	G	0.1529	18.0265	intron_variant	RFNG
Xi dogs	9	210364	G	A	0.4324	17.4314	intron_variant	RFNG
Xi dogs	9	275681	A	G	0.4118	17.4314	intergenic_variant
Xi dogs	9	281094	A	G	0.1529	17.4314	upstream_gene_variant	DCXR
Xi dogs	9	299357	A	G	0.1529	17.4314	intron_variant	LRRC45
Xi dogs	9	378718	A	G	0.4941	17.4314	intron_variant	TSPAN10
Xi dogs	9	11037347	G	A	0.45	18.9514	intergenic_variant
Xi dogs	9	11044417	A	G	0.1206	18.9514	intergenic_variant
Xi dogs	9	11085077	G	A	0.1206	18.9514	intergenic_variant
Xi dogs	9	11096296	A	G	0.4176	18.9514	intergenic_variant
Xi dogs	9	11152469	A	G	0.2899	18.9514	intron_variant	TANC2
Xi dogs	9	11165753	A	G	0.2676	18.9514	intron_variant	TANC2
Xi dogs	9	11174121	G	A	0.2529	18.9514	intron_variant	TANC2
Xi dogs	9	11181685	G	A	0.4265	18.9514	intron_variant	TANC2
Xi dogs	9	11198156	A	G	0.2176	18.9514	intron_variant	TANC2
Xi dogs	9	20608498	A	G	0.25	23.6349	intron_variant	STAT3
Xi dogs	9	20628009	A	C	0.1235	23.6349	intron_variant	STAT5A
Xi dogs	9	20640004	G	A	0.4118	23.6349	upstream_gene_variant	STAT5A
Xi dogs	9	20654904	G	A	0.2794	23.6349	intron_variant	STAT5B
Xi dogs	9	20671507	A	G	0.3941	23.6349	intron_variant	STAT5B
Xi dogs	9	20676785	A	C	0.2794	23.6349	intron_variant	STAT5B
Xi dogs	9	20686832	G	A	0.2765	23.6349	intron_variant	STAT5B
Xi dogs	9	20767011	G	A	0.2118	23.6349	intron_variant	RAB5C
Xi dogs	9	20767576	A	G	0.1765	23.6349	intron_variant	RAB5C
Xi dogs	9	20790994	G	A	0.1559	23.6349	downstream_gene_variant	KAT2A
Xi dogs	9	21232392	A	G	0.2559	20.3052	intergenic_variant
Xi dogs	9	21235839	A	C	0.2735	20.3052	upstream_gene_variant	KRT19
Xi dogs	9	21245790	A	G	0.2559	20.3052	upstream_gene_variant	KRT15
Xi dogs	9	21260899	A	G	0.4559	20.3052	upstream_gene_variant	KRT13
Xi dogs	9	21268748	A	G	0.3147	20.3052	downstream_gene_variant	KRT13
Xi dogs	9	21297526	G	A	0.4559	20.3052	upstream_gene_variant	KRT32
Xi dogs	9	21304647	G	A	0.07941	20.3052	intron_variant	KRT32
Xi dogs	9	21314535	A	G	0.4176	20.3052	intron_variant	KRT32
Xi dogs	9	21325283	A	G	0.2912	20.3052	downstream_gene_variant	ENSCAFG00000015956
Xi dogs	10	12814197	A	G	0.3941	16.1439	intron_variant	TSPAN8
Xi dogs	10	12857069	C	A	0.2912	16.1439	upstream_gene_variant	RF00026
Xi dogs	10	12861988	A	G	0.2559	16.1439	downstream_gene_variant	RF00026
Xi dogs	10	12882799	A	G	0.2176	16.1439	intron_variant&non_coding_transcript_variant	ENSCAFG00000037480
Xi dogs	10	12896818	A	G	0.06471	16.1439	upstream_gene_variant	ENSCAFG00000037480
Xi dogs	10	12909551	A	G	0.2471	16.1439	intergenic_variant
Xi dogs	10	12949240	A	G	0.3412	16.1439	intergenic_variant
Xi dogs	10	14617187	A	C	0.3029	18.8217	intergenic_variant
Xi dogs	10	14619780	G	A	0.2941	18.8217	intergenic_variant
Xi dogs	10	14642452	G	A	0.2118	18.8217	intergenic_variant
Xi dogs	10	14663125	A	G	0.1882	18.8217	intergenic_variant
Xi dogs	10	14663229	G	A	0.2294	18.8217	intergenic_variant
Xi dogs	10	14671068	A	G	0.1794	18.8217	intergenic_variant
Xi dogs	10	14685262	G	A	0.1382	18.8217	intergenic_variant
Xi dogs	10	14689687	A	G	0.1765	18.8217	intergenic_variant
Xi dogs	10	14705018	A	G	0.2294	18.8217	intergenic_variant
Xi dogs	10	14715125	C	A	0.2382	18.8217	intergenic_variant
Xi dogs	10	23622049	G	A	0.3176	15.6432	upstream_gene_variant	RF00096
Xi dogs	10	23662176	A	C	0.4059	15.6432	upstream_gene_variant	XRCC6
Xi dogs	10	23696705	A	G	0.06765	15.6432	upstream_gene_variant	PMM1
Xi dogs	10	23700469	G	A	0.4	15.6432	intron_variant	PMM1
Xi dogs	10	23724555	A	G	0.4529	15.6432	upstream_gene_variant	POLR3H
Xi dogs	10	23761705	G	A	0.2471	15.6432	intron_variant	ACO2
Xi dogs	11	8407491	A	G	0.3824	14.6079	intron_variant	ENSCAFG00000000175
Xi dogs	11	8439788	A	C	0.3088	14.6079	intron_variant	DMXL1
Xi dogs	11	8448921	G	A	0.4088	14.6079	intron_variant	DMXL1
Xi dogs	11	8569300	A	G	0.3735	14.6079	intergenic_variant
Xi dogs	11	8578208	G	A	0.2265	14.6079	intergenic_variant
Xi dogs	11	25856947	A	C	0.3853	14.9811	intergenic_variant
Xi dogs	11	25862528	G	A	0.4294	14.9811	intergenic_variant
Xi dogs	11	25876243	G	A	0.3265	14.9811	intergenic_variant
Xi dogs	11	25885013	G	A	0.3618	14.9811	intron_variant	GFRA3
Xi dogs	11	25898514	A	G	0.3059	14.9811	upstream_gene_variant	GFRA3
Xi dogs	11	25910575	G	A	0.2824	14.9811	intron_variant	CDC25C
Xi dogs	11	25928334	A	G	0.1559	14.9811	intron_variant	CDC25C
Xi dogs	11	25944420	G	A	0.3353	14.9811	intron_variant	FAM53C
Xi dogs	11	25966803	C	A	0.4467	14.9811	intron_variant	KDM3B
Xi dogs	11	25976077	A	C	0.1147	14.9811	missense_variant	KDM3B
Xi dogs	11	37007443	G	A	0.45	15.9656	intron_variant&non_coding_transcript_variant	ENSCAFG00000040798
Xi dogs	11	37020460	A	G	0.4353	15.9656	downstream_gene_variant	ENSCAFG00000040798
Xi dogs	11	37037016	A	G	0.3971	15.9656	downstream_gene_variant	ENSCAFG00000032537
Xi dogs	11	37047990	A	G	0.4676	15.9656	intergenic_variant
Xi dogs	11	37099055	A	G	0.08824	15.9656	intergenic_variant
Xi dogs	11	37181401	G	A	0.3588	15.9656	upstream_gene_variant	CNTLN
Xi dogs	12	29230518	G	A	0.2118	14.4487	intergenic_variant
Xi dogs	12	29236595	A	G	0.3588	14.4487	intergenic_variant
Xi dogs	12	29272809	A	G	0.4176	14.4487	downstream_gene_variant	RF00091
Xi dogs	12	29292161	G	A	0.4118	14.4487	intergenic_variant
Xi dogs	12	29303743	A	C	0.4559	14.4487	intergenic_variant
Xi dogs	12	29377467	C	A	0.4324	14.4487	intergenic_variant
Xi dogs	12	58623301	G	A	0.4441	17.8608	intron_variant	ASCC3
Xi dogs	12	58627319	A	C	0.4588	17.8608	intron_variant	ASCC3
Xi dogs	12	58640462	G	A	0.1971	17.8608	intron_variant	ASCC3
Xi dogs	12	58650021	A	G	0.1853	17.8608	intron_variant	ASCC3
Xi dogs	12	58668124	G	A	0.2029	17.8608	intron_variant	ASCC3
Xi dogs	12	58678218	C	A	0.3088	17.8608	intron_variant	ASCC3
Xi dogs	12	58684891	G	A	0.4588	17.8608	intron_variant	ASCC3
Xi dogs	12	58699739	C	A	0.4382	17.8608	intron_variant	ASCC3
Xi dogs	12	58767080	G	A	0.3676	17.8608	intron_variant	ASCC3
Xi dogs	14	27012522	G	A	0.4794	14.8793	intergenic_variant
Xi dogs	14	27032585	A	C	0.4324	14.8793	intergenic_variant
Xi dogs	14	27037935	A	G	0.3529	14.8793	intergenic_variant
Xi dogs	14	27053216	G	A	0.3402	14.8793	intergenic_variant
Xi dogs	14	27063078	G	A	0.4353	14.8793	intergenic_variant
Xi dogs	14	27100600	G	A	0.4676	14.8793	downstream_gene_variant	ENSCAFG00000040361
Xi dogs	14	27112360	G	A	0.3794	14.8793	intron_variant&non_coding_transcript_variant	ENSCAFG00000040361
Xi dogs	14	27137138	G	A	0.3618	14.8793	upstream_gene_variant	ENSCAFG00000002306
Xi dogs	14	27187448	G	A	0.1647	14.8793	intergenic_variant
Xi dogs	14	27197205	A	G	0.4265	14.8793	intergenic_variant
Xi dogs	15	30203241	C	A	0.1882	16.1426	intron_variant&non_coding_transcript_variant	ENSCAFG00000039295
Xi dogs	15	30216103	A	C	0.2647	16.1426	intron_variant&non_coding_transcript_variant	ENSCAFG00000038968
Xi dogs	15	30256582	G	A	0.3049	16.1426	intron_variant&non_coding_transcript_variant	ENSCAFG00000038968
Xi dogs	15	30316931	A	G	0.4324	16.1426	intergenic_variant
Xi dogs	15	30329406	A	C	0.2206	16.1426	upstream_gene_variant	DUSP6
Xi dogs	15	30339168	A	G	0.2618	16.1426	intergenic_variant
Xi dogs	15	30348521	A	G	0.3559	16.1426	intergenic_variant
Xi dogs	15	30364874	A	C	0.1088	16.1426	intergenic_variant
Xi dogs	15	30374321	G	A	0.4941	16.1426	intergenic_variant
Xi dogs	15	30391797	A	G	0.3294	16.1426	intron_variant	POC1B
Xi dogs	15	30397224	G	A	0.3529	16.1426	intron_variant	POC1B
Xi dogs	15	42031394	A	G	0.2029	15.3691	intron_variant&non_coding_transcript_variant	ENSCAFG00000037558
Xi dogs	15	42043017	G	A	0.4529	15.3691	intron_variant&non_coding_transcript_variant	ENSCAFG00000037558
Xi dogs	15	42050523	A	G	0.1647	15.3691	upstream_gene_variant	RF00494
Xi dogs	15	42060575	A	G	0.2794	15.3691	intron_variant&non_coding_transcript_variant	ENSCAFG00000037558
Xi dogs	15	42070047	G	A	0.3353	15.3691	intron_variant&non_coding_transcript_variant	ENSCAFG00000037558
Xi dogs	15	42094667	G	A	0.2633	15.3691	intron_variant&non_coding_transcript_variant	ENSCAFG00000037558
Xi dogs	15	42106768	A	G	0.3029	15.3691	intron_variant&non_coding_transcript_variant	ENSCAFG00000037558
Xi dogs	15	42121707	G	A	0.4324	15.3691	intron_variant&non_coding_transcript_variant	ENSCAFG00000037558
Xi dogs	15	42132119	G	A	0.1647	15.3691	intergenic_variant
Xi dogs	15	42152040	A	G	0.1235	15.3691	intergenic_variant
Xi dogs	15	42180744	A	G	0.3588	15.3691	intergenic_variant
Xi dogs	15	42183584	A	C	0.2088	15.3691	upstream_gene_variant	STAB2
Xi dogs	18	13211997	A	G	0.2353	16.4886	intron_variant	COG5
Xi dogs	18	13231586	A	G	0.2353	16.4886	intron_variant	COG5
Xi dogs	18	13260963	A	G	0.1794	16.4886	intron_variant	COG5
Xi dogs	18	13264370	G	A	0.1794	16.4886	intron_variant	COG5
Xi dogs	18	13275856	G	A	0.1412	16.4886	intron_variant	COG5
Xi dogs	18	13302910	A	G	0.1912	16.4886	intron_variant	COG5
Xi dogs	18	13312997	G	A	0.1324	16.4886	intron_variant	COG5
Xi dogs	18	13325298	A	G	0.09118	16.4886	intron_variant	COG5
Xi dogs	18	13336283	A	G	0.3353	16.4886	intron_variant	COG5
Xi dogs	18	13346057	G	A	0.1794	16.4886	intron_variant	HBP1
Xi dogs	18	13360801	C	A	0.1441	16.4886	intron_variant	HBP1
Xi dogs	18	13384885	G	A	0.1971	16.4886	intron_variant	PRKAR2B
Xi dogs	21	4229603	A	C	0.2959	20.0229	intergenic_variant
Xi dogs	21	4252999	G	A	0.07059	20.0229	intergenic_variant
Xi dogs	21	4281227	G	A	0.4765	20.0229	intergenic_variant
Xi dogs	21	4333506	A	G	0.4763	20.0229	intergenic_variant
Xi dogs	21	4343661	C	A	0.429	20.0229	intergenic_variant
Xi dogs	21	4369686	A	G	0.429	20.0229	intergenic_variant
Xi dogs	21	4377980	G	A	0.429	20.0229	intergenic_variant
Xi dogs	21	4388338	G	A	0.3706	20.0229	intergenic_variant
Xi dogs	23	38242824	A	G	0.1706	15.8416	upstream_gene_variant	PLS1
Xi dogs	23	38278788	A	G	0.3412	15.8416	intron_variant	PLS1
Xi dogs	23	38296022	A	C	0.1471	15.8416	intron_variant	PLS1
Xi dogs	23	38346847	A	C	0.4912	15.8416	downstream_gene_variant	PLS1
Xi dogs	23	38381074	G	A	0.09118	15.8416	intron_variant	TRPC1
Xi dogs	24	8220474	G	A	0.4088	16.4785	intergenic_variant
Xi dogs	24	8228834	A	G	0.06765	16.4785	intergenic_variant
Xi dogs	24	8252207	G	A	0.4647	16.4785	intergenic_variant
Xi dogs	24	8265516	G	A	0.3412	16.4785	intergenic_variant
Xi dogs	24	8305936	A	G	0.3029	16.4785	intergenic_variant
Xi dogs	24	8310673	A	G	0.3088	16.4785	intergenic_variant
Xi dogs	24	8319590	A	G	0.3676	16.4785	intergenic_variant
Xi dogs	24	8335029	A	G	0.3676	16.4785	intergenic_variant
Xi dogs	24	8351762	G	A	0.4059	16.4785	intergenic_variant
Xi dogs	24	8392128	G	A	0.4294	16.4785	downstream_gene_variant	ENSCAFG00000032853
Xi dogs	24	31833667	A	G	0.1324	14.8064	missense_variant	R3HDML
Xi dogs	24	31840730	G	A	0.05	14.8064	3_prime_UTR_variant	R3HDML
Xi dogs	24	31851819	A	G	0.09118	14.8064	intron_variant&non_coding_transcript_variant	ENSCAFG00000036577
Xi dogs	24	31871459	C	A	0.4235	14.8064	intron_variant&non_coding_transcript_variant	ENSCAFG00000036577
Xi dogs	24	31876371	A	G	0.4794	14.8064	intron_variant&non_coding_transcript_variant	ENSCAFG00000036577
Xi dogs	24	31886048	A	G	0.1147	14.8064	intron_variant	HNF4A
Xi dogs	24	31890045	A	G	0.4706	14.8064	intron_variant	HNF4A
Xi dogs	24	31901064	G	A	0.4588	14.8064	missense_variant	HNF4A
Xi dogs	24	31909005	A	G	0.4941	14.8064	downstream_gene_variant	HNF4A
Xi dogs	24	31921463	A	G	0.1824	14.8064	intergenic_variant
Xi dogs	24	31939435	A	G	0.4647	14.8064	upstream_gene_variant	TTPAL
Xi dogs	24	31942032	A	G	0.2071	14.8064	upstream_gene_variant	TTPAL
Xi dogs	24	31977012	A	G	0.213	14.8064	intron_variant	SERINC3
Xi dogs	24	33244308	A	G	0.2	18.0468	intron_variant	ZNF335
Xi dogs	24	33253438	G	A	0.4118	18.0468	intergenic_variant
Xi dogs	24	33266412	A	G	0.1176	18.0468	intergenic_variant
Xi dogs	24	33282443	A	G	0.4176	18.0468	downstream_gene_variant	MMP9
Xi dogs	24	33288520	A	G	0.4588	18.0468	upstream_gene_variant	SLC12A5
Xi dogs	24	33299738	A	G	0.1765	18.0468	intron_variant	SLC12A5
Xi dogs	24	33323220	C	A	0.2	18.0468	downstream_gene_variant	SLC12A5
Xi dogs	24	33336753	G	A	0.3206	18.0468	intron_variant	NCOA5
Xi dogs	24	33369122	G	A	0.4647	18.0468	upstream_gene_variant	CD40
Xi dogs	24	33377921	A	G	0.4676	18.0468	intron_variant	CD40
Xi dogs	24	33384645	A	G	0.3529	18.0468	downstream_gene_variant	CD40
Xi dogs	24	33391958	G	A	0.09706	18.0468	intergenic_variant
Xi dogs	24	33399743	G	A	0.3618	18.0468	intergenic_variant
Xi dogs	24	34612897	A	C	0.07353	15.0229	intergenic_variant
Xi dogs	24	34636854	A	G	0.07353	15.0229	intergenic_variant
Xi dogs	24	34650260	A	G	0.4618	15.0229	intergenic_variant
Xi dogs	24	34658488	A	G	0.4618	15.0229	intron_variant	NCOA3
Xi dogs	24	34667570	A	C	0.07353	15.0229	intron_variant	NCOA3
Xi dogs	24	34687550	G	A	0.07353	15.0229	intron_variant	NCOA3
Xi dogs	24	34696349	G	A	0.4588	15.0229	intron_variant	NCOA3
Xi dogs	24	34699848	G	A	0.07353	15.0229	stop_retained_variant	NCOA3
Xi dogs	24	34720919	A	C	0.07353	15.0229	intron_variant	NCOA3
Xi dogs	24	34737337	A	G	0.3971	15.0229	intron_variant	SULF2
Xi dogs	24	34752654	A	G	0.1088	15.0229	synonymous_variant	SULF2
Xi dogs	24	34770328	A	G	0.3765	15.0229	intron_variant	SULF2
Xi dogs	24	34775608	A	G	0.1941	15.0229	intron_variant	SULF2
Xi dogs	24	34790784	A	G	0.2353	15.0229	intron_variant	SULF2
Xi dogs	24	34792759	A	G	0.06765	15.0229	intron_variant	SULF2
Xi dogs	25	4404524	G	A	0.1706	17.0082	intergenic_variant
Xi dogs	25	4430801	G	A	0.4412	17.0082	intergenic_variant
Xi dogs	25	4443102	G	A	0.2412	17.0082	intron_variant	DCLK1
Xi dogs	25	4446840	G	A	0.2471	17.0082	intron_variant	DCLK1
Xi dogs	25	4457751	A	G	0.4441	17.0082	intron_variant	DCLK1
Xi dogs	25	4482831	A	G	0.2912	17.0082	intron_variant	DCLK1
Xi dogs	25	4498360	G	A	0.4941	17.0082	intron_variant	DCLK1
Xi dogs	25	4511113	A	G	0.2176	17.0082	intron_variant	DCLK1
Xi dogs	25	4523030	A	C	0.4853	17.0082	intron_variant	DCLK1
Xi dogs	25	4545567	G	A	0.4941	17.0082	intron_variant	DCLK1
Xi dogs	25	4562697	A	G	0.2941	17.0082	intron_variant	DCLK1
Xi dogs	25	4576087	G	A	0.4941	17.0082	intron_variant	DCLK1
Xi dogs	25	4600230	A	C	0.4912	16.7636	intron_variant	DCLK1
Xi dogs	25	4614777	G	A	0.4118	16.7636	intron_variant	DCLK1
Xi dogs	25	4630619	A	G	0.4382	16.7636	intron_variant	DCLK1
Xi dogs	25	4644607	A	C	0.3971	16.7636	intron_variant	DCLK1
Xi dogs	25	4671984	A	G	0.2176	16.7636	intron_variant	DCLK1
Xi dogs	25	4693658	G	A	0.4441	16.7636	intron_variant	DCLK1
Xi dogs	25	4697701	A	G	0.4353	16.7636	intron_variant	DCLK1
Xi dogs	25	4711011	A	G	0.4265	16.7636	downstream_gene_variant	DCLK1
Xi dogs	25	4723140	A	C	0.1265	16.7636	intron_variant	DCLK1
Xi dogs	25	4749749	A	G	0.2765	16.7636	intron_variant	DCLK1
Xi dogs	25	4763065	A	G	0.1206	16.7636	intron_variant	DCLK1
Xi dogs	25	4792562	G	A	0.4029	16.7636	intergenic_variant
Xi dogs	25	9011657	A	G	0.3735	17.8128	intergenic_variant
Xi dogs	25	9062038	A	G	0.2265	17.8128	intergenic_variant
Xi dogs	25	9068913	A	G	0.2294	17.8128	intergenic_variant
Xi dogs	25	9071351	A	G	0.4941	17.8128	intergenic_variant
Xi dogs	25	9078743	G	A	0.2824	17.8128	downstream_gene_variant	ENSCAFG00000033077
Xi dogs	25	9104183	A	G	0.2059	17.8128	intron_variant&non_coding_transcript_variant	ENSCAFG00000033077
Xi dogs	25	9114711	A	G	0.4588	17.8128	upstream_gene_variant	ENSCAFG00000033077
Xi dogs	25	9140236	G	A	0.2471	17.8128	downstream_gene_variant	TEX26
Xi dogs	25	9151363	G	A	0.2941	17.8128	intron_variant	TEX26
Xi dogs	25	9166012	A	G	0.2059	17.8128	intron_variant	TEX26
Xi dogs	25	9178510	A	C	0.1324	17.8128	upstream_gene_variant	TEX26
Xi dogs	25	9188581	G	A	0.3265	17.8128	intron_variant	MEDAG
Xi dogs	25	9198937	G	A	0.3912	17.8128	intron_variant	MEDAG
Xi dogs	25	17235812	C	A	0.2941	15.1115	intron_variant	XPO4
Xi dogs	25	17280279	A	G	0.3765	15.1115	intron_variant	XPO4
Xi dogs	25	17313329	A	C	0.3765	15.1115	intron_variant	XPO4
Xi dogs	25	17358050	A	G	0.1059	15.1115	intron_variant	EEF1AKMT1
Xi dogs	25	17374565	A	C	0.1118	15.1115	intron_variant	EEF1AKMT1
Xi dogs	25	17381531	A	G	0.2441	15.1115	intron_variant	EEF1AKMT1
Xi dogs	26	8818	C	A	0.4735	14.9194	intergenic_variant
Xi dogs	26	14821	A	G	0.2324	14.9194	intron_variant	ANHX
Xi dogs	26	26999	G	A	0.2382	14.9194	upstream_gene_variant	ANHX
Xi dogs	26	42576	G	A	0.4912	14.9194	downstream_gene_variant	ZNF268
Xi dogs	26	86821	A	G	0.4941	14.9194	upstream_gene_variant	ZNF268
Xi dogs	26	97489	A	C	0.4201	14.9194	intron_variant	ZNF10
Xi dogs	26	131499	A	G	0.05882	14.9194	downstream_gene_variant	ZNF140
Xi dogs	26	139279	A	G	0.4618	14.9194	downstream_gene_variant	ENSCAFG00000024332
Xi dogs	26	156325	G	A	0.2794	14.9194	intergenic_variant
Xi dogs	26	164817	A	G	0.1059	14.9194	intergenic_variant
Xi dogs	26	167308	A	G	0.1059	14.9194	intergenic_variant
Xi dogs	26	173557	G	A	0.1912	14.9194	downstream_gene_variant	ZNF84
Xi dogs	26	183612	G	A	0.2176	14.9194	intron_variant	ZNF84
Xi dogs	26	195205	C	A	0.2176	14.9194	intron_variant	ZNF84
Xi dogs	26	863466	A	G	0.2029	16.9724	intron_variant	EP400
Xi dogs	26	875116	G	A	0.2912	16.9724	intron_variant	EP400
Xi dogs	26	899272	A	G	0.2588	16.9724	intron_variant	EP400
Xi dogs	26	903677	A	G	0.2147	16.9724	intron_variant	EP400
Xi dogs	26	913186	A	G	0.1206	16.9724	intron_variant	EP400
Xi dogs	26	915242	G	A	0.4353	16.9724	intron_variant	EP400
Xi dogs	26	927819	A	G	0.2147	16.9724	intron_variant	EP400
Xi dogs	26	941170	G	A	0.25	16.9724	upstream_gene_variant	EP400
Xi dogs	26	956412	G	A	0.2382	16.9724	intron_variant	PUS1
Xi dogs	28	1424079	A	G	0.3176	15.8733	intron_variant	ERCC6
Xi dogs	28	1489149	G	A	0.07941	15.8733	intron_variant	CHAT
Xi dogs	28	1515250	A	G	0.3706	15.8733	intron_variant	CHAT
Xi dogs	28	1529920	A	G	0.08235	15.8733	downstream_gene_variant	CHAT
Xi dogs	28	1535224	G	A	0.1824	15.8733	upstream_gene_variant	C28H10orf53
Xi dogs	28	1550440	A	G	0.2559	15.8733	missense_variant	C28H10orf53
Xi dogs	28	1563506	A	G	0.4971	15.8733	downstream_gene_variant	OGDHL
Xi dogs	28	1563626	G	A	0.3706	15.8733	downstream_gene_variant	OGDHL
Xi dogs	28	1577966	G	A	0.4588	15.8733	intron_variant	OGDHL
Xi dogs	28	1581018	A	G	0.4471	15.8733	intron_variant	OGDHL
Xi dogs	28	1594255	G	A	0.1735	15.8733	intron_variant	OGDHL
Xi dogs	28	8201933	A	G	0.1647	24.6461	intergenic_variant
Xi dogs	28	8210550	C	A	0.2012	24.6461	missense_variant	PLCE1
Xi dogs	28	8216688	G	A	0.05	24.6461	intron_variant	PLCE1
Xi dogs	28	8230318	G	A	0.2235	24.6461	intron_variant	PLCE1
Xi dogs	28	8257776	A	G	0.1382	24.6461	intron_variant	PLCE1
Xi dogs	28	8263698	A	G	0.1206	24.6461	intron_variant	PLCE1
Xi dogs	28	8276534	C	A	0.15	24.6461	intron_variant	PLCE1
Xi dogs	28	8286362	G	A	0.1882	24.6461	intron_variant	PLCE1
Xi dogs	28	8290783	A	G	0.1588	24.6461	intron_variant	PLCE1
Xi dogs	28	8300139	A	G	0.05294	24.6461	intron_variant	PLCE1
Xi dogs	28	8306310	G	A	0.05	24.6461	intron_variant	PLCE1
Xi dogs	28	8322855	G	A	0.05	24.6461	intron_variant	PLCE1
Xi dogs	28	8334581	A	G	0.08235	24.6461	intron_variant	PLCE1
Xi dogs	28	8351414	G	A	0.09412	24.6461	intron_variant	PLCE1
Xi dogs	28	8352424	G	A	0.2441	24.6461	intron_variant	PLCE1
Xi dogs	28	8399592	G	A	0.2765	24.6461	synonymous_variant	PLCE1
Xi dogs	29	1804545	G	A	0.2265	17.5203	intergenic_variant
Xi dogs	29	1805474	C	A	0.4912	17.5203	intergenic_variant
Xi dogs	29	1820774	A	G	0.1676	17.5203	intergenic_variant
Xi dogs	29	1838841	G	A	0.1059	17.5203	intergenic_variant
Xi dogs	29	1852958	A	G	0.2029	17.5203	intergenic_variant
Xi dogs	29	1869204	C	A	0.4382	17.5203	intergenic_variant
Xi dogs	29	1876437	G	A	0.4735	17.5203	intergenic_variant
Xi dogs	29	1894106	A	G	0.1529	17.5203	intergenic_variant
Xi dogs	29	1899855	G	A	0.15	17.5203	intergenic_variant
Xi dogs	29	1909406	G	A	0.1559	17.5203	intergenic_variant
Xi dogs	29	1924236	G	A	0.3412	17.5203	intergenic_variant
Xi dogs	29	1933166	G	A	0.1353	17.5203	intergenic_variant
Xi dogs	29	1943815	A	G	0.1529	17.5203	intergenic_variant
Xi dogs	29	1962497	A	G	0.3588	17.5203	intergenic_variant
Xi dogs	29	1971726	G	A	0.4853	17.5203	intergenic_variant
Xi dogs	29	1988062	A	G	0.1765	17.5203	intergenic_variant
Xi dogs	29	6813234	A	G	0.2353	21.2898	intron_variant	XKR4
Xi dogs	29	6817886	A	G	0.3794	21.2898	intron_variant	XKR4
Xi dogs	29	6833441	A	G	0.4588	21.2898	intron_variant	XKR4
Xi dogs	29	6852489	C	A	0.4088	21.2898	intron_variant	XKR4
Xi dogs	29	6908160	G	A	0.4824	21.2898	intron_variant	XKR4
Xi dogs	29	6911982	A	G	0.5	21.2898	intron_variant	XKR4
Xi dogs	29	6991301	G	A	0.4	21.2898	intron_variant	XKR4
Xi dogs	29	10419942	G	A	0.4647	18.7028	intergenic_variant
Xi dogs	29	10470013	A	G	0.3794	18.7028	upstream_gene_variant	ENSCAFG00000036688
Xi dogs	29	10476562	A	C	0.2441	18.7028	intron_variant&non_coding_transcript_variant	ENSCAFG00000036688
Xi dogs	29	10527481	A	G	0.4029	18.7028	intron_variant&non_coding_transcript_variant	ENSCAFG00000036688
Xi dogs	29	10537089	A	G	0.1272	18.7028	downstream_gene_variant	ENSCAFG00000036688
Xi dogs	29	10544857	G	A	0.1647	18.7028	intergenic_variant
Xi dogs	29	10568487	G	A	0.2794	18.7028	intergenic_variant
Xi dogs	29	10587617	A	G	0.2059	18.7028	intergenic_variant
Xi dogs	29	10597702	G	A	0.3647	18.7028	intergenic_variant
Xi dogs	30	22200597	G	A	0.05882	22.4207	intron_variant	TCF12
Xi dogs	30	22232838	G	A	0.3088	22.4207	intron_variant	TCF12
Xi dogs	30	22281962	A	G	0.05882	22.4207	intron_variant	TCF12
Xi dogs	30	22286794	G	A	0.3529	22.4207	intron_variant	TCF12
Xi dogs	30	22303229	G	A	0.4559	22.4207	intron_variant	TCF12
Xi dogs	30	22308997	G	A	0.3088	22.4207	intron_variant	TCF12
Xi dogs	30	22321259	A	G	0.3529	22.4207	intron_variant	TCF12
Xi dogs	30	22338244	G	A	0.3088	22.4207	intron_variant	TCF12
Xi dogs	30	22344543	A	G	0.3529	22.4207	intron_variant	TCF12
Xi dogs	30	22357711	A	G	0.3088	22.4207	intron_variant	TCF12
Xi dogs	30	22388925	G	A	0.3529	22.4207	intron_variant	TCF12
Xi dogs	31	19838511	A	G	0.45	14.4841	intergenic_variant
Xi dogs	31	19842735	A	G	0.4324	14.4841	intergenic_variant
Xi dogs	31	19851500	A	G	0.3706	14.4841	intergenic_variant
Xi dogs	31	19890244	A	G	0.3941	14.4841	intergenic_variant
Xi dogs	31	19901083	G	A	0.2765	14.4841	intergenic_variant
Xi dogs	31	19910407	G	A	0.3735	14.4841	intergenic_variant
Xi dogs	31	19921838	G	A	0.1647	14.4841	intergenic_variant
Xi dogs	31	19931865	G	A	0.3294	14.4841	intergenic_variant
Xi dogs	31	19967579	A	G	0.3661	14.4841	intergenic_variant
Xi dogs	31	19980967	A	G	0.08824	14.4841	intergenic_variant
Xi dogs	31	19992028	G	A	0.3882	14.4841	intergenic_variant
